# Supplementary material for: Genome-wide Association Mapping Identifies a New Arsenate Reductase Enzyme Critical for Limiting Arsenic Accumulation in Plants
Source: PLoS Biol. 2014 Dec 2;12(12):e1002009. doi: 10.1371/journal.pbio.1002009 (PMC4251824; doi:10.1371/journal.pbio.1002009)
Supplement: Data S2 — Raw data used to prepare Figure 2 . (XLSX) [file pbio.1002009.s012.xlsx]

## Sheet: Figure 2A & B
Raw data for Figure 2A and B
chromosome	position (Mb, TAIR 8)	score		chromosome	position (Mb, TAIR 8)	score		chromosome	position (Mb, TAIR 8)	score		chromosome	position (Mb, TAIR 8)	score		chromosome	position (Mb, TAIR 8)	score
1	0.000657	0.98621		2	0.002651	0.257631		3	0.001394	0.61381		4	0.00147	0.702093		5	0.001168	0.274011
1	0.003102	0.966838		2	0.002961	1.11501		3	0.004681	0.196301		4	0.001513	0.178748		5	0.001906	0.46564
1	0.004648	0.789949		2	0.010035	0.512831		3	0.005444	0.065976		4	0.001575	0.644306		5	0.002663	0.276172
1	0.00488	0.113978		2	0.029477	0.131217		3	0.005826	0.300895		4	0.001699	1.60953		5	0.003392	0.148635
1	0.005975	0.259633		2	0.030398	0.136415		3	0.009268	0.157504		4	0.001928	0.893859		5	0.00566	0.194002
1	0.006063	0.205537		2	0.030947	0.738518		3	0.009374	0.148747		4	0.002062	1.2637		5	0.005799	0.0468234
1	0.006449	0.377657		2	0.031064	0.112626		3	0.010352	0.750907		4	0.002876	0.170229		5	0.005918	0.550645
1	0.006514	0.523809		2	0.031142	0.991458		3	0.014199	0.513263		4	0.00298	0.70368		5	0.006323	0.0657228
1	0.006603	0.308509		2	0.031187	0.290171		3	0.014851	0.243681		4	0.003003	0.639797		5	0.006454	0.333904
1	0.006768	0.140657		2	0.03651	0.631688		3	0.016517	0.153251		4	0.003645	0.388005		5	0.006919	1.05835
1	0.007601	0.245429		2	0.036822	0.255282		3	0.016871	0.579967		4	0.003749	0.623221		5	0.008682	0.00835544
1	0.008193	1.08325		2	0.037182	0.126841		3	0.022781	0.0981457		4	0.004371	0.457646		5	0.009066	0.470431
1	0.008617	1.61348		2	0.03789	0.0777888		3	0.026145	0.19301		4	0.011691	0.254103		5	0.00913	0.192433
1	0.010219	0.193632		2	0.040795	0.211252		3	0.026826	0.160719		4	0.015364	0.944614		5	0.009628	0.515429
1	0.010449	0.245429		2	0.05723	0.0493711		3	0.030382	0.0580712		4	0.017681	0.447363		5	0.009973	0.115208
1	0.010969	0.00716666		2	0.066351	1.06193		3	0.030509	0.0478533		4	0.01815	0.0385944		5	0.010256	0.209549
1	0.011493	0.758681		2	0.068457	0.742645		3	0.032608	0.191876		4	0.018632	0.455738		5	0.011145	0.604022
1	0.011696	0.245429		2	0.069008	0.30654		3	0.034164	0.564935		4	0.021506	0.0198608		5	0.011211	0.387165
1	0.012584	0.417961		2	0.069432	0.090549		3	0.038218	1.32545		4	0.022096	0.257816		5	0.011414	0.479374
1	0.012659	0.2539		2	0.069598	0.105163		3	0.038447	0.187904		4	0.022573	0.0339548		5	0.011754	0.312093
1	0.013045	0.676107		2	0.070249	1.97254		3	0.041804	0.0261137		4	0.023222	0.927204		5	0.011944	0.450118
1	0.014385	0.0931478		2	0.071642	0.316902		3	0.044099	0.269642		4	0.023355	0.711932		5	0.013514	0.158467
1	0.019819	0.693573		2	0.072058	1.01452		3	0.044736	0.0306044		4	0.023633	0.529301		5	0.014284	0.284354
1	0.020892	0.0325442		2	0.072539	0.00480481		3	0.045059	0.00945427		4	0.025462	0.609154		5	0.014441	0.0311885
1	0.021043	0.32405		2	0.073074	0.478805		3	0.045416	0.0850987		4	0.025766	1.33012		5	0.014615	0.378197
1	0.021128	0.158489		2	0.073116	0.624112		3	0.046839	0.203589		4	0.027665	0.680824		5	0.019453	0.149525
1	0.021829	0.253049		2	0.074088	0.0834566		3	0.046968	0.382191		4	0.029674	0.687547		5	0.0215	0.207631
1	0.022522	0.103551		2	0.074635	0.501347		3	0.047215	0.0509886		4	0.030108	0.696636		5	0.02302	0.206466
1	0.023838	0.034639		2	0.075978	0.291861		3	0.047535	0.16361		4	0.030407	0.540109		5	0.027214	0.204206
1	0.025315	0.20103		2	0.076134	0.671014		3	0.049398	0.0457083		4	0.032116	0.23586		5	0.027343	0.071065
1	0.025365	0.116761		2	0.07631	0.539777		3	0.049571	0.00953461		4	0.036446	0.288619		5	0.027721	0.224228
1	0.025773	0.866935		2	0.077634	0.276418		3	0.053767	0.0822581		4	0.037226	0.462471		5	0.028385	0.0513104
1	0.026288	0.103377		2	0.078565	0.41988		3	0.054885	0.00953461		4	0.037319	0.324381		5	0.031079	0.138921
1	0.027265	0.909674		2	0.078958	0.532128		3	0.055635	0.848529		4	0.037577	0.131946		5	0.032221	0.465494
1	0.028948	0.279418		2	0.079128	0.155204		3	0.056047	0.358062		4	0.04096	0.823922		5	0.03225	0.00420866
1	0.028978	0.370412		2	0.079708	0.23752		3	0.056555	0.0566423		4	0.041028	1.15722		5	0.033233	0.573001
1	0.029291	0.656375		2	0.079962	0.51527		3	0.056807	0.415725		4	0.041764	0.950644		5	0.03358	0.303763
1	0.030529	0.034639		2	0.080137	0.311188		3	0.057407	0.0972734		4	0.042326	0.126105		5	0.034028	0.90414
1	0.030683	0.034639		2	0.080228	0.510725		3	0.05778	0.0877592		4	0.042584	0.918477		5	0.034392	0.4717
1	0.031515	0.188759		2	0.080356	0.461705		3	0.058114	0.0174163		4	0.042642	0.846384		5	0.034691	0.410969
1	0.031926	0.0347165		2	0.080495	0.580337		3	0.058346	0.137105		4	0.042919	0.0205154		5	0.036462	1.14569
1	0.03221	0.198548		2	0.080723	0.311188		3	0.059032	0.190639		4	0.043148	1.28642		5	0.036833	0.451515
1	0.032807	0.47733		2	0.080789	0.665674		3	0.059497	0.783402		4	0.044058	0.207773		5	0.037376	0.0222259
1	0.034125	0.034639		2	0.080818	0.538402		3	0.061218	0.0515397		4	0.047673	0.0581431		5	0.037815	0.0627858
1	0.034599	0.00716666		2	0.081127	2.35498		3	0.061477	0.0159318		4	0.047909	1.09444		5	0.038109	0.184723
1	0.035856	0.114581		2	0.081342	0.0935843		3	0.061772	0.068969		4	0.048051	0.298281		5	0.03858	0.380868
1	0.037072	0.610038		2	0.081563	0.197895		3	0.062096	0.141522		4	0.048272	0.481932		5	0.039513	0.328663
1	0.038946	0.0249041		2	0.081613	0.253662		3	0.062216	0.455836		4	0.048298	0.0480752		5	0.039789	0.323913
1	0.039751	0.149272		2	0.08175	0.530627		3	0.063393	0.369168		4	0.048813	0.386528		5	0.039873	0.178614
1	0.041178	1.10338		2	0.081886	0.581075		3	0.06358	0.0141452		4	0.048919	1.06752		5	0.040306	0.0264945
1	0.041427	1.11775		2	0.081914	0.374918		3	0.064824	0.0827482		4	0.049644	0.52566		5	0.041228	0.362505
1	0.044567	0.105858		2	0.08258	0.253662		3	0.065817	0.354531		4	0.049807	0.979262		5	0.041648	0.410483
1	0.045075	0.00584967		2	0.082809	2.40665		3	0.065996	0.301351		4	0.050027	0.861217		5	0.041964	0.0135729
1	0.04558	0.175916		2	0.082934	0.276193		3	0.066603	0.225195		4	0.051796	2.41873		5	0.041997	0.142827
1	0.045683	1.21837		2	0.083103	1.87893		3	0.069268	0.0564928		4	0.052885	1.69012		5	0.042104	0.0711827
1	0.046373	0.191458		2	0.083234	0.539314		3	0.070128	0.00626088		4	0.053896	0.823834		5	0.042314	0.758821
1	0.046499	1.56865		2	0.083262	0.138736		3	0.070545	0.400128		4	0.054125	0.667197		5	0.043002	0.16977
1	0.046912	0.325603		2	0.083533	0.40576		3	0.071143	0.435839		4	0.055489	0.388952		5	0.043839	0.280809
1	0.047577	0.0578249		2	0.083554	0.25899		3	0.072096	0.0557395		4	0.056374	0.103539		5	0.044	0.26963
1	0.047692	0.693546		2	0.083795	0.627807		3	0.074169	0.108524		4	0.059278	0.156474		5	0.044235	0.108588
1	0.048118	1.4405		2	0.084	0.530407		3	0.074405	0.373731		4	0.061884	0.0774104		5	0.044502	0.693496
1	0.048181	0.631136		2	0.084037	0.478805		3	0.077175	0.369622		4	0.062062	0.381541		5	0.045037	0.198517
1	0.04908	0.58561		2	0.084615	0.226163		3	0.077505	0.433617		4	0.062217	0.0791764		5	0.045228	0.0259181
1	0.051392	0.194721		2	0.086107	1.25318		3	0.077597	0.331327		4	0.062368	0.324263		5	0.045308	0.496816
1	0.051706	0.382935		2	0.088461	0.973242		3	0.078632	0.155145		4	0.0629	0.120389		5	0.045456	0.203287
1	0.051878	0.034639		2	0.088866	0.298828		3	0.078916	0.218354		4	0.063166	0.309728		5	0.04577	0.146678
1	0.052202	0.0348487		2	0.091203	1.07779		3	0.079525	0.0342925		4	0.063374	0.376331		5	0.045885	0.26963
1	0.053183	0.307336		2	0.092516	1.07674		3	0.079573	0.0217181		4	0.063749	0.15545		5	0.045987	0.329924
1	0.053729	0.209441		2	0.092756	0.272696		3	0.080528	0.0750204		4	0.065029	0.137969		5	0.046168	0.410598
1	0.053901	0.130656		2	0.093291	0.40396		3	0.080622	0.602336		4	0.065741	0.465726		5	0.046777	0.708518
1	0.055684	0.31853		2	0.093777	1.13323		3	0.080699	0.0708096		4	0.066944	0.327121		5	0.046941	0.18989
1	0.057136	0.172568		2	0.093818	1.06448		3	0.080725	0.0324335		4	0.067595	0.94662		5	0.047015	0.519055
1	0.057686	0.106623		2	0.094509	1.38701		3	0.080937	0.0184642		4	0.068288	0.167217		5	0.047932	0.92701
1	0.059637	0.573938		2	0.094621	0.98484		3	0.081124	1.006		4	0.069075	0.0661729		5	0.047987	0.148675
1	0.060083	0.651563		2	0.095458	0.675882		3	0.081142	0.322408		4	0.069812	0.158331		5	0.048004	1.18057
1	0.060772	0.982318		2	0.095862	0.952206		3	0.081258	0.581336		4	0.070933	0.0519268		5	0.048077	0.92778
1	0.061122	1.1801		2	0.097587	0.475857		3	0.081306	0.108301		4	0.071066	0.567597		5	0.048703	0.258918
1	0.061266	0.0756335		2	0.097966	0.465816		3	0.081339	0.951281		4	0.071448	0.331154		5	0.048968	0.0109953
1	0.061405	0.492467		2	0.098024	0.185306		3	0.081894	0.545632		4	0.071707	0.200622		5	0.050011	0.629888
1	0.061661	0.324148		2	0.098731	2.21533		3	0.082272	0.318694		4	0.071767	0.494808		5	0.051183	0.467535
1	0.062259	0.042631		2	0.098752	2.12074		3	0.082777	0.412006		4	0.071933	0.111161		5	0.052204	0.698783
1	0.062935	1.91318		2	0.099935	0.911089		3	0.082916	0.0766107		4	0.072008	0.426168		5	0.053153	0.0248146
1	0.063084	0.2493		2	0.100206	0.0716705		3	0.083001	0.055039		4	0.073199	0.0738343		5	0.053229	0.487731
1	0.063645	0.683024		2	0.100348	0.2005		3	0.083198	1.27182		4	0.073251	0.231645		5	0.053429	0.0875462
1	0.063759	0.830064		2	0.100542	0.188115		3	0.083538	0.312078		4	0.073517	0.103989		5	0.053617	0.515876
1	0.063915	0.794459		2	0.101022	1.03658		3	0.085135	0.203861		4	0.075171	0.222913		5	0.053722	0.612558
1	0.064149	1.24322		2	0.102165	0.00427778		3	0.085187	0.439427		4	0.075898	1.48032		5	0.054521	0.397047
1	0.064651	0.0123563		2	0.102672	0.190117		3	0.088508	0.223299		4	0.076238	0.0221788		5	0.054694	0.122251
1	0.06834	0.0749945		2	0.102919	0.0843381		3	0.090774	0.282862		4	0.076357	0.518295		5	0.054924	0.0842156
1	0.06888	0.44126		2	0.104217	0.0593501		3	0.090815	0.357542		4	0.076409	0.438648		5	0.054938	0.281249
1	0.069311	0.643525		2	0.104434	0.215085		3	0.091052	0.251983		4	0.076475	0.549526		5	0.055889	0.315283
1	0.070933	0.497339		2	0.105664	0.867984		3	0.091325	0.650164		4	0.076615	0.427312		5	0.056405	0.499765
1	0.071326	0.446671		2	0.106117	0.543852		3	0.091411	0.608878		4	0.076964	0.286878		5	0.057408	0.0358069
1	0.071348	0.568863		2	0.107505	0.448592		3	0.092117	0.569053		4	0.078406	0.589027		5	0.057605	0.0331811
1	0.071868	0.645789		2	0.108183	0.284728		3	0.092418	0.00637811		4	0.078683	0.548179		5	0.058304	0.532207
1	0.072138	0.034639		2	0.108597	0.443673		3	0.092744	0.722538		4	0.080617	0.728364		5	0.058448	0.793183
1	0.072756	0.553412		2	0.10888	0.259851		3	0.092971	0.290334		4	0.080841	0.385477		5	0.058897	0.152678
1	0.072894	0.424754		2	0.108975	0.035214		3	0.094431	0.0374801		4	0.081334	1.08332		5	0.059103	0.498231
1	0.072924	0.034639		2	0.110845	0.527445		3	0.094834	0.519199		4	0.082507	0.610717		5	0.05931	0.0439747
1	0.073047	0.457551		2	0.111267	0.258045		3	0.09542	0.576002		4	0.082605	0.186911		5	0.059697	0.0687016
1	0.073467	0.169627		2	0.112063	0.386484		3	0.095769	0.195946		4	0.082673	0.405627		5	0.059878	0.00959724
1	0.073691	1.15358		2	0.114175	0.579797		3	0.095948	0.709654		4	0.082957	0.232496		5	0.060259	0.0342439
1	0.073851	0.340048		2	0.114479	0.951804		3	0.09609	0.231449		4	0.084003	0.291455		5	0.060399	0.0478096
1	0.073989	0.340048		2	0.115564	0.86687		3	0.096385	0.886102		4	0.084018	0.291455		5	0.060531	0.318216
1	0.074169	0.0184146		2	0.116876	0.646089		3	0.097418	0.392783		4	0.08405	0.339868		5	0.060934	0.00262796
1	0.074707	0.034639		2	0.118895	0.406689		3	0.097909	0.528513		4	0.08407	0.788335		5	0.061216	0.150663
1	0.075481	0.808275		2	0.119449	0.233913		3	0.098583	1.03584		4	0.084974	0.317116		5	0.061235	0.448138
1	0.075721	0.113908		2	0.119519	0.683793		3	0.099152	0.701254		4	0.084994	0.0741799		5	0.061817	0.87159
1	0.075899	0.304801		2	0.120486	0.189626		3	0.099623	0.533575		4	0.085019	1.21113		5	0.062078	0.736128
1	0.076188	0.445275		2	0.120672	0.368097		3	0.099836	0.41547		4	0.085566	0.532421		5	0.062256	1.12374
1	0.076217	0.998892		2	0.120948	0.376105		3	0.099921	0.98951		4	0.086642	0.0369632		5	0.062296	0.56149
1	0.076847	0.0145373		2	0.121071	0.628285		3	0.100086	0.405009		4	0.086711	0.797464		5	0.062655	0.234653
1	0.076879	0.122166		2	0.121404	1.12868		3	0.100602	0.512484		4	0.086805	0.138573		5	0.062812	0.460304
1	0.077127	0.742299		2	0.12159	0.0622688		3	0.10084	0.450845		4	0.087255	0.215562		5	0.063601	0.311175
1	0.07714	0.0657478		2	0.123187	0.224441		3	0.101797	0.499011		4	0.087435	0.308533		5	0.063817	0.0274417
1	0.077243	0.277483		2	0.123262	0.426613		3	0.102093	0.38299		4	0.088365	0.277327		5	0.064387	0.00707798
1	0.077458	0.18201		2	0.123532	0.107191		3	0.102255	0.293286		4	0.088763	0.15015		5	0.066415	0.436298
1	0.078803	0.548918		2	0.123653	0.129996		3	0.102969	0.309501		4	0.088832	1.06312		5	0.072051	0.0699689
1	0.078975	0.187027		2	0.124927	0.761073		3	0.103676	0.00905272		4	0.088925	0.330283		5	0.072401	0.54479
1	0.079418	0.456334		2	0.126555	0.115092		3	0.10372	0.245816		4	0.088983	0.411026		5	0.073297	0.0396064
1	0.080216	0.497512		2	0.128418	0.110809		3	0.103802	0.605167		4	0.089476	0.39911		5	0.07458	0.501624
1	0.080374	0.314506		2	0.128543	0.357837		3	0.103823	0.110467		4	0.089491	0.147066		5	0.074614	0.368911
1	0.0804	0.354904		2	0.128964	0.124026		3	0.103965	0.126829		4	0.090048	0.169698		5	0.075399	0.206515
1	0.081068	0.0209925		2	0.129109	0.229333		3	0.104091	0.837113		4	0.091169	0.419964		5	0.075587	1.11822
1	0.081496	0.237086		2	0.129268	0.883185		3	0.10413	1.16428		4	0.091662	0.397979		5	0.075733	0.0722947
1	0.081854	0.403626		2	0.129448	0.767201		3	0.104166	0.180214		4	0.091802	0.0040622		5	0.075803	0.505597
1	0.081869	0.222383		2	0.131134	0.521553		3	0.104271	0.395234		4	0.09234	0.385684		5	0.07682	0.201529
1	0.082197	0.189735		2	0.134343	0.126013		3	0.104405	0.142684		4	0.092684	0.340387		5	0.077162	0.0963309
1	0.08229	0.059545		2	0.13449	0.337006		3	0.104421	0.432886		4	0.092906	0.63139		5	0.077561	0.268651
1	0.083117	0.18067		2	0.137159	0.540224		3	0.105058	0.36829		4	0.094582	0.117732		5	0.080278	0.0370396
1	0.083177	0.831239		2	0.13726	0.442885		3	0.105288	0.461906		4	0.094801	0.263353		5	0.081994	0.144227
1	0.083219	0.412733		2	0.137433	1.04898		3	0.105819	0.0165992		4	0.09498	0.218653		5	0.083667	0.166893
1	0.084144	0.146388		2	0.138851	1.06299		3	0.105838	0.00736665		4	0.095211	0.113246		5	0.084576	0.0384126
1	0.084379	0.225947		2	0.139479	0.320804		3	0.10606	0.0566531		4	0.0954	0.223351		5	0.085239	0.0484338
1	0.084558	0.11627		2	0.142739	0.241043		3	0.107792	0.062693		4	0.095658	0.750804		5	0.08634	0.0828314
1	0.085561	1.36997		2	0.143193	0.0174918		3	0.10843	0.11729		4	0.095822	0.563871		5	0.089313	0.114096
1	0.08586	0.0777452		2	0.144173	0.000365348		3	0.110471	0.385951		4	0.096279	0.849786		5	0.089797	0.218525
1	0.086656	0.112811		2	0.144219	0.0928024		3	0.111647	0.0428409		4	0.096436	0.160086		5	0.090467	0.440406
1	0.08706	0.327103		2	0.144377	0.388937		3	0.112949	0.114214		4	0.09654	0.754673		5	0.090651	0.073334
1	0.087791	0.680599		2	0.144953	0.977564		3	0.11345	0.527132		4	0.096851	0.644482		5	0.091255	0.443415
1	0.087985	0.0790655		2	0.145185	0.371101		3	0.114059	0.0361503		4	0.097181	0.697081		5	0.09274	0.587556
1	0.0883	0.21538		2	0.145226	0.37287		3	0.114367	0.012738		4	0.097458	0.356496		5	0.094272	0.216919
1	0.088658	0.831863		2	0.14555	0.276092		3	0.114475	0.0582727		4	0.097499	0.0277009		5	0.094974	0.574753
1	0.089312	0.346171		2	0.146013	2.95838		3	0.114753	0.000774117		4	0.097882	0.683753		5	0.095429	0.543407
1	0.090606	0.690031		2	0.146066	1.07324		3	0.117453	0.0203435		4	0.097968	0.372323		5	0.095617	0.0762659
1	0.092353	0.126838		2	0.146345	0.939663		3	0.117981	0.494593		4	0.0981	0.711519		5	0.09565	0.00960931
1	0.092507	0.363727		2	0.146396	1.24545		3	0.118015	0.438273		4	0.098235	0.711519		5	0.097574	0.302753
1	0.092866	0.0907012		2	0.146895	0.804142		3	0.119781	1.11454		4	0.09841	0.705242		5	0.097632	0.0493927
1	0.093562	0.118424		2	0.147035	3.92314		3	0.119974	0.358075		4	0.098568	0.249933		5	0.097888	0.146425
1	0.09374	0.118291		2	0.147264	0.117803		3	0.120886	1.00134		4	0.098682	0.45872		5	0.09821	0.112543
1	0.0938	0.341376		2	0.147837	0.814667		3	0.121259	0.0922148		4	0.098781	0.0039412		5	0.098424	0.637712
1	0.095018	0.107306		2	0.14806	0.190605		3	0.121396	0.238109		4	0.099026	0.0897914		5	0.098766	0.123222
1	0.095225	0.823106		2	0.148353	1.10582		3	0.121642	0.234321		4	0.099514	0.309233		5	0.099031	0.0322676
1	0.095386	0.435343		2	0.149064	2.11254		3	0.122731	0.512174		4	0.099759	0.382314		5	0.099238	0.32978
1	0.095749	0.107032		2	0.149254	0.321818		3	0.123281	0.581629		4	0.09986	0.23369		5	0.099466	0.195413
1	0.096521	0.763215		2	0.149398	0.0844374		3	0.12333	0.547855		4	0.103337	0.00894436		5	0.100044	0.218921
1	0.096726	0.0244863		2	0.149692	0.208978		3	0.123438	0.131165		4	0.103795	0.064715		5	0.101072	0.285339
1	0.09677	0.0932951		2	0.150627	0.551119		3	0.124382	0.42526		4	0.104052	0.144883		5	0.101311	0.0792859
1	0.097473	0.515287		2	0.151189	0.25543		3	0.126986	0.173535		4	0.104266	0.340321		5	0.101384	0.123064
1	0.098317	0.146538		2	0.151273	0.596946		3	0.12708	0.0954676		4	0.104508	0.0942448		5	0.101738	0.140844
1	0.098617	0.118962		2	0.151343	0.335057		3	0.128122	0.315681		4	0.104836	0.187878		5	0.102506	0.089547
1	0.099001	0.0320213		2	0.151415	0.261688		3	0.128362	0.21618		4	0.106988	0.433969		5	0.102709	0.043339
1	0.099456	0.269687		2	0.151709	0.127016		3	0.128433	0.0554113		4	0.108025	0.0940112		5	0.102914	0.19732
1	0.099757	0.641476		2	0.152431	0.0377815		3	0.128538	0.0209458		4	0.108295	0.0374639		5	0.102978	0.0801111
1	0.099785	0.113988		2	0.152591	1.2567		3	0.128755	0.176334		4	0.108509	0.0435984		5	0.103131	0.0930772
1	0.099805	0.148351		2	0.153545	0.473788		3	0.128807	0.507093		4	0.10853	0.086345		5	0.103155	0.0930772
1	0.100267	0.422336		2	0.153631	0.502228		3	0.128886	1.06833		4	0.108843	0.0435984		5	0.103333	0.0342475
1	0.100314	0.390198		2	0.154223	0.301006		3	0.129286	0.472676		4	0.109403	0.833171		5	0.104155	0.0275401
1	0.100501	0.991077		2	0.154749	0.287695		3	0.129912	0.0993275		4	0.109715	0.0252475		5	0.104911	0.0426275
1	0.100832	0.344957		2	0.154775	0.544064		3	0.13	0.102276		4	0.109843	0.04412		5	0.10502	0.0831146
1	0.103175	0.319856		2	0.154824	0.581253		3	0.130145	0.202344		4	0.110743	0.00289809		5	0.105165	0.115994
1	0.103453	0.0141327		2	0.15492	0.126271		3	0.131316	0.98798		4	0.11084	0.0280021		5	0.105298	0.793592
1	0.103654	1.06297		2	0.154938	0.5704		3	0.132645	0.834663		4	0.111042	0.200492		5	0.105878	0.115994
1	0.103749	1.06297		2	0.155224	0.581691		3	0.132898	0.0758076		4	0.111578	0.100251		5	0.105972	0.115994
1	0.103963	0.521627		2	0.155258	1.70212		3	0.134351	0.370656		4	0.112007	0.262638		5	0.106274	0.115994
1	0.105029	0.0823146		2	0.155327	0.0486947		3	0.136171	1.7972		4	0.112157	0.378557		5	0.106316	0.322734
1	0.105064	0.342961		2	0.156174	0.305483		3	0.138201	0.700366		4	0.112272	0.26783		5	0.106351	0.053211
1	0.105282	0.142442		2	0.156225	0.323229		3	0.143851	0.0143588		4	0.112481	0.349476		5	0.106646	0.144953
1	0.105894	0.11701		2	0.156448	0.166483		3	0.145429	0.136202		4	0.112582	0.194394		5	0.106893	0.793592
1	0.107585	0.314694		2	0.15686	0.375946		3	0.145622	0.318968		4	0.113123	0.140912		5	0.107247	0.295427
1	0.109472	0.234953		2	0.157053	3.65489		3	0.146508	0.279967		4	0.113276	0.201314		5	0.107521	0.251045
1	0.109627	0.0792887		2	0.157749	1.00176		3	0.149369	0.0324068		4	0.113515	0.21993		5	0.107584	0.627691
1	0.112907	0.130604		2	0.158102	0.2833		3	0.150938	1.82101		4	0.113947	0.245238		5	0.107897	0.0841243
1	0.113076	0.210913		2	0.158696	0.159653		3	0.154973	1.35822		4	0.115879	0.414391		5	0.108746	0.452973
1	0.114187	0.0334601		2	0.158765	1.6726		3	0.156664	0.11238		4	0.116703	0.653953		5	0.109001	0.25261
1	0.114648	0.594326		2	0.158979	0.364862		3	0.161029	0.266411		4	0.117283	0.202989		5	0.109699	0.108322
1	0.114737	0.613724		2	0.159184	0.331594		3	0.16224	0.0373826		4	0.117376	0.18611		5	0.110048	0.0153513
1	0.114915	0.947754		2	0.159209	0.424465		3	0.162816	0.147224		4	0.118486	0.637217		5	0.110864	0.144703
1	0.11532	0.221037		2	0.159309	0.118175		3	0.163128	0.20172		4	0.118529	0.179855		5	0.111921	0.175617
1	0.117199	0.368539		2	0.159818	0.153179		3	0.164144	0.0259486		4	0.119089	0.195524		5	0.112041	0.301924
1	0.117379	0.11572		2	0.159872	0.202222		3	0.16523	0.49031		4	0.119625	0.25493		5	0.112201	0.0480424
1	0.118192	0.565124		2	0.160448	0.571698		3	0.165603	0.386735		4	0.120027	0.135978		5	0.112283	0.0310623
1	0.118441	0.0705428		2	0.160925	0.448346		3	0.165875	1.45657		4	0.121163	0.313461		5	0.112374	0.0494467
1	0.119003	0.21459		2	0.161051	0.33413		3	0.166305	0.5884		4	0.121871	0.057417		5	0.112879	0.50099
1	0.120328	0.0263866		2	0.161382	0.637536		3	0.166491	0.707449		4	0.121942	0.0398555		5	0.114054	0.0533963
1	0.120376	0.411988		2	0.161598	0.423038		3	0.166552	0.148824		4	0.122236	0.183393		5	0.114335	0.263384
1	0.120456	0.100668		2	0.16182	0.809007		3	0.167243	0.0432359		4	0.122676	0.241497		5	0.114804	0.00879237
1	0.120787	0.548549		2	0.162538	0.455872		3	0.167947	0.073453		4	0.123279	0.199512		5	0.114902	0.0423776
1	0.122005	0.0832067		2	0.162725	0.521922		3	0.168154	0.362688		4	0.123464	0.289447		5	0.115238	0.442019
1	0.122503	0.941263		2	0.163083	0.186835		3	0.16863	0.0361169		4	0.123751	0.154141		5	0.115912	0.249204
1	0.122809	0.178107		2	0.163111	0.207537		3	0.170811	0.00714486		4	0.124174	0.115898		5	0.116176	0.0896997
1	0.123313	0.705921		2	0.163497	1.40767		3	0.175659	0.021013		4	0.124713	0.297506		5	0.117498	0.130889
1	0.123924	0.619401		2	0.16415	0.229436		3	0.1772	0.719673		4	0.124943	0.216664		5	0.11846	0.292632
1	0.125155	0.882715		2	0.164375	0.126938		3	0.178043	0.228163		4	0.125237	0.0919093		5	0.12019	0.305251
1	0.126251	0.446187		2	0.165036	0.0192194		3	0.178071	0.229295		4	0.125397	0.751946		5	0.120316	0.294002
1	0.127093	0.577267		2	0.16631	0.227277		3	0.178789	0.289412		4	0.125493	1.54902		5	0.120332	0.155476
1	0.127891	0.608801		2	0.166668	0.45612		3	0.179977	0.188718		4	0.12563	0.676631		5	0.12043	0.251464
1	0.128116	0.106417		2	0.167441	0.646146		3	0.180363	0.0225117		4	0.125866	0.00444406		5	0.12084	0.301341
1	0.128366	0.0463198		2	0.167647	0.282087		3	0.180526	0.0111892		4	0.127005	0.0263673		5	0.121246	0.649514
1	0.129025	0.106097		2	0.167716	0.650516		3	0.18179	0.0263399		4	0.127703	0.0559139		5	0.121521	1.23935
1	0.131281	0.411422		2	0.168816	0.121057		3	0.181838	0.433828		4	0.127856	0.409703		5	0.122103	0.1194
1	0.132276	0.0362483		2	0.169729	0.816883		3	0.184	0.0228507		4	0.128121	0.145466		5	0.122547	0.13921
1	0.132773	0.0743779		2	0.169989	0.125824		3	0.184954	0.862866		4	0.128422	0.808604		5	0.122671	0.00260427
1	0.132898	0.0723692		2	0.170202	1.5204		3	0.185878	0.00173273		4	0.128881	0.803811		5	0.12338	0.0154919
1	0.133144	0.125792		2	0.170351	0.495761		3	0.186033	0.336882		4	0.128905	0.21462		5	0.124705	0.0758476
1	0.133186	0.779887		2	0.172244	0.290232		3	0.186194	0.174319		4	0.130278	0.830561		5	0.125595	0.579142
1	0.133607	0.0949952		2	0.172482	0.187016		3	0.188039	0.195242		4	0.131413	1.32504		5	0.125814	0.627096
1	0.133626	0.642903		2	0.172548	0.049445		3	0.188837	0.0456973		4	0.13168	1.02732		5	0.12588	0.359984
1	0.133701	0.642903		2	0.172584	0.0534015		3	0.18903	0.0840013		4	0.131771	0.528098		5	0.126368	0.25643
1	0.134063	0.271281		2	0.172629	0.0534015		3	0.189227	0.0191985		4	0.131861	0.709778		5	0.126935	0.391765
1	0.135519	0.194231		2	0.172813	0.130049		3	0.189479	0.038062		4	0.132619	0.648218		5	0.127059	0.255826
1	0.136188	0.455488		2	0.172931	1.21515		3	0.189928	0.0526915		4	0.134753	0.220541		5	0.127073	0.337538
1	0.136211	0.15621		2	0.17298	0.201946		3	0.190615	0.0974492		4	0.135091	0.116256		5	0.127913	0.0292047
1	0.136399	0.447114		2	0.17332	0.085438		3	0.193541	0.314056		4	0.135769	0.0200116		5	0.128192	0.212697
1	0.136467	0.363546		2	0.173442	0.0374999		3	0.194175	1.07292		4	0.136	0.0689517		5	0.128527	0.0126892
1	0.136773	0.132909		2	0.173651	0.0456586		3	0.195339	0.559814		4	0.136508	1.08729		5	0.128963	0.0806387
1	0.137104	0.380628		2	0.173823	0.104906		3	0.195886	0.372756		4	0.136958	0.630826		5	0.129348	0.283886
1	0.137134	0.108146		2	0.173858	0.0221632		3	0.198118	0.10573		4	0.137449	0.317863		5	0.130078	0.561128
1	0.137545	0.0389079		2	0.174115	0.0516539		3	0.198298	0.204498		4	0.138623	0.259023		5	0.132657	0.486061
1	0.13806	0.174498		2	0.174364	0.295013		3	0.198422	0.460183		4	0.1387	1.18104		5	0.133236	0.656576
1	0.138335	0.553516		2	0.174885	0.0202405		3	0.198638	0.152675		4	0.139846	0.123543		5	0.133498	0.771377
1	0.138627	0.0167185		2	0.17496	0.167635		3	0.198824	0.0749575		4	0.14043	0.144108		5	0.133553	0.771377
1	0.138875	0.169843		2	0.175289	0.239855		3	0.199212	0.0643844		4	0.140885	0.177911		5	0.134123	0.869265
1	0.138989	0.0557776		2	0.175529	1.2302		3	0.199376	0.0921147		4	0.140919	0.345053		5	0.13425	0.475732
1	0.139393	0.0898104		2	0.175874	0.326977		3	0.20023	0.0254964		4	0.141179	0.878339		5	0.134797	0.615459
1	0.139832	0.0340399		2	0.176156	0.261943		3	0.201334	0.306733		4	0.141645	0.257502		5	0.135048	0.286242
1	0.139991	0.00827696		2	0.176616	0.207273		3	0.201857	0.506745		4	0.141854	0.0161887		5	0.135315	0.373679
1	0.140005	0.00827696		2	0.176666	0.0870298		3	0.202256	0.00554583		4	0.141982	0.0700096		5	0.135642	0.69296
1	0.140671	0.37012		2	0.178596	0.886394		3	0.203271	0.15585		4	0.142943	0.0349708		5	0.135697	0.0888883
1	0.141411	0.133781		2	0.178849	0.15127		3	0.203611	0.326328		4	0.143157	0.149508		5	0.136109	0.615684
1	0.141556	0.0813429		2	0.180461	0.705877		3	0.204358	1.01795		4	0.143184	0.0793566		5	0.136465	0.00650646
1	0.14294	0.2226		2	0.18048	0.796342		3	0.205067	0.230942		4	0.14322	0.277644		5	0.136521	0.934298
1	0.143199	0.645626		2	0.180942	0.183242		3	0.205339	0.0209636		4	0.143569	0.235599		5	0.136648	0.196563
1	0.143272	0.384239		2	0.18103	1.37327		3	0.205627	0.493639		4	0.143708	0.616927		5	0.136789	0.17334
1	0.143471	0.210657		2	0.182538	0.366472		3	0.205691	0.0302184		4	0.143929	0.584166		5	0.137392	0.767601
1	0.143509	0.0396918		2	0.182818	0.397195		3	0.206921	0.239807		4	0.143994	0.163421		5	0.13772	0.00378696
1	0.143704	0.0474358		2	0.182841	0.247817		3	0.207101	0.0418736		4	0.144124	0.286189		5	0.138237	0.223587
1	0.144331	0.223037		2	0.184364	0.865875		3	0.207454	1.28045		4	0.144227	0.77085		5	0.138596	0.575029
1	0.144392	0.3038		2	0.185018	1.03439		3	0.207898	0.99899		4	0.144603	0.660654		5	0.138977	0.355487
1	0.14441	0.0405519		2	0.186236	0.109538		3	0.208329	0.445498		4	0.145365	0.201919		5	0.139211	0.0730881
1	0.144832	0.118699		2	0.186947	0.392284		3	0.209073	0.175979		4	0.145828	0.121864		5	0.139243	0.380547
1	0.144872	0.0841323		2	0.187048	1.5841		3	0.209307	0.344738		4	0.146048	0.0154587		5	0.139635	0.698153
1	0.145457	0.23108		2	0.187084	0.953633		3	0.209717	0.254401		4	0.14607	0.121864		5	0.140031	0.186005
1	0.14622	0.526041		2	0.187383	1.45266		3	0.210977	0.22918		4	0.146233	0.952624		5	0.140121	0.478107
1	0.14722	0.195984		2	0.187747	1.53377		3	0.212444	0.563366		4	0.146351	0.111692		5	0.140158	0.0261536
1	0.147236	0.282109		2	0.189659	0.418671		3	0.21249	0.270457		4	0.146801	0.0172102		5	0.140173	0.397815
1	0.148601	0.266799		2	0.189683	0.0399827		3	0.212719	0.631888		4	0.146942	0.281904		5	0.140393	0.268733
1	0.14899	0.118843		2	0.190634	0.558049		3	0.213305	0.117808		4	0.147388	0.19383		5	0.140425	0.128367
1	0.15043	0.121475		2	0.191136	0.226943		3	0.21374	0.177631		4	0.147422	0.893315		5	0.140532	1.29925
1	0.150457	0.31974		2	0.191181	0.377351		3	0.213989	0.204506		4	0.1475	0.207694		5	0.140852	0.727856
1	0.150992	0.336065		2	0.191716	0.0554715		3	0.214212	0.142405		4	0.147682	0.15204		5	0.140893	0.0924767
1	0.151942	0.0582153		2	0.191913	0.318431		3	0.214302	0.183147		4	0.147757	0.166969		5	0.141163	0.137241
1	0.153104	0.0679853		2	0.192482	0.245254		3	0.214523	0.204506		4	0.148006	0.203479		5	0.141355	0.910573
1	0.153232	0.0190659		2	0.192676	0.166298		3	0.214737	0.01572		4	0.148257	0.00818959		5	0.14165	0.00689246
1	0.155442	0.231405		2	0.193364	0.00203041		3	0.216126	0.132876		4	0.148691	0.25604		5	0.14168	0.0367558
1	0.155984	0.166873		2	0.194546	0.109758		3	0.216222	0.260286		4	0.149374	0.379932		5	0.141854	0.105979
1	0.156619	0.212006		2	0.198408	0.291344		3	0.217405	0.380726		4	0.151132	0.858479		5	0.142022	0.110127
1	0.157491	0.374767		2	0.199672	0.0219089		3	0.217753	0.173696		4	0.151983	1.27578		5	0.142115	0.622843
1	0.157974	1.13525		2	0.202467	0.193261		3	0.218241	0.0556418		4	0.15216	0.303563		5	0.142225	0.418096
1	0.158134	0.290079		2	0.203117	0.372231		3	0.219118	0.454691		4	0.152199	0.0206079		5	0.142431	0.43623
1	0.158305	0.00317448		2	0.203192	0.185945		3	0.219451	0.561326		4	0.152604	0.157471		5	0.142651	0.239812
1	0.15864	0.00501861		2	0.203286	0.00343992		3	0.220186	0.111158		4	0.152626	0.518523		5	0.142716	0.177484
1	0.15891	0.605963		2	0.204027	0.0265461		3	0.220342	0.989791		4	0.15264	0.302145		5	0.142882	1.14999
1	0.163082	0.119903		2	0.204325	0.157643		3	0.22061	0.350797		4	0.152736	0.793806		5	0.143548	0.758084
1	0.163492	0.392977		2	0.204522	0.169397		3	0.220761	0.145617		4	0.152913	0.0073278		5	0.143873	2.18099
1	0.163569	0.306532		2	0.204596	0.518691		3	0.221049	0.106555		4	0.153069	0.287074		5	0.143924	0.295676
1	0.163766	0.283728		2	0.204935	0.133032		3	0.221262	0.244082		4	0.15326	0.293113		5	0.144213	0.613132
1	0.164085	0.206272		2	0.205036	1.2434		3	0.221359	0.0703936		4	0.153374	0.746333		5	0.144647	0.539354
1	0.16431	0.072111		2	0.205338	0.250677		3	0.221593	0.0591598		4	0.153402	0.193624		5	0.14501	0.419658
1	0.164375	0.00188553		2	0.205446	0.876175		3	0.22188	0.0885007		4	0.153459	0.596932		5	0.145027	0.562922
1	0.164393	0.00805536		2	0.205489	0.0284652		3	0.222522	0.444983		4	0.154217	0.80232		5	0.145051	0.568862
1	0.164553	0.117848		2	0.206117	0.0718721		3	0.22278	0.862001		4	0.154273	0.221766		5	0.145211	0.388264
1	0.164679	0.0976495		2	0.207344	0.117778		3	0.222802	0.132116		4	0.154586	0.633699		5	0.145324	0.239589
1	0.164815	0.072111		2	0.207433	0.54038		3	0.223018	1.38499		4	0.154732	0.634883		5	0.145559	0.306764
1	0.164969	0.175222		2	0.210149	0.115239		3	0.223088	0.339124		4	0.15523	0.17515		5	0.145732	0.24434
1	0.165386	0.125113		2	0.210357	0.104646		3	0.223271	0.833766		4	0.155452	0.935464		5	0.145807	0.483466
1	0.165625	0.411315		2	0.212442	0.277921		3	0.223463	0.073259		4	0.155605	0.67674		5	0.146104	0.852914
1	0.165984	0.101635		2	0.212787	1.12724		3	0.223495	0.702649		4	0.155944	0.0486676		5	0.146119	0.244606
1	0.16603	0.302928		2	0.212833	0.387914		3	0.223734	0.702649		4	0.156416	0.0773041		5	0.146319	0.209364
1	0.166386	0.323228		2	0.21436	0.57146		3	0.223794	2.18742		4	0.156611	0.240437		5	0.146732	0.728061
1	0.16685	0.102298		2	0.214861	0.153687		3	0.223958	0.274579		4	0.156727	0.382836		5	0.146958	0.63216
1	0.167493	0.195649		2	0.215794	0.477741		3	0.223989	0.397372		4	0.156944	0.814028		5	0.147146	0.598485
1	0.167692	0.00911401		2	0.215873	0.465265		3	0.224644	0.116746		4	0.157143	2.21599		5	0.147448	0.895527
1	0.169429	0.0978938		2	0.219015	0.232707		3	0.224782	0.272868		4	0.157895	0.961028		5	0.147655	0.190826
1	0.169883	0.191185		2	0.220105	0.995096		3	0.224795	0.702765		4	0.157909	1.92072		5	0.147799	0.41878
1	0.170066	0.227536		2	0.220163	0.113774		3	0.224811	0.301207		4	0.158115	0.000887239		5	0.148106	0.800162
1	0.170122	0.330728		2	0.220283	0.834784		3	0.225389	0.621335		4	0.158366	0.334663		5	0.149337	0.218622
1	0.170319	0.36641		2	0.220523	0.345443		3	0.225995	0.334844		4	0.158429	0.46476		5	0.149878	0.140285
1	0.171538	0.621732		2	0.22112	0.372608		3	0.226856	1.06744		4	0.158958	0.176952		5	0.150438	0.265983
1	0.171664	0.358966		2	0.221351	0.0306787		3	0.230974	0.790588		4	0.159321	0.857157		5	0.150566	0.525311
1	0.171736	0.0149574		2	0.223962	0.0301928		3	0.231967	0.0990668		4	0.159808	0.167995		5	0.151469	1.2244
1	0.172182	0.196279		2	0.226103	1.05142		3	0.233871	0.292588		4	0.16022	1.22916		5	0.1525	0.0222162
1	0.173042	0.134911		2	0.226667	0.118779		3	0.234016	0.660595		4	0.160421	1.02217		5	0.152898	0.703832
1	0.173373	0.124955		2	0.226792	0.622283		3	0.235313	0.774908		4	0.161142	1.02211		5	0.152975	1.13699
1	0.173531	0.431158		2	0.227746	0.313516		3	0.235376	0.546297		4	0.16122	1.01397		5	0.153081	0.00549414
1	0.173644	0.244049		2	0.229036	0.814833		3	0.23568	0.156238		4	0.161496	1.00332		5	0.153458	0.500392
1	0.173963	1.00388		2	0.229114	1.78056		3	0.236573	0.288946		4	0.161528	0.283258		5	0.153669	0.289704
1	0.174791	0.324285		2	0.229337	1.69085		3	0.236884	0.258373		4	0.162202	1.36601		5	0.1537	0.41246
1	0.174829	0.109901		2	0.230134	1.59524		3	0.237688	0.28677		4	0.162418	0.0258703		5	0.154259	0.474648
1	0.175125	0.00949949		2	0.230549	2.0733		3	0.238163	0.231507		4	0.164754	0.625389		5	0.155351	4.58123
1	0.175723	0.031151		2	0.230838	0.608199		3	0.238467	0.147725		4	0.164926	1.04621		5	0.155508	0.990357
1	0.176636	0.0636857		2	0.231617	1.07013		3	0.238954	0.117422		4	0.165576	0.828283		5	0.15608	1.14221
1	0.177232	0.112326		2	0.231798	1.37429		3	0.239128	0.285543		4	0.165873	0.73259		5	0.156934	0.782258
1	0.177611	0.373417		2	0.232004	1.46025		3	0.240901	0.595589		4	0.165982	0.818296		5	0.157124	0.823312
1	0.178094	0.176835		2	0.232053	1.46025		3	0.241242	0.471208		4	0.166085	0.893957		5	0.157244	0.271712
1	0.178636	0.0056099		2	0.232384	1.15256		3	0.241577	0.139413		4	0.167142	0.469823		5	0.157987	0.962031
1	0.179209	0.0594688		2	0.233301	0.139415		3	0.241763	0.686441		4	0.167468	0.226086		5	0.158199	0.0895088
1	0.179332	0.247435		2	0.234619	0.886431		3	0.241926	0.192007		4	0.167868	0.0502972		5	0.162333	0.562371
1	0.179597	0.221187		2	0.234713	0.582583		3	0.24202	0.371898		4	0.168673	0.324387		5	0.163257	0.0740754
1	0.179753	0.0626881		2	0.235271	1.23057		3	0.24236	0.0873981		4	0.168741	0.800266		5	0.163374	0.0576868
1	0.180123	0.116002		2	0.236458	0.167969		3	0.242505	0.209733		4	0.169566	0.452622		5	0.163643	0.0638473
1	0.180336	0.217116		2	0.236946	1.32894		3	0.242604	0.297045		4	0.170508	0.567881		5	0.165428	0.329174
1	0.181466	0.554719		2	0.23763	0.9451		3	0.24377	0.563678		4	0.170579	0.053302		5	0.165775	0.27973
1	0.182057	0.199948		2	0.238071	0.507388		3	0.247546	0.296196		4	0.170801	1.2375		5	0.167564	0.162382
1	0.182696	0.173365		2	0.238278	0.920796		3	0.247931	0.31936		4	0.171225	0.974501		5	0.167604	0.0251694
1	0.183655	0.458706		2	0.238359	0.837693		3	0.248889	0.0292504		4	0.171611	0.752497		5	0.16773	0.0557963
1	0.18369	0.133731		2	0.238434	0.60302		3	0.249047	0.132155		4	0.171982	0.719898		5	0.168281	0.785158
1	0.183848	0.817573		2	0.238581	0.188844		3	0.251778	0.00193517		4	0.17201	0.0805227		5	0.168563	0.184438
1	0.184074	0.10992		2	0.239383	1.79243		3	0.252036	0.288634		4	0.172373	0.843249		5	0.16867	0.781694
1	0.184847	0.0163456		2	0.240355	1.41452		3	0.253044	0.195453		4	0.173617	0.220433		5	0.170132	0.0557963
1	0.185264	0.0951279		2	0.240518	1.15176		3	0.254466	0.174128		4	0.173755	0.23469		5	0.170562	0.0783639
1	0.185783	0.401226		2	0.242509	0.748103		3	0.254523	0.00411251		4	0.17399	0.346278		5	0.17156	0.573909
1	0.190481	0.033661		2	0.242635	1.09229		3	0.255411	0.459529		4	0.174228	0.782395		5	0.171767	0.89157
1	0.19202	0.110906		2	0.242801	1.50208		3	0.25669	0.155656		4	0.174339	0.906228		5	0.171964	0.879781
1	0.192523	0.157391		2	0.24365	0.804145		3	0.256713	0.290113		4	0.174522	0.373856		5	0.172552	0.0186129
1	0.197163	0.267318		2	0.244699	0.651832		3	0.256732	0.19603		4	0.174681	0.651087		5	0.173019	0.713553
1	0.197462	0.19075		2	0.244779	0.0466765		3	0.256894	0.461305		4	0.175788	0.0874796		5	0.173753	0.980401
1	0.19748	0.14725		2	0.249482	0.807782		3	0.257026	0.15583		4	0.176464	0.152013		5	0.174895	0.0626
1	0.197787	0.229408		2	0.249541	1.32992		3	0.257181	0.295404		4	0.176985	0.0826595		5	0.176323	0.719891
1	0.197963	0.306622		2	0.249876	0.00953782		3	0.257407	0.220601		4	0.177047	0.642425		5	0.178879	0.0484129
1	0.198087	0.0842242		2	0.250152	0.276367		3	0.257543	0.18694		4	0.177424	0.800547		5	0.179934	0.699935
1	0.198236	0.0144821		2	0.250559	0.503358		3	0.257593	0.315912		4	0.177937	0.481468		5	0.18067	1.2947
1	0.198692	0.05823		2	0.250861	0.308048		3	0.258128	0.0722435		4	0.177985	0.693598		5	0.180764	0.273319
1	0.198923	0.289602		2	0.251174	0.102058		3	0.258232	0.250547		4	0.178047	0.191186		5	0.181569	1.60147
1	0.199485	0.0480187		2	0.251628	1.29306		3	0.258532	0.446612		4	0.178108	1.5303		5	0.184733	0.664613
1	0.199514	0.00632809		2	0.252686	0.0716662		3	0.258729	0.0448302		4	0.178342	0.00835962		5	0.186636	0.325611
1	0.200612	0.355305		2	0.253227	0.0113158		3	0.258889	0.169641		4	0.178538	0.0202062		5	0.187433	0.32374
1	0.201086	0.261105		2	0.254964	0.467996		3	0.259461	0.857705		4	0.178564	1.18189		5	0.18888	0.770667
1	0.201161	0.196315		2	0.256357	0.708416		3	0.259977	0.0122291		4	0.178598	0.836017		5	0.189767	0.0765825
1	0.20165	0.267172		2	0.256723	0.0461577		3	0.261241	0.164296		4	0.17882	0.486022		5	0.190081	0.065184
1	0.201754	0.068714		2	0.25681	0.503659		3	0.261471	0.052709		4	0.179174	0.0268847		5	0.190798	0.00469418
1	0.202392	0.64088		2	0.256825	0.757026		3	0.261543	0.635309		4	0.179508	0.385506		5	0.191694	0.363247
1	0.203023	0.0120434		2	0.257212	2.18054		3	0.261716	0.517662		4	0.179908	0.796997		5	0.192079	0.27433
1	0.203108	0.177674		2	0.257326	1.43673		3	0.262185	0.640389		4	0.179996	0.216608		5	0.192196	0.837113
1	0.205622	0.507246		2	0.259051	0.495349		3	0.262282	0.790361		4	0.180467	0.262706		5	0.193233	0.664258
1	0.20571	0.1647		2	0.259215	0.00358729		3	0.262397	0.540099		4	0.180793	2.05853		5	0.193426	0.705073
1	0.205871	0.0602406		2	0.260329	0.0678459		3	0.262452	0.755861		4	0.180919	0.00998341		5	0.19346	0.604031
1	0.207062	0.0642113		2	0.260584	0.0806943		3	0.262512	0.836629		4	0.181066	1.86182		5	0.193641	0.846771
1	0.207099	0.224145		2	0.263653	1.596		3	0.262605	0.774143		4	0.181303	0.0748625		5	0.193856	0.537269
1	0.207154	0.102244		2	0.268254	1.0195		3	0.263131	0.071119		4	0.181484	1.86463		5	0.194546	0.264191
1	0.207187	0.379976		2	0.271146	0.491591		3	0.263329	0.160015		4	0.181946	1.20978		5	0.195082	0.130356
1	0.207938	0.16113		2	0.271181	0.749558		3	0.263625	0.135578		4	0.18237	1.04077		5	0.195379	0.438104
1	0.208251	0.266857		2	0.272156	0.109039		3	0.263967	0.0811335		4	0.182626	1.10256		5	0.19711	0.128448
1	0.208851	0.0263249		2	0.272606	0.903669		3	0.264042	0.0473772		4	0.183229	1.13846		5	0.197347	0.350684
1	0.208903	0.0443238		2	0.272689	0.263478		3	0.264202	0.114043		4	0.183407	0.539289		5	0.1979	0.296557
1	0.210424	0.293836		2	0.273075	0.678752		3	0.265102	0.1078		4	0.183513	0.669731		5	0.197945	0.187447
1	0.210823	0.336035		2	0.275576	0.121631		3	0.265158	0.0224344		4	0.183674	0.612989		5	0.198071	0.0420461
1	0.211861	0.312596		2	0.27608	1.19668		3	0.265185	0.00421692		4	0.183836	0.455858		5	0.199604	0.552805
1	0.21244	0.0627742		2	0.276136	1.20941		3	0.265236	0.395007		4	0.184094	0.355378		5	0.20054	0.366846
1	0.214841	0.587138		2	0.277219	0.743574		3	0.267277	0.183281		4	0.184223	0.936403		5	0.200899	0.179536
1	0.215174	0.158207		2	0.278488	0.4097		3	0.267889	0.64596		4	0.185717	0.56208		5	0.201344	0.767633
1	0.215591	0.00138027		2	0.279147	0.298597		3	0.268087	0.994293		4	0.185936	0.269217		5	0.202009	0.12646
1	0.216233	0.167319		2	0.279642	0.771997		3	0.268427	0.262945		4	0.186173	0.144226		5	0.20376	0.673833
1	0.216654	0.00290144		2	0.283865	0.157713		3	0.268519	0.411946		4	0.186722	0.997352		5	0.203933	0.665441
1	0.219412	0.368473		2	0.284337	0.79402		3	0.269459	1.71333		4	0.18693	2.40804		5	0.204559	0.31516
1	0.21984	0.0362155		2	0.285905	0.102467		3	0.269766	0.150743		4	0.187099	1.46853		5	0.204663	0.508677
1	0.220127	0.735342		2	0.286177	0.0796205		3	0.27133	0.666247		4	0.187613	0.139012		5	0.205245	0.630772
1	0.22086	0.0228464		2	0.286986	0.279116		3	0.271465	0.741891		4	0.189065	0.936821		5	0.207851	0.477774
1	0.221441	0.0199533		2	0.287833	0.404841		3	0.272081	0.672061		4	0.189527	1.83762		5	0.207993	0.806952
1	0.221965	0.727921		2	0.287861	0.305629		3	0.272795	0.0177151		4	0.189739	1.05762		5	0.208044	0.806952
1	0.222616	0.251159		2	0.288174	0.123607		3	0.274662	0.0581065		4	0.190004	1.32276		5	0.208062	0.806952
1	0.222932	0.735342		2	0.288516	0.0491974		3	0.274928	0.171637		4	0.190041	0.112034		5	0.208371	1.13903
1	0.223037	0.0456315		2	0.289184	0.531181		3	0.275233	0.498533		4	0.190299	0.162057		5	0.208734	0.999097
1	0.223306	0.322797		2	0.289385	1.09924		3	0.275927	1.21252		4	0.190671	0.378826		5	0.209253	0.0469246
1	0.223623	1.19026		2	0.289448	0.347958		3	0.277155	0.308302		4	0.191384	2.47656		5	0.209723	1.32719
1	0.223752	1.09168		2	0.289608	0.283278		3	0.278195	0.180666		4	0.19148	0.76324		5	0.20983	0.0899601
1	0.2238	0.497486		2	0.291428	0.547124		3	0.278502	1.16357		4	0.191735	0.517393		5	0.210176	0.0120752
1	0.225129	0.0672061		2	0.293853	1.49537		3	0.2786	0.365006		4	0.192492	0.869896		5	0.210456	0.564099
1	0.225675	0.440278		2	0.298516	0.950245		3	0.278884	0.33866		4	0.19251	0.890924		5	0.212151	0.768628
1	0.225936	0.605179		2	0.299382	0.00755662		3	0.279016	0.443087		4	0.192592	0.906672		5	0.21332	0.0859896
1	0.226046	0.197621		2	0.300126	0.0087785		3	0.279177	0.229433		4	0.192744	0.0748621		5	0.213647	0.0579775
1	0.228318	0.741323		2	0.300285	0.0189902		3	0.279336	0.204246		4	0.192885	0.512506		5	0.215437	0.0588216
1	0.228432	0.931369		2	0.303149	0.032563		3	0.280499	0.209105		4	0.194455	0.367306		5	0.215484	0.396719
1	0.229618	0.516994		2	0.303993	0.210972		3	0.281348	0.180666		4	0.195618	0.513931		5	0.215509	0.396719
1	0.232666	0.561102		2	0.304084	0.313518		3	0.281673	0.180666		4	0.19605	0.732956		5	0.215574	0.382612
1	0.233534	0.0430707		2	0.304331	0.424791		3	0.281956	0.276311		4	0.19616	0.270486		5	0.215797	0.444751
1	0.23471	0.0420532		2	0.305737	0.18928		3	0.282102	0.121329		4	0.196188	0.473576		5	0.216214	0.0118115
1	0.235122	0.542684		2	0.30582	0.427382		3	0.282508	0.308334		4	0.196524	0.534866		5	0.216295	0.246878
1	0.235189	0.128413		2	0.305867	0.297318		3	0.282944	0.267813		4	0.196614	0.553902		5	0.217546	0.277512
1	0.23668	0.0662802		2	0.305983	0.745042		3	0.283073	0.233703		4	0.196786	0.494582		5	0.217922	0.246435
1	0.237838	0.113297		2	0.306106	0.188797		3	0.283155	1.19626		4	0.196902	0.265376		5	0.219459	0.20058
1	0.238042	1.76368		2	0.306729	0.388116		3	0.283331	0.250742		4	0.197103	0.523023		5	0.220056	0.0215555
1	0.238792	0.155421		2	0.308751	0.582176		3	0.283546	0.135686		4	0.19757	0.219961		5	0.220662	1.80932
1	0.238928	0.609219		2	0.3092	0.00139568		3	0.283817	0.138593		4	0.198176	0.480598		5	0.220776	1.29246
1	0.239657	0.502654		2	0.309446	0.324555		3	0.284291	0.265705		4	0.198893	0.459415		5	0.22149	1.18193
1	0.239739	0.0865479		2	0.311254	0.523727		3	0.284542	0.0631433		4	0.199214	0.645749		5	0.221558	1.85632
1	0.240061	0.0209023		2	0.311553	0.120552		3	0.284775	0.195496		4	0.199605	0.27944		5	0.221931	1.65424
1	0.24018	0.711847		2	0.314815	0.452661		3	0.284829	0.0627185		4	0.199798	0.0810928		5	0.222133	1.85632
1	0.24044	1.83398		2	0.314948	0.0505333		3	0.284893	0.365932		4	0.199812	0.761545		5	0.222425	1.93379
1	0.240478	1.28156		2	0.315258	0.080372		3	0.285445	0.180666		4	0.200026	0.0737522		5	0.223106	1.85632
1	0.241299	0.0308735		2	0.315963	0.721543		3	0.285892	0.180666		4	0.201471	0.614122		5	0.22412	1.85632
1	0.242504	0.477813		2	0.316222	0.17577		3	0.286083	1.77283		4	0.201733	0.943232		5	0.226038	2.06558
1	0.242603	0.0706988		2	0.316536	0.23991		3	0.286123	1.6594		4	0.202037	0.68115		5	0.228056	1.09991
1	0.242678	0.588326		2	0.316725	0.466307		3	0.286197	1.19493		4	0.202156	0.345421		5	0.228406	1.19207
1	0.242911	0.461383		2	0.316781	0.769607		3	0.286264	0.385045		4	0.202361	0.769999		5	0.228845	0.757239
1	0.243012	0.639421		2	0.317066	0.546637		3	0.286578	1.26716		4	0.202556	0.865157		5	0.22889	1.14321
1	0.243303	0.0762214		2	0.317171	0.465912		3	0.286869	0.742706		4	0.20318	0.0566748		5	0.229632	1.25514
1	0.24347	0.16046		2	0.317326	0.219083		3	0.287071	0.0513392		4	0.20384	0.769999		5	0.230334	0.044826
1	0.243574	0.16046		2	0.317538	0.394042		3	0.287241	1.23358		4	0.204239	0.265788		5	0.230492	0.303562
1	0.243619	0.16046		2	0.317696	0.180935		3	0.287279	1.02267		4	0.20517	0.176743		5	0.230763	0.0579385
1	0.245038	0.0643671		2	0.318268	0.109204		3	0.287689	1.17581		4	0.205287	0.0181179		5	0.231184	0.701374
1	0.245112	0.659018		2	0.318483	0.695783		3	0.287858	0.684555		4	0.205451	2.26348		5	0.232614	0.313865
1	0.245435	0.427543		2	0.319147	0.0900404		3	0.288393	0.626817		4	0.205776	0.111049		5	0.232923	0.313073
1	0.245558	1.08094		2	0.319733	0.0696477		3	0.28844	0.308302		4	0.206466	0.0995728		5	0.233931	0.301223
1	0.245788	0.407063		2	0.320016	0.458023		3	0.288607	1.03295		4	0.206711	0.74354		5	0.239433	0.404079
1	0.245871	0.41735		2	0.320354	0.274622		3	0.288903	0.442868		4	0.206784	0.0227359		5	0.240101	0.96039
1	0.246084	0.205499		2	0.320527	0.387781		3	0.289038	0.335779		4	0.20682	0.471527		5	0.241895	0.165156
1	0.246174	0.712576		2	0.320829	0.174016		3	0.289208	1.1809		4	0.20719	0.573938		5	0.242013	0.20745
1	0.246425	0.148078		2	0.321401	0.227426		3	0.289269	1.11908		4	0.208388	2.26348		5	0.243851	0.35735
1	0.246561	0.101986		2	0.32157	0.14909		3	0.289602	1.15227		4	0.20865	0.0931824		5	0.243878	0.553113
1	0.247065	0.0466657		2	0.321671	0.105962		3	0.290001	0.171637		4	0.209531	0.0244177		5	0.244974	2.23136
1	0.247357	0.141818		2	0.321927	0.134693		3	0.290088	0.550179		4	0.209691	0.943232		5	0.245281	0.667682
1	0.247484	0.148969		2	0.323619	0.25737		3	0.290174	0.912254		4	0.210306	0.708437		5	0.245676	0.226145
1	0.247683	0.496116		2	0.32379	0.115416		3	0.290849	0.426349		4	0.21037	0.1646		5	0.246623	2.6562
1	0.247814	0.182719		2	0.323817	0.0696477		3	0.291089	1.06391		4	0.210657	0.266533		5	0.247163	0.512622
1	0.24785	0.152284		2	0.323887	0.0305659		3	0.29147	0.599687		4	0.212222	0.0415162		5	0.248004	2.34298
1	0.248261	0.779551		2	0.324301	0.262511		3	0.291539	0.144486		4	0.212406	0.381347		5	0.248453	0.693331
1	0.248737	0.212246		2	0.324508	0.0549464		3	0.291639	0.370075		4	0.212793	0.0752889		5	0.248628	0.450894
1	0.249083	0.144685		2	0.325354	0.945154		3	0.291826	1.42663		4	0.214344	0.530386		5	0.252017	0.659529
1	0.249256	0.195673		2	0.325469	0.842755		3	0.291883	0.0528321		4	0.214857	0.241379		5	0.252805	1.8656
1	0.250096	0.0673059		2	0.325482	0.62762		3	0.292095	0.194642		4	0.214939	0.155483		5	0.253027	1.27754
1	0.250479	0.0141074		2	0.32612	0.688691		3	0.29223	1.43549		4	0.214999	0.0912138		5	0.253122	0.359025
1	0.250624	0.0218372		2	0.326162	0.0149756		3	0.2937	0.453997		4	0.215363	0.334618		5	0.254525	0.339163
1	0.250718	0.00344294		2	0.326313	0.0103118		3	0.293833	0.0953054		4	0.215705	0.537563		5	0.254949	1.04087
1	0.250934	0.0428253		2	0.326873	0.161955		3	0.294344	0.855004		4	0.216077	1.60363		5	0.255239	0.284719
1	0.251145	0.11834		2	0.326984	0.812362		3	0.294425	0.627722		4	0.216231	2.38239		5	0.256007	0.141021
1	0.251256	0.100986		2	0.327169	0.447894		3	0.294649	0.535801		4	0.216421	0.588483		5	0.256618	2.14262
1	0.252095	0.123261		2	0.327572	0.159808		3	0.294854	0.596986		4	0.21662	1.32778		5	0.257068	0.24126
1	0.252243	0.077589		2	0.328389	0.656007		3	0.295062	0.596986		4	0.217035	0.310112		5	0.257586	0.429356
1	0.252841	0.0329207		2	0.329168	0.585027		3	0.295527	0.195496		4	0.217684	0.0930016		5	0.258123	0.901336
1	0.252953	0.449039		2	0.329782	0.420812		3	0.295668	0.860533		4	0.218028	0.109888		5	0.258737	0.0294984
1	0.252967	0.054215		2	0.330377	0.1096		3	0.295934	0.416128		4	0.218368	1.0288		5	0.259554	0.355558
1	0.253289	0.00527529		2	0.331207	0.295112		3	0.29648	0.431433		4	0.218724	0.0182825		5	0.259662	0.827599
1	0.253378	2.31612		2	0.331248	0.487244		3	0.296729	0.06615		4	0.219312	1.17759		5	0.259737	0.3483
1	0.25394	0.417278		2	0.33165	0.288653		3	0.296899	0.156005		4	0.219648	0.304901		5	0.261103	0.0520372
1	0.254004	0.0569137		2	0.331796	0.781324		3	0.297374	0.160404		4	0.219919	0.31197		5	0.261187	2.02427
1	0.254311	0.0826784		2	0.331844	0.898997		3	0.300268	0.126524		4	0.220486	0.970062		5	0.261641	1.40873
1	0.25438	0.179165		2	0.332353	0.450586		3	0.300504	0.0685068		4	0.220713	0.00916021		5	0.262214	0.155799
1	0.255333	0.0256422		2	0.332458	0.472782		3	0.301036	0.101047		4	0.221548	1.31901		5	0.26246	1.66563
1	0.255849	0.101188		2	0.332705	0.378978		3	0.301589	0.109148		4	0.221625	1.3264		5	0.262765	0.469968
1	0.256039	0.0190726		2	0.332732	0.531832		3	0.301905	0.437819		4	0.223865	0.183831		5	0.263782	0.630161
1	0.256194	0.364691		2	0.332778	0.547447		3	0.302012	0.136723		4	0.224275	0.103007		5	0.264138	0.457902
1	0.259953	0.240706		2	0.333261	0.378978		3	0.302247	0.231802		4	0.224747	0.528885		5	0.264287	0.793409
1	0.26001	0.134384		2	0.333332	0.323802		3	0.302902	0.284071		4	0.224997	0.0440022		5	0.264699	0.500493
1	0.260496	0.103132		2	0.333807	0.344425		3	0.305011	0.041562		4	0.226062	1.26565		5	0.265369	0.168796
1	0.26124	0.0153982		2	0.333876	0.344425		3	0.305078	0.00932097		4	0.226981	0.282295		5	0.265442	0.126069
1	0.261416	0.00473288		2	0.333995	0.0201878		3	0.305791	0.020276		4	0.227045	0.519878		5	0.265699	0.0238863
1	0.26183	0.000206096		2	0.334136	0.0365299		3	0.306506	0.724437		4	0.227242	1.07809		5	0.265983	0.12538
1	0.262205	0.797584		2	0.334426	0.0326449		3	0.307883	0.404285		4	0.22726	1.50411		5	0.266095	0.349646
1	0.262864	0.193986		2	0.335309	0.22335		3	0.307977	0.78577		4	0.227668	1.77714		5	0.26613	0.287842
1	0.263787	0.762789		2	0.335497	0.223113		3	0.30813	0.157339		4	0.227703	0.433003		5	0.267758	0.111381
1	0.263895	0.530413		2	0.335628	0.159092		3	0.308299	0.12515		4	0.227896	1.51061		5	0.267915	0.252415
1	0.264845	0.918244		2	0.336299	0.537362		3	0.308761	0.200577		4	0.227988	1.55005		5	0.268502	0.1487
1	0.265099	0.770854		2	0.336351	0.0651605		3	0.309369	0.983583		4	0.22895	1.5802		5	0.268632	0.347087
1	0.265611	0.766122		2	0.338268	0.0448076		3	0.310478	0.538881		4	0.229051	1.55005		5	0.268711	0.10466
1	0.266159	0.305276		2	0.338299	0.821241		3	0.311499	0.730985		4	0.229197	1.64419		5	0.268781	0.0987505
1	0.26651	0.670146		2	0.338576	0.234874		3	0.311572	0.437641		4	0.229496	1.30261		5	0.269687	0.203207
1	0.266733	1.15624		2	0.339202	0.598835		3	0.312146	0.460183		4	0.229719	0.721581		5	0.269906	0.0505702
1	0.266943	0.822108		2	0.33942	0.124254		3	0.313683	0.263769		4	0.229904	1.30261		5	0.270323	0.514424
1	0.267251	1.29711		2	0.339599	0.0230043		3	0.313781	0.282487		4	0.230046	1.43158		5	0.270412	0.110473
1	0.267352	1.08074		2	0.339647	0.358276		3	0.314956	0.060644		4	0.230345	1.30261		5	0.271377	0.2011
1	0.267394	0.0320847		2	0.33973	0.318512		3	0.315482	0.782901		4	0.230466	1.51061		5	0.271526	0.583488
1	0.267458	0.25852		2	0.339891	0.433361		3	0.31551	0.394157		4	0.230824	1.33725		5	0.271648	0.59455
1	0.267925	0.666436		2	0.340243	0.854734		3	0.316788	0.53085		4	0.231023	1.6371		5	0.271814	0.0559379
1	0.268235	0.2765		2	0.340279	0.223863		3	0.317134	0.795078		4	0.231656	0.133965		5	0.271852	0.356678
1	0.268853	0.507049		2	0.340293	0.0721866		3	0.317426	0.0917303		4	0.231692	0.191333		5	0.272238	0.0199785
1	0.269283	0.353394		2	0.340533	0.945859		3	0.318079	0.0581754		4	0.232821	0.101099		5	0.272288	0.345768
1	0.26968	0.0940924		2	0.341168	0.155118		3	0.318101	0.499685		4	0.233034	0.264953		5	0.27235	0.0676373
1	0.271416	0.212931		2	0.341236	0.324487		3	0.318161	0.267136		4	0.233689	1.39904		5	0.272514	0.0492224
1	0.271873	0.00252369		2	0.341468	0.127893		3	0.31891	0.253812		4	0.23407	0.0892408		5	0.272998	0.227854
1	0.27418	0.0695007		2	0.341588	0.502848		3	0.32029	0.158276		4	0.234594	0.388222		5	0.273554	0.40977
1	0.274842	0.12361		2	0.341605	0.570136		3	0.320515	0.0759122		4	0.234728	0.690116		5	0.273698	0.106442
1	0.275147	0.372245		2	0.343705	0.434798		3	0.321563	0.178826		4	0.234825	0.0858161		5	0.273897	0.238827
1	0.275504	0.0651504		2	0.345027	0.21121		3	0.321782	0.310657		4	0.234867	0.356817		5	0.274122	0.124769
1	0.275624	0.246919		2	0.345515	0.0778646		3	0.322905	1.41755		4	0.234921	0.435584		5	0.274309	0.575736
1	0.276649	0.12361		2	0.345816	0.96725		3	0.322932	0.0140458		4	0.235563	0.452049		5	0.274505	0.263323
1	0.277226	0.12361		2	0.346068	0.280145		3	0.323065	0.568616		4	0.235708	0.0321657		5	0.274816	0.329932
1	0.277389	0.185449		2	0.346114	0.271109		3	0.323727	0.865311		4	0.235819	0.0321657		5	0.275011	0.227854
1	0.277613	0.5503		2	0.347127	0.811625		3	0.324278	0.292308		4	0.23588	0.353229		5	0.275156	0.169078
1	0.277659	0.270119		2	0.347331	0.0411176		3	0.32435	1.29587		4	0.236093	0.800397		5	0.275576	0.166379
1	0.277847	0.383593		2	0.34744	0.284413		3	0.324747	0.127718		4	0.236241	0.0321657		5	0.275849	0.227854
1	0.27808	0.11893		2	0.347459	0.138544		3	0.324955	0.0780517		4	0.236464	0.919503		5	0.275986	1.32333
1	0.278383	0.00305501		2	0.347694	0.256762		3	0.325266	0.095033		4	0.236483	0.346049		5	0.276562	0.192323
1	0.278674	0.56227		2	0.349657	0.296559		3	0.325452	0.228933		4	0.236671	0.212696		5	0.27673	0.0804475
1	0.279435	0.219429		2	0.350478	0.743662		3	0.325961	0.460216		4	0.237259	0.0138078		5	0.276851	0.742351
1	0.279531	0.12361		2	0.350512	0.234471		3	0.326537	0.692999		4	0.237937	0.300507		5	0.276976	0.730501
1	0.280584	0.139518		2	0.350664	0.0191449		3	0.326705	0.661892		4	0.238708	0.199811		5	0.277762	0.0261236
1	0.281038	0.0556551		2	0.351125	0.915334		3	0.326878	0.140261		4	0.23887	0.191333		5	0.278008	0.249052
1	0.281312	0.0556551		2	0.351326	0.13659		3	0.327059	0.35689		4	0.239127	0.0821539		5	0.278447	0.271509
1	0.281863	0.0706239		2	0.353123	0.149124		3	0.327083	0.778521		4	0.239275	0.440376		5	0.278488	0.510212
1	0.283155	1.82297		2	0.35442	0.334551		3	0.327109	0.0414351		4	0.240014	0.19682		5	0.278627	0.61048
1	0.283751	0.12361		2	0.355963	0.0755957		3	0.327588	0.132217		4	0.240539	0.0290284		5	0.280949	0.227695
1	0.2839	0.111375		2	0.356582	0.264789		3	0.327877	0.0923734		4	0.240597	0.439159		5	0.28161	0.0211884
1	0.284444	0.202428		2	0.357003	0.140383		3	0.327928	0.0491391		4	0.242348	0.0235569		5	0.281638	0.0783085
1	0.284815	0.0191059		2	0.357385	0.266885		3	0.328109	0.440639		4	0.242587	0.104242		5	0.281978	0.101116
1	0.284989	0.218844		2	0.357661	0.175081		3	0.328699	0.0613759		4	0.242847	0.506637		5	0.282008	0.293591
1	0.285111	0.381865		2	0.357825	0.038059		3	0.329231	0.0908725		4	0.242906	0.56781		5	0.282301	0.128307
1	0.285729	0.332639		2	0.357864	0.305768		3	0.332094	0.152751		4	0.244182	0.0888415		5	0.282726	0.108574
1	0.28716	0.276522		2	0.357891	0.973335		3	0.334243	0.755117		4	0.244954	0.0421265		5	0.283538	0.447865
1	0.288548	0.504298		2	0.358188	0.273663		3	0.334353	2.11942		4	0.245797	1.63164		5	0.284102	0.73048
1	0.28926	0.0179846		2	0.358314	0.125725		3	0.334938	1.34438		4	0.246493	0.0525978		5	0.28429	0.191261
1	0.289857	0.169392		2	0.358431	0.266885		3	0.3351	0.26917		4	0.246531	0.0393819		5	0.28511	0.145019
1	0.291135	0.269361		2	0.358616	0.1474		3	0.335467	0.366568		4	0.247056	1.48628		5	0.285412	0.455787
1	0.291602	0.253679		2	0.358812	0.176894		3	0.336077	0.0386962		4	0.247215	0.346092		5	0.286359	1.91091
1	0.291796	0.151891		2	0.359329	0.172981		3	0.338236	0.227951		4	0.247745	1.20066		5	0.287127	0.109087
1	0.291938	2.04513		2	0.359466	0.266885		3	0.338529	0.0979495		4	0.247972	0.349065		5	0.288372	0.620335
1	0.292013	1.27478		2	0.359661	0.266885		3	0.33871	0.0236018		4	0.248128	0.259744		5	0.288528	0.426134
1	0.292239	0.832626		2	0.360171	0.261597		3	0.340185	0.28442		4	0.248308	0.111325		5	0.290122	0.216462
1	0.292468	0.0405306		2	0.360381	0.0834618		3	0.341037	0.0431751		4	0.248566	0.89593		5	0.290231	1.46293
1	0.29252	0.71863		2	0.360575	0.169177		3	0.341239	0.115906		4	0.248803	2.0994		5	0.29049	0.712191
1	0.292581	0.00642035		2	0.362467	0.00590028		3	0.341915	0.244976		4	0.24948	0.246502		5	0.290818	0.0883231
1	0.292637	0.743108		2	0.362637	0.102737		3	0.342401	0.390749		4	0.250266	2.92379		5	0.291291	0.0115455
1	0.292671	3.07906e-05		2	0.362752	0.291557		3	0.342531	0.237178		4	0.250918	0.827453		5	0.291445	0.0770071
1	0.293313	0.63372		2	0.362943	0.04689		3	0.342814	0.556877		4	0.251347	0.769081		5	0.292133	0.597174
1	0.294899	0.0499389		2	0.363239	0.443996		3	0.343813	0.169755		4	0.251443	0.769081		5	0.293314	1.25346
1	0.296724	0.0277395		2	0.363478	0.943823		3	0.343859	0.0621137		4	0.251653	0.674401		5	0.29389	1.16343
1	0.296776	0.79241		2	0.363508	0.0469961		3	0.344078	0.0673339		4	0.251732	0.67369		5	0.295645	0.215708
1	0.297946	0.420362		2	0.364421	0.098043		3	0.344866	0.955474		4	0.252249	0.399813		5	0.295874	0.890345
1	0.298086	0.0551963		2	0.36486	0.955385		3	0.345295	0.401297		4	0.25227	0.367244		5	0.296001	0.372069
1	0.302575	0.0667054		2	0.365177	0.0412731		3	0.34538	0.275291		4	0.252374	0.802502		5	0.296164	0.108467
1	0.304281	0.10396		2	0.365337	0.0806665		3	0.345692	0.000715331		4	0.252856	0.383034		5	0.29638	0.0468987
1	0.304565	0.0238401		2	0.365472	0.272976		3	0.345885	0.113411		4	0.253125	0.744143		5	0.296585	0.0810693
1	0.304984	0.305305		2	0.365577	0.0433628		3	0.346286	0.0909448		4	0.253154	1.01516		5	0.296789	1.00085
1	0.305362	0.244571		2	0.36932	0.104355		3	0.346578	0.385945		4	0.254137	1.6573		5	0.297421	0.0111746
1	0.305431	0.063168		2	0.369488	0.111121		3	0.347207	0.20294		4	0.254697	0.848671		5	0.297456	0.786319
1	0.30624	0.143447		2	0.370684	0.0706578		3	0.347558	0.196066		4	0.254732	0.31182		5	0.298226	0.215708
1	0.306663	0.533176		2	0.373171	1.08655		3	0.347628	0.626676		4	0.254976	0.0745828		5	0.29825	0.166063
1	0.306874	0.143447		2	0.373223	0.464021		3	0.348986	0.321162		4	0.255443	0.834496		5	0.299473	0.0246581
1	0.307266	0.251007		2	0.373317	0.0713289		3	0.349066	0.116377		4	0.255586	0.926923		5	0.300272	0.123843
1	0.307847	0.0407846		2	0.373931	0.326364		3	0.349144	0.123574		4	0.255686	0.0749805		5	0.301858	0.303272
1	0.30837	0.0414096		2	0.373977	0.0641		3	0.349859	0.546994		4	0.256012	0.277695		5	0.301906	0.457337
1	0.309185	0.0897711		2	0.374236	0.017243		3	0.350227	0.125324		4	0.256073	1.30701		5	0.302042	0.00615865
1	0.30997	0.373963		2	0.374448	0.072947		3	0.350763	0.365709		4	0.257533	1.06614		5	0.302849	0.670238
1	0.310925	0.439293		2	0.374531	0.295855		3	0.350917	0.400655		4	0.257795	0.810762		5	0.303504	0.408691
1	0.311064	0.249981		2	0.374968	0.269347		3	0.351234	0.520097		4	0.257828	1.00677		5	0.303855	1.36727
1	0.31161	0.416684		2	0.375028	0.0464001		3	0.351649	0.16249		4	0.257861	0.0505481		5	0.304372	0.954427
1	0.311769	0.158905		2	0.375052	0.0932909		3	0.351737	0.18175		4	0.259103	0.374749		5	0.305673	0.718012
1	0.313381	0.181613		2	0.375218	0.0209452		3	0.352571	0.112305		4	0.259252	0.060957		5	0.307056	0.442808
1	0.316941	0.275543		2	0.375282	0.106411		3	0.352743	0.127536		4	0.259825	0.241916		5	0.307183	0.550281
1	0.317357	1.34302		2	0.375417	0.197858		3	0.353357	0.789596		4	0.260906	0.275555		5	0.307237	0.839871
1	0.317402	0.308029		2	0.375549	1.02004		3	0.353572	0.427944		4	0.261007	0.0932741		5	0.308662	0.104863
1	0.318255	1.26229		2	0.375882	0.011994		3	0.353668	0.427944		4	0.261231	0.483009		5	0.308973	0.292934
1	0.319963	0.0435616		2	0.375929	0.147543		3	0.353923	1.41407		4	0.261357	0.148271		5	0.309003	0.43113
1	0.320474	0.330849		2	0.376265	0.0793416		3	0.35442	0.489859		4	0.261938	0.596509		5	0.30925	0.00807565
1	0.321016	1.26229		2	0.376451	0.0632462		3	0.354691	0.690005		4	0.262398	0.657612		5	0.309835	0.697647
1	0.321057	0.186401		2	0.377884	0.186283		3	0.354842	0.246133		4	0.263734	1.07491		5	0.30993	0.622376
1	0.321615	0.0778629		2	0.378022	0.25854		3	0.354964	0.480799		4	0.264064	1.30397		5	0.31034	0.503486
1	0.321897	0.10856		2	0.378148	0.570103		3	0.355398	0.458697		4	0.264307	1.29221		5	0.310446	0.108791
1	0.323072	0.116342		2	0.378275	0.0869508		3	0.356542	0.902144		4	0.264496	0.821092		5	0.310573	0.590259
1	0.327241	1.37211		2	0.378651	0.355667		3	0.356721	0.982543		4	0.264585	1.07491		5	0.310675	0.19607
1	0.328445	0.325261		2	0.379441	0.0241496		3	0.356934	0.0760073		4	0.264798	1.15003		5	0.310738	0.0685288
1	0.331177	0.0117849		2	0.379653	0.208907		3	0.357216	0.473963		4	0.264971	1.67522		5	0.310891	0.230594
1	0.331771	0.0231116		2	0.382631	0.379908		3	0.357589	0.0416679		4	0.265043	0.538466		5	0.311368	0.215796
1	0.332266	0.00868982		2	0.383216	0.509236		3	0.357704	0.690672		4	0.265445	1.07491		5	0.311389	0.262691
1	0.333482	0.0670822		2	0.38335	0.166417		3	0.35794	0.0612749		4	0.265711	1.07491		5	0.311461	0.329681
1	0.335469	0.225858		2	0.383691	1.49046		3	0.358237	0.0842337		4	0.265884	1.07491		5	0.311856	0.298693
1	0.33599	0.0499908		2	0.386798	0.673833		3	0.360627	0.72862		4	0.266072	0.803164		5	0.312291	0.446907
1	0.336311	1.06777		2	0.386885	0.777239		3	0.361335	0.131775		4	0.266261	1.29059		5	0.31234	0.353384
1	0.338382	0.502026		2	0.386978	0.755216		3	0.361806	0.0649056		4	0.26633	1.07491		5	0.31263	0.107495
1	0.338744	0.0424113		2	0.388193	0.190836		3	0.362913	0.0896336		4	0.266533	0.703249		5	0.313842	0.590957
1	0.339305	0.862303		2	0.388581	1.22548		3	0.363062	0.0645076		4	0.266546	0.220509		5	0.314428	0.153421
1	0.341196	0.251668		2	0.388788	2.10128		3	0.363182	0.112606		4	0.267169	0.949611		5	0.315239	0.295139
1	0.341924	0.151692		2	0.388936	0.587849		3	0.363411	0.794852		4	0.267325	1.12876		5	0.316551	0.387567
1	0.342259	0.0650159		2	0.388998	0.878846		3	0.363506	0.0713219		4	0.267418	1.67522		5	0.317281	0.0181932
1	0.342966	0.0785716		2	0.389097	0.587849		3	0.363893	0.3077		4	0.267612	0.928387		5	0.317592	0.482391
1	0.343125	0.768953		2	0.389609	0.85348		3	0.364793	0.153651		4	0.267761	1.2051		5	0.317793	0.212996
1	0.343449	0.116703		2	0.389715	2.11905		3	0.364982	0.27006		4	0.26899	0.461849		5	0.318185	0.907889
1	0.344235	0.0568708		2	0.390034	1.32315		3	0.365429	0.295477		4	0.269188	0.364307		5	0.318521	0.292506
1	0.345567	0.0138564		2	0.390208	1.38898		3	0.368145	0.0286764		4	0.269245	0.379329		5	0.318742	0.474643
1	0.346038	0.142034		2	0.390265	1.32315		3	0.368178	1.30445		4	0.26926	0.587075		5	0.319362	0.174933
1	0.34897	0.00139747		2	0.390303	1.32315		3	0.368437	0.0720847		4	0.269719	0.00872236		5	0.319921	0.205912
1	0.34931	0.155241		2	0.390852	3.69093		3	0.369508	0.0703101		4	0.270407	1.01643		5	0.321306	0.0266507
1	0.349489	0.134859		2	0.391723	0.465952		3	0.369598	0.172478		4	0.270862	0.686919		5	0.321369	1.30111
1	0.349786	0.280871		2	0.391903	0.108122		3	0.36962	0.30756		4	0.272624	0.724716		5	0.321528	0.0868382
1	0.350432	0.170811		2	0.392628	0.184746		3	0.369787	0.0394902		4	0.272908	0.571821		5	0.321738	0.0750935
1	0.351212	0.153683		2	0.393823	0.52761		3	0.370313	0.0475011		4	0.27303	0.652917		5	0.322227	0.106308
1	0.351393	0.044734		2	0.394241	0.980436		3	0.370386	0.177884		4	0.273116	0.589905		5	0.322933	0.0961713
1	0.351689	0.153394		2	0.397062	0.111891		3	0.370566	0.109597		4	0.273948	0.691664		5	0.323678	0.0549818
1	0.351832	0.0386568		2	0.397757	0.610647		3	0.37163	0.0656761		4	0.274958	0.892251		5	0.325885	0.305423
1	0.352602	0.00567848		2	0.399078	0.396159		3	0.371898	0.28054		4	0.275349	0.5027		5	0.326483	0.247705
1	0.352807	0.0548402		2	0.400091	0.1167		3	0.371964	0.391696		4	0.276143	0.512859		5	0.328021	0.00667131
1	0.353031	0.157801		2	0.401921	0.0563362		3	0.373387	0.366667		4	0.276857	0.146868		5	0.328398	0.314968
1	0.35323	0.0528101		2	0.403752	0.49559		3	0.375032	0.212073		4	0.278393	1.12534		5	0.328595	0.0410847
1	0.353328	0.259753		2	0.405512	0.190983		3	0.377311	0.338403		4	0.279966	0.363534		5	0.328626	0.22055
1	0.355246	0.0437211		2	0.40649	0.268453		3	0.378211	0.483417		4	0.28007	0.742247		5	0.33071	0.288754
1	0.355316	0.461927		2	0.406731	0.890851		3	0.378757	0.412139		4	0.280112	0.383072		5	0.330929	0.142208
1	0.355397	0.210618		2	0.407098	0.631975		3	0.3789	0.442303		4	0.280202	0.480363		5	0.331015	0.581786
1	0.355976	0.653667		2	0.409466	0.472578		3	0.379453	0.3831		4	0.280774	0.187491		5	0.331462	0.223234
1	0.356907	0.491472		2	0.409608	0.384292		3	0.379493	0.220087		4	0.280901	0.972621		5	0.331611	0.718225
1	0.356942	0.1893		2	0.410257	0.635913		3	0.380054	0.16032		4	0.281565	0.646832		5	0.332137	0.013861
1	0.357001	0.128759		2	0.410416	0.221604		3	0.381456	0.512927		4	0.281912	1.17497		5	0.332243	0.659368
1	0.357481	0.210618		2	0.410761	1.71706		3	0.382384	0.859326		4	0.283724	0.0626356		5	0.332703	0.0327509
1	0.359382	0.00346263		2	0.411305	1.31601		3	0.383531	0.000715915		4	0.28586	0.477502		5	0.332753	0.778176
1	0.360888	0.292954		2	0.411459	0.132353		3	0.38375	0.978231		4	0.286082	0.037769		5	0.333411	0.0812856
1	0.3612	0.564765		2	0.413939	0.0658098		3	0.383975	0.796415		4	0.286905	0.735943		5	0.334007	0.0386206
1	0.36215	0.773932		2	0.414206	0.737188		3	0.384295	0.556861		4	0.287481	0.725518		5	0.33592	0.632865
1	0.362211	0.27353		2	0.414545	0.0544494		3	0.384673	0.163796		4	0.287579	0.128426		5	0.336019	0.732826
1	0.362763	0.837635		2	0.414572	0.0170862		3	0.384709	0.583797		4	0.287786	0.307095		5	0.336079	1.88551
1	0.36351	0.0415973		2	0.414863	0.403285		3	0.384967	0.452045		4	0.287861	0.0928998		5	0.336316	0.069585
1	0.363817	0.370554		2	0.414929	0.483637		3	0.385164	0.232623		4	0.288365	0.338188		5	0.33696	0.0129103
1	0.363886	0.0809815		2	0.41521	0.756355		3	0.385179	0.0373139		4	0.288631	0.211235		5	0.337013	0.438196
1	0.36715	0.057919		2	0.415696	0.334322		3	0.385388	0.978231		4	0.288749	0.647257		5	0.33706	0.395051
1	0.367218	0.782199		2	0.415768	0.185506		3	0.385654	0.36826		4	0.28904	0.156363		5	0.338222	0.710878
1	0.367914	0.00607977		2	0.416664	0.153315		3	0.38597	0.098803		4	0.289228	0.482638		5	0.338473	0.866915
1	0.368476	0.347894		2	0.417234	1.05006		3	0.386252	0.203551		4	0.28927	0.592491		5	0.338593	0.726782
1	0.37067	0.0789626		2	0.417461	1.04347		3	0.386421	0.0356681		4	0.289628	0.670797		5	0.338724	0.347433
1	0.37141	0.339961		2	0.418389	0.767404		3	0.387459	0.0442618		4	0.291877	0.223111		5	0.338946	0.529753
1	0.371484	0.0338289		2	0.419659	0.144486		3	0.387818	0.173059		4	0.292391	0.393457		5	0.339009	0.191027
1	0.372172	0.202253		2	0.420824	0.165486		3	0.387933	0.917689		4	0.292979	0.664526		5	0.339023	0.567055
1	0.372205	0.146909		2	0.421014	0.849373		3	0.388106	0.50978		4	0.293535	0.788285		5	0.340054	0.384975
1	0.372809	0.255992		2	0.421707	0.146987		3	0.38894	0.478129		4	0.293686	1.45052		5	0.340187	0.488353
1	0.373097	0.403647		2	0.42233	0.0645945		3	0.390779	0.0737433		4	0.294146	0.568734		5	0.340357	0.770422
1	0.373685	0.0443028		2	0.422354	0.0222804		3	0.391672	1.25302		4	0.294743	0.0635428		5	0.341728	0.839881
1	0.375468	0.744508		2	0.42312	0.183406		3	0.392051	1.80909		4	0.296823	0.143184		5	0.342933	0.462859
1	0.375499	0.335399		2	0.423811	0.772842		3	0.392114	0.294885		4	0.29893	0.12483		5	0.343403	0.809726
1	0.376976	1.17214		2	0.424068	0.484029		3	0.393532	0.242912		4	0.298954	0.374451		5	0.343437	0.776944
1	0.377334	0.56199		2	0.424334	0.416685		3	0.393688	0.53064		4	0.299575	0.0548469		5	0.343492	0.254052
1	0.377825	0.303237		2	0.425191	0.809799		3	0.393867	0.553542		4	0.30056	0.0714506		5	0.343654	0.209856
1	0.378101	0.173776		2	0.426188	0.422696		3	0.394136	0.882474		4	0.300821	0.102939		5	0.343787	0.116304
1	0.379604	0.039845		2	0.426318	0.128347		3	0.394191	0.373332		4	0.300941	0.920657		5	0.343944	0.295468
1	0.381773	0.358523		2	0.426888	0.00427277		3	0.394222	0.907103		4	0.30114	1.3878		5	0.344361	0.265891
1	0.381817	0.361731		2	0.426907	0.418112		3	0.394593	0.94922		4	0.302578	0.446599		5	0.346462	0.107422
1	0.382112	0.321284		2	0.427558	0.537507		3	0.394801	0.751002		4	0.304776	1.20541		5	0.348693	0.26378
1	0.383526	0.471444		2	0.42761	0.34238		3	0.395314	0.54167		4	0.305097	0.0713646		5	0.348973	0.537583
1	0.384584	0.458113		2	0.427624	0.450343		3	0.395929	0.488686		4	0.305603	0.119428		5	0.351205	0.632493
1	0.384674	0.168258		2	0.427933	0.0826504		3	0.396477	0.386904		4	0.306608	0.158019		5	0.351783	0.929713
1	0.388705	0.471676		2	0.427946	0.206944		3	0.396524	0.869198		4	0.307381	0.314703		5	0.352059	0.452407
1	0.389095	0.0972578		2	0.428116	0.940919		3	0.396849	0.208413		4	0.307756	0.233608		5	0.352139	0.646657
1	0.389215	0.552258		2	0.428409	0.273879		3	0.397115	0.0692958		4	0.308062	0.301021		5	0.35281	0.00732358
1	0.389577	0.189721		2	0.42985	0.689323		3	0.397561	0.328778		4	0.308172	0.652881		5	0.353286	0.11491
1	0.389853	0.207218		2	0.43118	0.310269		3	0.397872	0.384937		4	0.308466	0.802403		5	0.353423	0.217821
1	0.389949	0.231562		2	0.43257	0.249962		3	0.398371	1.19468		4	0.30862	0.0588315		5	0.357444	0.122193
1	0.390211	0.175979		2	0.434172	0.123318		3	0.398449	0.0596704		4	0.308951	0.165606		5	0.357657	0.228104
1	0.390415	0.532081		2	0.434869	0.324976		3	0.399009	1.26951		4	0.309005	0.225894		5	0.357895	0.217821
1	0.390542	0.107084		2	0.436074	0.0424141		3	0.399085	0.986718		4	0.309053	0.165606		5	0.357973	0.493038
1	0.390744	0.321288		2	0.436685	0.706117		3	0.399288	0.0794819		4	0.309236	0.165606		5	0.358002	0.17925
1	0.39077	0.246277		2	0.437719	0.207972		3	0.399383	0.879413		4	0.309739	0.818364		5	0.358037	0.360726
1	0.392131	0.613272		2	0.438282	0.131207		3	0.400931	0.702663		4	0.309873	0.165606		5	0.358303	0.686855
1	0.392316	0.0676642		2	0.438757	1.44277		3	0.401328	0.667599		4	0.309933	0.0385111		5	0.358356	0.428345
1	0.392462	0.108147		2	0.44049	0.0208957		3	0.401599	0.364051		4	0.310263	0.243814		5	0.359462	0.37626
1	0.394129	0.446643		2	0.440591	0.114932		3	0.401827	0.152001		4	0.310657	0.254265		5	0.36009	0.101136
1	0.394552	0.146806		2	0.442124	0.00628786		3	0.402032	1.30491		4	0.311082	1.12103		5	0.361546	0.396367
1	0.394881	1.14861		2	0.442838	1.15649		3	0.403593	0.111951		4	0.311212	0.104527		5	0.362838	0.152021
1	0.394901	0.321289		2	0.443958	0.313125		3	0.40362	0.157203		4	0.311401	0.568194		5	0.363049	0.3664
1	0.395368	1.17214		2	0.444029	0.201219		3	0.405025	0.197873		4	0.311665	1.30908		5	0.363103	0.215845
1	0.395787	1.15588		2	0.444122	0.353078		3	0.405362	0.311638		4	0.311852	0.202596		5	0.363428	0.48913
1	0.395878	0.980951		2	0.44507	0.0505704		3	0.405509	0.482938		4	0.311893	0.0691672		5	0.363617	0.122716
1	0.396021	0.00430014		2	0.445767	1.14392		3	0.405763	0.284633		4	0.314389	0.195586		5	0.363783	0.318208
1	0.39613	0.842362		2	0.446437	0.145414		3	0.406972	0.20327		4	0.314461	0.415885		5	0.364413	0.212575
1	0.397173	0.326238		2	0.44654	0.0127703		3	0.407313	0.390682		4	0.31481	0.0125545		5	0.364556	0.71428
1	0.397698	0.612897		2	0.44694	0.776205		3	0.407878	0.073327		4	0.316331	0.677903		5	0.364648	0.21817
1	0.398592	0.702595		2	0.447329	0.447556		3	0.408054	0.162802		4	0.31649	0.308151		5	0.364862	0.390359
1	0.399766	0.864257		2	0.447808	0.174695		3	0.408235	0.0626194		4	0.316605	0.494238		5	0.365124	0.457581
1	0.39992	0.38744		2	0.447949	0.681839		3	0.410822	0.293172		4	0.316976	0.608698		5	0.3653	0.315141
1	0.400145	0.20635		2	0.448335	0.442893		3	0.411199	0.558061		4	0.317129	0.946449		5	0.366025	0.0636373
1	0.400593	0.0448508		2	0.448674	0.46172		3	0.412042	0.362694		4	0.319551	0.677903		5	0.366098	0.113686
1	0.400701	0.491758		2	0.448997	0.417051		3	0.412061	0.316406		4	0.319844	0.599193		5	0.367155	0.118027
1	0.401107	0.479371		2	0.449366	0.240337		3	0.412102	0.386453		4	0.320251	1.22602		5	0.368237	0.0237499
1	0.401532	0.351051		2	0.450839	0.56936		3	0.412277	0.521913		4	0.320507	0.412463		5	0.368964	0.647012
1	0.401762	0.747413		2	0.450883	0.40959		3	0.412447	0.20327		4	0.32063	1.19759		5	0.369362	0.152021
1	0.401894	0.19893		2	0.451547	0.110508		3	0.412674	0.153655		4	0.321264	0.185628		5	0.369595	0.349391
1	0.402676	0.303477		2	0.451645	0.0878344		3	0.413301	0.029516		4	0.321427	0.670463		5	0.370288	0.226986
1	0.402866	0.0925931		2	0.452192	0.433491		3	0.413447	0.29882		4	0.32241	0.0170801		5	0.370336	0.600378
1	0.404038	0.100129		2	0.452304	0.278558		3	0.414596	0.0300873		4	0.323444	0.26163		5	0.370426	0.568362
1	0.404108	1.08822		2	0.453029	0.000165427		3	0.415335	0.395106		4	0.323723	0.275561		5	0.371109	0.256952
1	0.404407	0.434887		2	0.455176	0.309109		3	0.415508	0.671013		4	0.323762	0.359924		5	0.372296	0.213531
1	0.405583	1.01081		2	0.455326	0.184444		3	0.416111	0.255369		4	0.323953	0.0376013		5	0.373134	0.0592806
1	0.40574	0.192124		2	0.455695	0.206871		3	0.416713	1.36674		4	0.325002	0.831439		5	0.37333	0.746031
1	0.407205	1.05055		2	0.455727	0.249472		3	0.417074	0.516201		4	0.325483	0.996574		5	0.3736	0.215378
1	0.408649	0.331552		2	0.456133	0.454674		3	0.41715	0.74698		4	0.325641	0.0129723		5	0.37364	0.110074
1	0.409707	0.159367		2	0.456184	0.221451		3	0.417972	0.0278329		4	0.325931	0.530769		5	0.373699	0.0695499
1	0.410187	0.218821		2	0.456201	0.175831		3	0.418184	0.224072		4	0.327551	0.799961		5	0.374181	0.248791
1	0.410242	0.945326		2	0.456327	0.0878486		3	0.418759	0.100852		4	0.327893	0.0844366		5	0.374334	0.572262
1	0.410463	0.316515		2	0.46063	0.0452992		3	0.419592	0.0534071		4	0.328185	0.105176		5	0.374349	0.572262
1	0.411663	0.330651		2	0.462199	0.220958		3	0.420862	0.0598788		4	0.329392	0.674638		5	0.37449	0.0688474
1	0.411774	0.190415		2	0.462456	0.368861		3	0.42243	0.0203569		4	0.331167	0.0526531		5	0.374876	0.129834
1	0.412423	0.0223854		2	0.462714	0.316929		3	0.423835	2.68732		4	0.331479	0.490105		5	0.375015	0.0771631
1	0.412683	0.170053		2	0.463049	0.161116		3	0.423968	0.0203569		4	0.331506	0.802649		5	0.375523	0.869858
1	0.413335	0.580339		2	0.46355	0.166344		3	0.424283	0.274355		4	0.332184	0.0476776		5	0.375604	0.0450503
1	0.413471	0.695466		2	0.464185	0.18054		3	0.424429	0.0121844		4	0.332542	0.837449		5	0.375808	0.433228
1	0.4138	0.181935		2	0.465339	0.385108		3	0.424453	0.893093		4	0.332954	0.190597		5	0.375901	0.354663
1	0.413817	0.695466		2	0.465972	0.0652425		3	0.424657	0.682867		4	0.333015	0.448025		5	0.376331	0.46726
1	0.413954	0.949241		2	0.469762	1.50579		3	0.424905	0.546036		4	0.333536	0.0729719		5	0.376465	0.612972
1	0.414067	0.650052		2	0.470968	0.0934025		3	0.425176	0.591661		4	0.333645	0.128853		5	0.37661	0.57024
1	0.414212	1.33991		2	0.47121	0.240498		3	0.425302	0.662001		4	0.333888	0.396131		5	0.376649	0.591807
1	0.41436	0.110967		2	0.471585	0.287857		3	0.425458	0.546036		4	0.334104	0.156397		5	0.37672	0.229498
1	0.414453	0.537165		2	0.472382	0.734311		3	0.425636	0.546036		4	0.334652	1.2106		5	0.376895	0.543652
1	0.414782	0.19912		2	0.473128	0.1999		3	0.425693	0.870099		4	0.336	0.0427443		5	0.376981	0.210506
1	0.414962	0.20972		2	0.475755	1.35115		3	0.425721	0.546036		4	0.336078	0.805		5	0.377156	0.404948
1	0.415139	0.00661599		2	0.477275	1.42418		3	0.429181	0.0241409		4	0.336134	0.497542		5	0.377693	0.19856
1	0.415297	0.099941		2	0.478357	0.758277		3	0.429667	0.515176		4	0.337136	0.384178		5	0.377824	0.238513
1	0.415468	0.0479435		2	0.478674	0.650897		3	0.429695	1.3297		4	0.337502	0.103405		5	0.37897	0.0440041
1	0.415588	0.00144746		2	0.479088	0.467864		3	0.429709	0.129011		4	0.338402	0.0122173		5	0.379654	0.200745
1	0.416491	0.228168		2	0.47944	1.04259		3	0.430152	0.501634		4	0.338611	0.364776		5	0.379965	0.184001
1	0.416711	0.418222		2	0.480634	1.2133		3	0.431317	0.335158		4	0.338665	0.246736		5	0.380236	0.166407
1	0.416915	0.293844		2	0.482326	1.27976		3	0.43495	0.387976		4	0.3399	0.0194497		5	0.380501	0.244019
1	0.417004	2.26861		2	0.48286	0.645407		3	0.437367	0.0140686		4	0.340301	0.0194497		5	0.380593	0.38291
1	0.417193	0.701382		2	0.483987	0.373838		3	0.437518	0.628726		4	0.340503	1.06032		5	0.381247	0.231534
1	0.417318	0.415526		2	0.484349	0.455376		3	0.437739	0.0449819		4	0.341989	1.66645		5	0.381291	0.158347
1	0.417733	0.278965		2	0.484404	0.291827		3	0.438716	0.158456		4	0.342205	0.262682		5	0.381923	0.0894821
1	0.417956	0.0686148		2	0.485655	0.133901		3	0.439755	0.438829		4	0.343759	0.0490609		5	0.382333	0.240782
1	0.418434	0.0431151		2	0.486626	1.45525		3	0.441998	0.535969		4	0.345342	0.00409138		5	0.383413	0.428703
1	0.418615	0.0330718		2	0.489148	1.50741		3	0.443594	0.547589		4	0.345362	0.24737		5	0.383484	0.264801
1	0.419133	1.04258		2	0.489484	0.0131552		3	0.444561	0.141624		4	0.347177	0.421844		5	0.38405	0.280596
1	0.41995	0.0579633		2	0.489882	0.404425		3	0.445405	0.138676		4	0.347814	0.574167		5	0.384645	0.235498
1	0.419964	0.128584		2	0.490567	0.431458		3	0.445683	2.87104		4	0.349835	0.900761		5	0.384866	0.280596
1	0.420248	0.380555		2	0.492029	0.973578		3	0.447964	0.138417		4	0.350141	0.0427512		5	0.385079	0.0784169
1	0.420648	0.594325		2	0.492096	0.399076		3	0.44801	0.212264		4	0.350842	0.148775		5	0.385317	0.55425
1	0.420866	0.96638		2	0.493649	0.151605		3	0.44903	0.0913822		4	0.352615	0.20254		5	0.38553	0.367117
1	0.421839	0.263946		2	0.494188	0.325544		3	0.450325	0.210411		4	0.353061	0.00912626		5	0.385714	0.039812
1	0.421914	0.148623		2	0.49432	0.0740222		3	0.450446	0.210411		4	0.353161	0.150735		5	0.385927	0.280596
1	0.422095	0.130985		2	0.494807	1.07328		3	0.450852	0.369888		4	0.353448	0.673726		5	0.385998	0.252161
1	0.422239	0.059596		2	0.49574	0.0380679		3	0.451053	0.398886		4	0.354553	0.43416		5	0.38604	0.313067
1	0.422491	0.644166		2	0.495931	0.142612		3	0.453245	0.577733		4	0.356748	0.461207		5	0.386583	0.522359
1	0.426854	0.084552		2	0.496308	0.402873		3	0.453787	0.288209		4	0.357547	1.09336		5	0.386652	0.0597427
1	0.426998	0.0431982		2	0.497457	0.352023		3	0.454273	0.176128		4	0.35782	0.587194		5	0.387238	0.207735
1	0.427069	0.285062		2	0.49753	0.231965		3	0.455312	0.00279589		4	0.358595	0.0357111		5	0.38878	0.0873969
1	0.427539	0.121678		2	0.497548	0.722328		3	0.455607	0.210447		4	0.359225	0.0975897		5	0.388798	0.0193299
1	0.427813	0.307365		2	0.497851	0.844731		3	0.457118	0.351782		4	0.359348	0.183102		5	0.388945	0.291987
1	0.428014	0.0484811		2	0.497877	0.589502		3	0.45724	0.220871		4	0.359495	0.204373		5	0.389212	0.096869
1	0.428839	0.0273777		2	0.498237	0.43587		3	0.457458	0.0112689		4	0.359824	0.0611093		5	0.389393	0.217556
1	0.429221	0.296861		2	0.498652	0.0516593		3	0.457618	0.50495		4	0.359863	0.39159		5	0.389485	0.752656
1	0.429505	0.699465		2	0.498701	0.0699074		3	0.45925	0.210454		4	0.360393	0.270308		5	0.389808	0.233528
1	0.429703	0.025908		2	0.498787	0.0516593		3	0.459845	0.41567		4	0.360593	0.86588		5	0.390533	0.0106145
1	0.42973	0.200443		2	0.498807	0.168693		3	0.459902	1.10411		4	0.360612	0.258166		5	0.390637	0.0410594
1	0.430076	0.701809		2	0.499026	0.107616		3	0.460712	0.301296		4	0.361065	0.11747		5	0.391285	0.0824138
1	0.430462	0.0417694		2	0.499143	0.0709851		3	0.462992	0.147028		4	0.361319	0.333408		5	0.391926	0.483896
1	0.432102	0.00522494		2	0.499278	0.280098		3	0.463034	0.0150143		4	0.361557	0.323196		5	0.391973	1.34882
1	0.434306	0.0565302		2	0.499314	0.489437		3	0.463563	0.331377		4	0.361813	0.210679		5	0.392157	0.0362859
1	0.434319	0.0978443		2	0.499397	0.155832		3	0.46407	0.308495		4	0.361906	0.0615135		5	0.393578	0.150668
1	0.43462	0.0618366		2	0.499863	0.0819824		3	0.464286	0.436317		4	0.362466	0.0601152		5	0.393596	2.00996
1	0.434762	0.224257		2	0.503583	0.189494		3	0.464853	0.124507		4	0.362506	0.0510007		5	0.39491	0.502706
1	0.435313	0.0276837		2	0.504403	0.217922		3	0.465915	0.00178189		4	0.36269	0.0671689		5	0.395282	0.126937
1	0.435399	0.152543		2	0.504633	0.437832		3	0.466569	0.309303		4	0.362801	0.0257013		5	0.397518	0.0271098
1	0.43542	0.141109		2	0.504842	0.296532		3	0.466632	0.605948		4	0.364035	0.687819		5	0.397847	0.907602
1	0.435473	0.902861		2	0.508062	0.133313		3	0.467926	0.0800479		4	0.364103	0.0339159		5	0.399008	0.211537
1	0.435555	0.109844		2	0.508313	0.127212		3	0.468101	1.54356		4	0.364263	0.233543		5	0.399662	0.381346
1	0.435737	0.0958888		2	0.508568	0.14965		3	0.468982	0.418163		4	0.364286	1.44465		5	0.399979	1.09012
1	0.435815	0.192153		2	0.508583	0.17491		3	0.469564	0.296938		4	0.364566	0.0579873		5	0.400199	0.196518
1	0.43599	0.0667042		2	0.510539	0.375861		3	0.474268	0.00465314		4	0.364888	0.493828		5	0.400612	0.649709
1	0.436113	0.176313		2	0.513032	0.176929		3	0.474952	0.151326		4	0.366123	0.00764653		5	0.400773	0.186682
1	0.436331	0.176313		2	0.51333	0.106905		3	0.475328	0.250748		4	0.366495	0.0103494		5	0.401	0.0297911
1	0.436638	0.197442		2	0.513574	0.352767		3	0.475742	0.680046		4	0.366753	1.17577		5	0.401377	0.0368283
1	0.436777	0.350952		2	0.513819	0.565214		3	0.476107	0.805529		4	0.367819	0.184622		5	0.401469	0.668645
1	0.436962	0.279311		2	0.513878	0.73204		3	0.476523	0.127111		4	0.368106	0.617363		5	0.401518	0.406895
1	0.437174	0.339567		2	0.514251	0.415016		3	0.476723	0.264601		4	0.369042	0.829698		5	0.401578	0.406895
1	0.437189	0.333744		2	0.514644	0.465465		3	0.477128	0.118147		4	0.369406	0.0328939		5	0.402068	0.742182
1	0.438106	0.764344		2	0.517763	0.258981		3	0.477824	0.214857		4	0.369612	0.119874		5	0.402275	0.721848
1	0.438386	0.385063		2	0.518927	0.421336		3	0.479107	0.0508694		4	0.373151	0.130529		5	0.40237	0.320753
1	0.438541	0.497155		2	0.519004	0.115521		3	0.48017	0.0242112		4	0.373349	0.312991		5	0.403039	0.563052
1	0.438688	0.317443		2	0.519323	0.0996021		3	0.48032	0.980668		4	0.373676	0.66898		5	0.403322	0.373719
1	0.438929	1.15831		2	0.5206	0.613668		3	0.482296	0.233421		4	0.373738	0.50834		5	0.403402	0.373719
1	0.439434	1.04718		2	0.523011	0.036665		3	0.482543	0.660782		4	0.374688	0.528697		5	0.403516	0.154821
1	0.439785	0.276961		2	0.524112	0.0574201		3	0.482687	1.23264		4	0.374863	0.0898384		5	0.404079	0.203691
1	0.44014	0.346006		2	0.524448	0.00775096		3	0.482813	0.00374554		4	0.374939	0.0176699		5	0.406012	0.794781
1	0.440434	0.525985		2	0.524464	0.163085		3	0.482963	0.35062		4	0.375126	0.0927714		5	0.407123	0.468267
1	0.44091	1.1957		2	0.52482	0.209873		3	0.483389	0.115737		4	0.375613	0.366281		5	0.407212	0.715001
1	0.441699	0.250824		2	0.525729	0.373825		3	0.483641	0.660782		4	0.376513	0.357483		5	0.407942	0.516341
1	0.441892	0.130717		2	0.525861	0.00905075		3	0.483956	0.190753		4	0.376685	0.174144		5	0.40848	1.77171
1	0.442025	0.189055		2	0.526008	0.174781		3	0.484212	0.437229		4	0.376706	0.375692		5	0.408772	0.199403
1	0.442244	0.864982		2	0.526181	0.212043		3	0.485095	0.242929		4	0.377656	0.38837		5	0.409409	0.155006
1	0.442271	0.0868269		2	0.526712	0.946681		3	0.485647	0.660782		4	0.377881	0.489218		5	0.409582	0.0213449
1	0.442513	0.126724		2	0.527269	0.481423		3	0.485667	0.187009		4	0.377896	0.0810146		5	0.409697	0.214068
1	0.442725	0.0671302		2	0.527714	0.480957		3	0.487165	0.151326		4	0.378017	0.245209		5	0.410589	1.24714
1	0.443412	0.0929183		2	0.528443	0.151078		3	0.487339	0.00945203		4	0.378171	0.736912		5	0.410785	0.126562
1	0.443513	0.20001		2	0.529874	0.241366		3	0.487427	0.017245		4	0.378336	0.216062		5	0.410948	0.538497
1	0.443677	0.165368		2	0.531258	0.453688		3	0.489995	0.661669		4	0.378668	0.461701		5	0.41131	0.877186
1	0.443853	0.0835058		2	0.531915	1.66924		3	0.492185	1.51794		4	0.379678	0.5514		5	0.411457	0.0935294
1	0.444206	0.443775		2	0.532057	0.856086		3	0.492211	0.793354		4	0.379715	0.88557		5	0.411557	0.193303
1	0.44425	0.20001		2	0.532509	0.13442		3	0.492224	0.725056		4	0.379789	0.910782		5	0.411939	0.588459
1	0.44454	0.308677		2	0.53285	0.931504		3	0.492518	0.177632		4	0.380524	0.496971		5	0.41196	0.353149
1	0.444601	0.00534867		2	0.533574	0.169031		3	0.493156	0.392896		4	0.380585	1.81599		5	0.411985	0.659612
1	0.444632	0.39443		2	0.533609	0.313454		3	0.493786	0.231544		4	0.381921	1.14371		5	0.412472	0.226514
1	0.444646	0.156983		2	0.534613	0.99041		3	0.49423	0.109106		4	0.382044	0.0939717		5	0.412765	0.0621836
1	0.44496	0.179982		2	0.534924	0.69949		3	0.496051	0.127781		4	0.382278	0.50834		5	0.413276	1.11312
1	0.445079	0.20001		2	0.535211	0.830561		3	0.496608	0.0878538		4	0.382303	0.242973		5	0.413366	0.817944
1	0.445233	0.164683		2	0.536819	1.08255		3	0.497111	0.165675		4	0.382329	0.242973		5	0.414047	0.243477
1	0.445336	0.0811234		2	0.536956	0.338196		3	0.497205	0.929768		4	0.382738	0.414884		5	0.41427	0.0964855
1	0.44537	0.0811234		2	0.536991	1.53045		3	0.500023	0.557652		4	0.382837	0.0781735		5	0.41457	0.886916
1	0.445505	0.143653		2	0.537088	0.111136		3	0.500609	0.164115		4	0.382995	0.0117128		5	0.415508	0.248649
1	0.445576	0.39443		2	0.537286	0.322463		3	0.500792	0.0715123		4	0.383308	0.493969		5	0.415589	0.0436377
1	0.445797	0.165829		2	0.537344	0.558813		3	0.501071	0.0711309		4	0.383383	0.556613		5	0.416192	0.271273
1	0.446022	0.0542428		2	0.537639	1.8608		3	0.501129	0.0242609		4	0.383752	0.302868		5	0.416209	0.47852
1	0.446183	0.110728		2	0.538419	1.39392		3	0.501457	0.277424		4	0.383825	0.101114		5	0.417259	1.29179
1	0.446628	0.715458		2	0.538494	0.0429605		3	0.502195	0.134934		4	0.383873	0.537917		5	0.417917	1.20588
1	0.446756	0.00633098		2	0.538952	0.0820589		3	0.503285	0.0771066		4	0.384119	0.430634		5	0.41803	0.36833
1	0.447293	0.288348		2	0.539492	0.00927268		3	0.505336	0.333893		4	0.384221	0.544844		5	0.418242	0.263177
1	0.44951	0.254656		2	0.539607	0.725519		3	0.505887	0.0240601		4	0.384798	0.50834		5	0.418487	0.760963
1	0.44956	0.215555		2	0.540024	0.159557		3	0.507878	0.313094		4	0.384888	0.00986211		5	0.419106	1.77616
1	0.449689	0.0864111		2	0.540423	0.666954		3	0.507958	0.146902		4	0.385408	1.25724		5	0.419226	0.39493
1	0.451464	0.254656		2	0.54048	0.28752		3	0.507976	0.0051962		4	0.385576	0.0396901		5	0.419349	0.142649
1	0.452718	0.230808		2	0.541575	0.108832		3	0.508323	0.0175898		4	0.385966	1.14815		5	0.419486	1.65353
1	0.45312	0.519938		2	0.542252	0.0972863		3	0.508411	0.265464		4	0.386137	0.0508342		5	0.41957	0.894003
1	0.453993	0.559705		2	0.544553	0.0109441		3	0.510706	0.864835		4	0.386154	0.00283251		5	0.419644	0.171125
1	0.454505	0.935282		2	0.54479	0.285953		3	0.510919	0.0352706		4	0.386519	0.456103		5	0.419861	1.3756
1	0.454535	0.27616		2	0.544804	0.0872188		3	0.512283	0.189545		4	0.386865	0.462553		5	0.420124	0.0326606
1	0.454792	0.0360043		2	0.546614	0.0376189		3	0.513202	0.163064		4	0.387727	0.115767		5	0.420312	0.51904
1	0.454953	0.263662		2	0.546811	0.0134564		3	0.51328	0.165239		4	0.38808	0.50834		5	0.420491	1.62855
1	0.455765	0.663742		2	0.546886	0.134347		3	0.513607	0.812909		4	0.388583	0.303699		5	0.420587	0.403903
1	0.455996	0.215568		2	0.548434	0.261205		3	0.513814	0.29323		4	0.390249	1.23716		5	0.420756	1.8541
1	0.456097	0.269913		2	0.550102	0.0652794		3	0.514438	0.0172137		4	0.390813	0.54527		5	0.420877	0.140818
1	0.457036	0.193254		2	0.550427	0.189217		3	0.514843	0.512084		4	0.390891	0.162269		5	0.42094	0.51904
1	0.457096	0.193254		2	0.550805	0.20179		3	0.514993	0.353134		4	0.392764	0.0408025		5	0.421008	0.0959041
1	0.457129	0.151601		2	0.551422	0.792797		3	0.515485	0.512084		4	0.394792	1.44302		5	0.421235	0.464765
1	0.457815	0.0557643		2	0.55159	0.927284		3	0.516633	0.128432		4	0.395671	0.119429		5	0.421399	1.3756
1	0.458348	0.496036		2	0.551853	0.0923454		3	0.518278	0.0331268		4	0.395972	0.175287		5	0.421451	1.03872
1	0.459037	0.508507		2	0.554271	0.340758		3	0.518704	0.792997		4	0.397044	0.161646		5	0.421596	1.2057
1	0.459541	0.117286		2	0.555342	0.101376		3	0.519461	0.427489		4	0.397314	0.124525		5	0.422397	0.0544949
1	0.45988	0.193254		2	0.556552	0.0430173		3	0.519817	0.13971		4	0.397364	0.249734		5	0.422543	0.0773968
1	0.460157	0.175102		2	0.557057	0.132581		3	0.520484	0.221252		4	0.398078	0.300117		5	0.42277	1.05589
1	0.463226	0.203378		2	0.557321	0.00238154		3	0.520566	0.29374		4	0.398683	0.00691683		5	0.422845	0.401884
1	0.465096	1.19342		2	0.558801	0.249759		3	0.520898	0.29374		4	0.398736	0.259888		5	0.424134	0.895745
1	0.465237	0.298167		2	0.560247	0.182371		3	0.521584	0.610757		4	0.398976	0.132552		5	0.424237	0.604664
1	0.466372	0.0159458		2	0.56286	0.0445763		3	0.521791	0.0551463		4	0.399084	0.0211452		5	0.424504	0.76477
1	0.4672	0.567293		2	0.562982	0.00635367		3	0.522223	0.562269		4	0.399787	0.219893		5	0.424651	0.767848
1	0.467322	0.489564		2	0.564532	0.0743216		3	0.522376	0.272509		4	0.400127	0.0211452		5	0.424724	1.04614
1	0.467517	0.443608		2	0.565609	0.0370821		3	0.522823	0.70239		4	0.40049	0.465593		5	0.425152	0.251564
1	0.469995	0.135757		2	0.576241	0.83574		3	0.52321	0.424366		4	0.400694	0.1529		5	0.425302	0.357018
1	0.470665	0.175296		2	0.57636	0.378758		3	0.524961	0.272451		4	0.402766	0.0233375		5	0.425682	0.319199
1	0.470901	0.886118		2	0.576774	0.876725		3	0.525602	0.362497		4	0.402934	0.219719		5	0.425943	0.890843
1	0.470978	0.18521		2	0.583	0.711152		3	0.526761	0.272509		4	0.403181	0.0457097		5	0.42618	0.0321939
1	0.471611	0.0233398		2	0.584277	1.22802		3	0.526861	0.276764		4	0.403557	0.235573		5	0.426852	0.278207
1	0.472391	0.752573		2	0.585981	0.578878		3	0.526918	0.14113		4	0.403634	0.0739457		5	0.426876	0.56517
1	0.472498	0.896426		2	0.587035	0.143647		3	0.527122	0.272509		4	0.403647	0.362808		5	0.427083	0.257291
1	0.472732	0.659055		2	0.587106	0.739801		3	0.527299	0.222985		4	0.403662	0.144712		5	0.427383	0.339981
1	0.473601	0.359636		2	0.588976	0.0811196		3	0.527641	0.272509		4	0.403773	0.377976		5	0.427564	0.357654
1	0.473632	0.729972		2	0.589519	0.150221		3	0.527938	0.301704		4	0.404516	0.161536		5	0.427937	0.365229
1	0.473759	0.218273		2	0.590001	0.0315929		3	0.52823	0.0670113		4	0.406338	0.149652		5	0.428276	0.16723
1	0.474387	0.559437		2	0.590647	0.328606		3	0.528425	0.255073		4	0.406845	0.00273859		5	0.428622	0.241686
1	0.474406	0.367985		2	0.590758	0.379837		3	0.528443	0.2106		4	0.407208	0.666884		5	0.428775	0.344551
1	0.476225	0.33894		2	0.59115	0.0408479		3	0.530226	0.288315		4	0.4076	0.712315		5	0.42896	1.21226
1	0.476254	0.0952447		2	0.591276	0.0579345		3	0.530445	0.0375692		4	0.407693	0.109932		5	0.429149	0.35509
1	0.476544	0.0839197		2	0.591364	7.31952e-05		3	0.530475	0.105094		4	0.407887	0.144456		5	0.429305	0.344551
1	0.477037	2.1186		2	0.591688	1.38978		3	0.530667	0.0916008		4	0.408155	0.0996365		5	0.429597	1.26855
1	0.477287	0.282936		2	0.593619	0.439202		3	0.530722	0.0162183		4	0.408246	0.356721		5	0.429704	0.157351
1	0.477309	0.0964711		2	0.593872	0.678157		3	0.531461	0.222985		4	0.408695	0.11837		5	0.430105	0.048361
1	0.477628	0.642577		2	0.593947	0.284251		3	0.531504	0.0670113		4	0.408861	0.631307		5	0.431551	0.434914
1	0.477663	0.317587		2	0.594265	0.522006		3	0.531564	0.222841		4	0.409174	0.093613		5	0.431813	0.361456
1	0.477876	0.727429		2	0.594756	0.0927941		3	0.531837	0.23151		4	0.409606	0.0373905		5	0.432283	0.869548
1	0.478552	0.998475		2	0.594934	0.107337		3	0.531989	0.222841		4	0.409692	0.192023		5	0.4323	0.204333
1	0.478577	1.01456		2	0.595014	0.068729		3	0.532198	0.498167		4	0.409773	0.268954		5	0.432625	0.0223759
1	0.479147	0.770602		2	0.595241	0.272894		3	0.534201	0.521347		4	0.409827	0.0659996		5	0.432812	0.109389
1	0.479508	0.84754		2	0.595684	0.134605		3	0.534353	0.266345		4	0.410007	0.00516298		5	0.433007	1.41878
1	0.480303	1.18731		2	0.595951	0.515889		3	0.534446	0.406759		4	0.410793	0.629529		5	0.43309	0.118529
1	0.48054	0.247266		2	0.596584	0.284846		3	0.534689	0.272509		4	0.410853	0.765281		5	0.433297	0.294478
1	0.480884	0.183058		2	0.598325	0.869965		3	0.53498	0.381448		4	0.412126	0.340983		5	0.433936	0.263721
1	0.481814	0.60647		2	0.598612	0.636778		3	0.53506	0.192039		4	0.412959	0.0631446		5	0.433959	0.0587392
1	0.482966	0.46323		2	0.599053	0.59178		3	0.535126	0.0370718		4	0.413115	0.132171		5	0.434284	0.589619
1	0.483006	1.48555		2	0.599439	0.152949		3	0.535777	0.463762		4	0.413229	0.106787		5	0.435233	0.904095
1	0.483463	1.44466		2	0.599858	0.0119715		3	0.535897	0.262183		4	0.414581	0.231462		5	0.435329	1.30079
1	0.485242	0.474069		2	0.601451	1.07435		3	0.536171	0.0281832		4	0.414948	0.14643		5	0.43546	0.831927
1	0.48644	0.0355581		2	0.602693	0.0477324		3	0.536199	0.110273		4	0.415861	0.226867		5	0.435574	0.833653
1	0.487641	0.35595		2	0.602986	0.163269		3	0.536375	0.555059		4	0.418168	0.194187		5	0.435622	0.571154
1	0.488426	0.2478		2	0.60339	0.203562		3	0.537221	0.274591		4	0.418235	0.520664		5	0.436286	0.434658
1	0.489664	0.344361		2	0.603702	0.63444		3	0.537424	0.321601		4	0.418468	0.258897		5	0.436501	0.363878
1	0.489844	0.191567		2	0.603735	0.757289		3	0.539248	0.826058		4	0.418629	0.44728		5	0.437071	1.15125
1	0.491042	0.0980178		2	0.604084	0.0294675		3	0.540349	0.00288748		4	0.41869	0.373161		5	0.437452	0.220853
1	0.491701	0.24675		2	0.604156	0.21311		3	0.540545	0.638797		4	0.418879	0.44906		5	0.438088	0.332317
1	0.492528	0.262481		2	0.60445	0.0879308		3	0.540881	0.727471		4	0.418982	0.0152999		5	0.438268	0.088432
1	0.494725	0.625573		2	0.605813	0.245709		3	0.540968	0.535157		4	0.419048	0.079788		5	0.438282	0.0392709
1	0.495164	0.594505		2	0.606847	0.131272		3	0.542078	0.0398093		4	0.419382	0.0916219		5	0.439126	0.00812713
1	0.495372	0.367091		2	0.606963	1.07163		3	0.542291	0.0303745		4	0.420435	1.06749		5	0.439326	0.881782
1	0.495626	1.76538		2	0.607681	0.0868054		3	0.542383	0.281679		4	0.421221	0.0714406		5	0.439369	0.882299
1	0.495988	0.389877		2	0.607825	0.224645		3	0.543239	1.10211		4	0.421436	0.130235		5	0.439746	0.696402
1	0.49673	0.680945		2	0.607841	1.64351		3	0.543286	0.350608		4	0.421592	0.396006		5	0.44137	1.16354
1	0.496957	0.999714		2	0.607949	0.28297		3	0.543398	0.0422362		4	0.421695	0.152359		5	0.441413	0.812529
1	0.497166	0.803229		2	0.60808	0.179459		3	0.543671	0.356471		4	0.421847	0.0654343		5	0.442756	0.134664
1	0.497991	0.0822071		2	0.609147	0.318644		3	0.544122	0.433462		4	0.422607	0.0521074		5	0.443124	0.265042
1	0.498836	0.109794		2	0.61029	0.0442082		3	0.544135	0.581359		4	0.422657	0.430306		5	0.443171	0.589919
1	0.501627	0.0812888		2	0.610629	0.292742		3	0.544156	0.433462		4	0.422793	0.614393		5	0.443891	1.66132
1	0.502669	0.0430501		2	0.610767	0.124584		3	0.544283	0.685335		4	0.422837	0.119342		5	0.444094	1.93899
1	0.503836	0.196709		2	0.610787	0.173827		3	0.544383	0.590142		4	0.423249	0.61645		5	0.444282	0.326316
1	0.50393	0.181958		2	0.6109	0.253654		3	0.54459	1.00515		4	0.423599	0.443565		5	0.445545	0.811024
1	0.505029	0.0478113		2	0.610934	0.0230067		3	0.544702	0.961806		4	0.423678	0.0267327		5	0.445653	0.671649
1	0.505239	1.06312		2	0.6111	0.134959		3	0.545327	0.140254		4	0.423902	0.137099		5	0.445845	0.729129
1	0.505948	0.0564568		2	0.611134	0.99012		3	0.545617	0.669192		4	0.424108	0.0478657		5	0.446493	1.11103
1	0.506716	0.444809		2	0.611199	0.0583897		3	0.547794	0.411725		4	0.424192	0.63737		5	0.447524	0.195114
1	0.506757	0.920362		2	0.611536	0.138202		3	0.550257	0.870186		4	0.42447	0.212773		5	0.448298	0.837174
1	0.507419	0.293988		2	0.611638	0.120396		3	0.550402	0.717664		4	0.424505	0.176574		5	0.448718	0.11867
1	0.507706	0.474365		2	0.612312	0.713161		3	0.550512	0.100755		4	0.424565	0.151706		5	0.449259	0.741972
1	0.514658	0.404404		2	0.612483	0.588894		3	0.554007	0.0433762		4	0.425001	0.588308		5	0.449634	0.779379
1	0.514679	0.220856		2	0.612984	0.165903		3	0.55469	0.615554		4	0.425071	0.0922901		5	0.449953	0.878716
1	0.514894	0.863577		2	0.613173	0.713167		3	0.557495	0.13209		4	0.425202	0.0579198		5	0.450521	0.522398
1	0.515126	0.997702		2	0.613526	0.00934999		3	0.558712	0.0339728		4	0.425572	0.235599		5	0.45076	0.501835
1	0.516438	0.24824		2	0.61403	0.288918		3	0.558979	0.240484		4	0.425768	0.103085		5	0.451869	1.12621
1	0.516613	0.11572		2	0.614155	0.0654295		3	0.561095	0.252158		4	0.426783	0.0814489		5	0.452534	0.980778
1	0.516944	0.322743		2	0.614196	0.0448574		3	0.562966	0.379356		4	0.427152	0.536356		5	0.45342	0.647095
1	0.517553	0.809705		2	0.614438	0.0859097		3	0.564205	0.322853		4	0.427343	0.173142		5	0.453436	0.0366525
1	0.518652	0.116728		2	0.614584	0.301277		3	0.5685	0.250111		4	0.427435	0.664591		5	0.45539	0.956725
1	0.518782	0.012453		2	0.614604	0.267735		3	0.568999	0.566371		4	0.427783	0.00958528		5	0.455531	0.796797
1	0.519069	0.121027		2	0.615802	1.22023		3	0.56985	0.603681		4	0.427862	0.059863		5	0.455728	0.362018
1	0.519222	0.128718		2	0.616101	0.0939481		3	0.570582	0.506352		4	0.427909	0.670186		5	0.456278	0.0798023
1	0.519387	0.0475142		2	0.616461	0.534284		3	0.571169	0.512378		4	0.428138	0.530649		5	0.456838	0.0798023
1	0.519456	0.0392075		2	0.617019	0.0226529		3	0.572303	0.0469946		4	0.428535	0.237271		5	0.457324	0.0798023
1	0.519471	0.000784844		2	0.617073	0.19779		3	0.572337	0.820888		4	0.428659	0.115577		5	0.457513	0.274079
1	0.519537	0.104884		2	0.617591	0.334356		3	0.57454	0.26011		4	0.428864	0.249166		5	0.457767	0.135956
1	0.519672	0.134698		2	0.618301	0.270306		3	0.575429	0.604262		4	0.429123	0.500424		5	0.458097	0.182072
1	0.520098	0.0388613		2	0.618344	0.0531094		3	0.575496	0.370913		4	0.429577	0.0926321		5	0.458229	0.375371
1	0.520313	0.077346		2	0.61868	0.327845		3	0.575561	0.307632		4	0.429928	0.00904306		5	0.458553	0.0798023
1	0.520997	0.259732		2	0.619244	1.1625		3	0.575634	0.130747		4	0.43006	0.284858		5	0.458871	0.0798023
1	0.521183	0.628046		2	0.619754	0.254524		3	0.575905	0.258157		4	0.430938	0.349046		5	0.458957	0.0539634
1	0.52148	0.537705		2	0.62011	0.0710107		3	0.575954	0.164947		4	0.431032	0.142788		5	0.459095	1.38629
1	0.521985	0.506515		2	0.62055	0.220557		3	0.575998	0.4357		4	0.43132	0.65718		5	0.459286	1.4191
1	0.522045	0.142247		2	0.620768	0.494291		3	0.576155	0.105694		4	0.431648	0.800297		5	0.459332	1.08904
1	0.522223	0.711694		2	0.621016	0.491172		3	0.576307	0.0701294		4	0.431761	0.253568		5	0.459473	0.701747
1	0.5226	0.539112		2	0.621375	0.279138		3	0.576501	1.07906		4	0.431952	0.182972		5	0.459608	0.0958612
1	0.52587	0.716415		2	0.621608	0.165845		3	0.577095	0.255922		4	0.432414	0.0527178		5	0.45983	0.616393
1	0.525927	0.338908		2	0.621979	0.473619		3	0.577277	0.696073		4	0.432508	0.485569		5	0.459946	1.33971
1	0.52637	0.484189		2	0.622759	0.374888		3	0.577409	0.459509		4	0.432628	0.283863		5	0.460602	0.0798023
1	0.527208	0.148575		2	0.622913	0.025493		3	0.577944	0.0407395		4	0.432814	0.338283		5	0.460899	0.00492856
1	0.527584	1.1735		2	0.623723	0.497231		3	0.578189	0.470668		4	0.432854	0.296537		5	0.461555	0.269265
1	0.528019	1.22234		2	0.62374	0.472713		3	0.578529	0.38168		4	0.432886	0.596434		5	0.463623	0.401667
1	0.528433	0.400857		2	0.623851	0.282792		3	0.578703	0.0913644		4	0.433101	0.318362		5	0.464004	0.58474
1	0.528715	0.922485		2	0.623918	0.462927		3	0.578747	0.0802038		4	0.433299	0.596385		5	0.464294	0.446629
1	0.529253	0.561452		2	0.626534	0.671592		3	0.578925	0.763516		4	0.433383	0.45217		5	0.464805	0.125564
1	0.529635	0.39322		2	0.62704	0.323282		3	0.579015	0.048646		4	0.434581	1.60928		5	0.464859	0.751096
1	0.529667	0.0612399		2	0.627339	0.322929		3	0.579278	0.114051		4	0.434638	0.270219		5	0.465086	0.255495
1	0.529908	0.476245		2	0.62739	0.352051		3	0.579578	1.11574		4	0.434764	0.220896		5	0.465136	2.32341
1	0.530008	0.392157		2	0.627716	0.319646		3	0.580279	0.00769665		4	0.435189	0.0521266		5	0.465267	0.192726
1	0.530445	0.585598		2	0.628192	0.236023		3	0.580296	0.688886		4	0.435658	0.411248		5	0.465495	1.80839
1	0.530553	0.597107		2	0.628267	0.158037		3	0.58047	0.289252		4	0.435763	0.115378		5	0.465599	1.79418
1	0.530821	0.993011		2	0.628544	0.687495		3	0.580644	0.503383		4	0.435871	1.35558		5	0.466351	0.185376
1	0.53091	0.479957		2	0.628722	0.517389		3	0.581231	0.540969		4	0.436435	0.694902		5	0.466703	0.0939119
1	0.531014	0.620845		2	0.629751	0.00197196		3	0.581407	0.0407395		4	0.436639	1.39772		5	0.466917	0.272551
1	0.531179	0.33643		2	0.629775	0.177442		3	0.58177	0.53478		4	0.437299	0.872099		5	0.467056	0.981135
1	0.531247	0.556244		2	0.629975	0.104013		3	0.582913	0.117876		4	0.438059	0.169458		5	0.467236	1.41393
1	0.531523	0.0137249		2	0.63013	0.110623		3	0.583056	0.0179921		4	0.438852	0.354041		5	0.46732	1.18146
1	0.531716	0.314901		2	0.630631	0.376803		3	0.584805	0.858282		4	0.439151	0.175706		5	0.467835	0.356818
1	0.531836	0.146699		2	0.630765	0.332076		3	0.585104	0.000821158		4	0.439478	0.090173		5	0.468173	1.06055
1	0.531856	0.534422		2	0.631483	0.234312		3	0.58538	0.636843		4	0.439592	0.0626301		5	0.468235	0.953081
1	0.532048	0.972294		2	0.631649	0.45697		3	0.586011	0.648875		4	0.441007	0.140423		5	0.468465	1.21739
1	0.532225	0.00365728		2	0.63182	0.634023		3	0.586414	0.116996		4	0.441289	0.105014		5	0.468662	1.19891
1	0.532428	0.332795		2	0.632413	0.159444		3	0.586857	0.671061		4	0.445744	0.433829		5	0.468692	1.07041
1	0.532586	0.332795		2	0.633141	0.0785549		3	0.586872	0.151744		4	0.446201	0.258178		5	0.468899	1.06034
1	0.533517	0.566804		2	0.63508	0.619432		3	0.586927	0.275462		4	0.446404	0.640196		5	0.469326	0.0537852
1	0.534195	0.0834409		2	0.635532	0.651572		3	0.587769	0.895228		4	0.447679	0.0548917		5	0.469428	0.845573
1	0.534357	0.548251		2	0.636355	0.126591		3	0.587808	0.331769		4	0.447782	0.293796		5	0.469615	0.484606
1	0.534432	0.202598		2	0.636391	0.751834		3	0.587949	0.540969		4	0.447962	0.00226343		5	0.46975	1.04957
1	0.534798	0.726023		2	0.636533	0.0266428		3	0.58857	1.14268		4	0.448083	0.0467809		5	0.469911	1.45664
1	0.534863	0.726023		2	0.638122	0.100634		3	0.589226	0.47689		4	0.448236	0.104463		5	0.469969	0.0246315
1	0.53546	0.726023		2	0.638153	0.0251938		3	0.590179	0.0506968		4	0.448375	0.314262		5	0.470016	1.81998
1	0.536564	0.88539		2	0.638168	0.15341		3	0.593792	0.990098		4	0.448429	0.226648		5	0.470368	2.037
1	0.538503	0.174529		2	0.639059	0.228532		3	0.594663	0.631328		4	0.448573	0.00226343		5	0.470723	1.82289
1	0.539103	0.18548		2	0.639159	0.807189		3	0.594908	0.274181		4	0.448799	1.68739		5	0.47152	2.03635
1	0.539464	0.537295		2	0.63919	0.319036		3	0.59524	0.601659		4	0.449005	0.0816618		5	0.472153	1.5387
1	0.539658	0.146496		2	0.639313	0.0478586		3	0.595489	1.34369		4	0.449062	0.0842538		5	0.472521	0.722165
1	0.539733	0.210361		2	0.641418	1.01337		3	0.595688	0.534798		4	0.449366	0.00226343		5	0.472992	0.6662
1	0.540058	0.0702662		2	0.641432	0.332138		3	0.597702	1.29685		4	0.44945	0.00226343		5	0.473889	0.781164
1	0.541751	0.171504		2	0.641756	0.0338514		3	0.597978	0.0519319		4	0.449736	0.253957		5	0.473919	0.0418563
1	0.543148	0.0342272		2	0.644035	0.955463		3	0.597998	0.517073		4	0.449776	0.281938		5	0.474119	0.0479894
1	0.544068	0.177124		2	0.646714	0.922991		3	0.598437	1.44618		4	0.449968	0.189157		5	0.474174	0.691604
1	0.544813	0.867796		2	0.6471	0.0941721		3	0.598476	1.34836		4	0.450116	0.00226343		5	0.474366	0.431511
1	0.545171	0.0439126		2	0.647402	0.85092		3	0.599317	0.598527		4	0.450508	0.102241		5	0.474549	0.395148
1	0.54577	0.244408		2	0.647914	0.139733		3	0.599814	0.134521		4	0.450937	0.208374		5	0.474569	0.148398
1	0.545856	0.589816		2	0.648058	0.20873		3	0.600405	0.652161		4	0.451199	0.243274		5	0.474732	0.117306
1	0.547263	0.228151		2	0.648261	0.0455407		3	0.600771	0.101854		4	0.45154	0.00226343		5	0.47501	0.452511
1	0.548319	0.137539		2	0.649432	0.155545		3	0.600952	1.56859		4	0.452129	0.0518164		5	0.475048	0.276309
1	0.548483	0.0561342		2	0.649508	0.095015		3	0.601398	1.56859		4	0.452919	1.5053		5	0.475275	0.598551
1	0.548499	0.0312773		2	0.650088	0.706722		3	0.60142	0.0796284		4	0.453759	0.377963		5	0.475883	2.02477
1	0.548999	0.185181		2	0.650282	0.0168059		3	0.601504	0.701969		4	0.454191	0.403908		5	0.476146	1.45664
1	0.551983	0.227596		2	0.650522	0.249492		3	0.602069	0.0179658		4	0.454422	0.374773		5	0.476338	0.421881
1	0.552777	0.0387596		2	0.651428	0.0439625		3	0.602174	0.627269		4	0.454542	0.358801		5	0.476539	0.173963
1	0.552796	0.0764837		2	0.652829	0.0766177		3	0.602492	0.0492743		4	0.454954	0.245694		5	0.476689	0.433719
1	0.552933	0.245712		2	0.652941	0.338363		3	0.602816	1.20181		4	0.455185	0.470903		5	0.476988	0.589711
1	0.552985	0.0402182		2	0.653472	0.554137		3	0.603468	1.43318		4	0.455851	0.648388		5	0.477332	0.274523
1	0.553285	0.265165		2	0.653558	0.650679		3	0.603833	0.231884		4	0.455897	0.120426		5	0.477485	1.73647
1	0.553789	0.0871809		2	0.653723	0.667012		3	0.604345	0.704376		4	0.45634	0.133644		5	0.477734	0.598551
1	0.553991	0.295755		2	0.653886	0.780511		3	0.604844	1.49695		4	0.456705	0.177606		5	0.478026	0.552215
1	0.554693	0.0648991		2	0.65398	0.796702		3	0.604947	1.27046		4	0.456804	0.095974		5	0.478437	0.0816739
1	0.555109	0.499286		2	0.654014	0.335236		3	0.604986	2.0583		4	0.457381	0.0388035		5	0.478521	1.50689
1	0.555609	0.0298155		2	0.654165	0.627257		3	0.605004	1.47487		4	0.457768	0.00421464		5	0.47864	0.0303985
1	0.557507	0.0482406		2	0.654357	0.335236		3	0.605366	0.248676		4	0.458226	0.516562		5	0.479035	0.103441
1	0.557564	0.0621643		2	0.654512	0.103394		3	0.60601	1.46484		4	0.458585	0.172603		5	0.479368	0.421881
1	0.557774	0.295551		2	0.655376	0.213292		3	0.606162	1.60969		4	0.458748	0.314262		5	0.479499	0.973817
1	0.55822	0.626129		2	0.661524	0.0434926		3	0.606706	0.132753		4	0.458813	0.156011		5	0.479891	0.0370837
1	0.558379	0.163283		2	0.662021	0.392242		3	0.607305	0.306716		4	0.459346	0.270961		5	0.48041	1.24657
1	0.561585	0.261439		2	0.663274	0.329293		3	0.608136	0.141942		4	0.459979	1.10966		5	0.480498	1.73647
1	0.562011	0.0631092		2	0.663533	0.392242		3	0.608791	1.5888		4	0.460246	0.170553		5	0.480663	0.0246315
1	0.562625	0.377026		2	0.663669	0.0358987		3	0.610022	1.44273		4	0.460561	0.315312		5	0.480713	2.44531
1	0.562761	0.0724402		2	0.663827	0.45325		3	0.610781	0.786259		4	0.460764	0.324942		5	0.480871	0.0205504
1	0.562975	0.0317938		2	0.663935	0.0453665		3	0.612228	1.28006		4	0.46147	0.0296373		5	0.480965	1.52118
1	0.564476	0.078127		2	0.664158	0.392242		3	0.612944	0.838152		4	0.461919	1.24874		5	0.481221	0.711923
1	0.56508	0.21757		2	0.664468	0.502734		3	0.614252	0.709696		4	0.461978	0.59356		5	0.481325	2.29697
1	0.565302	0.00619843		2	0.664552	0.127462		3	0.614319	0.530263		4	0.462041	0.534699		5	0.482283	0.442734
1	0.566941	0.354589		2	0.664749	0.130438		3	0.61558	0.344754		4	0.462334	0.360327		5	0.482812	0.535413
1	0.567457	0.0691874		2	0.666618	0.536366		3	0.616394	0.159223		4	0.462373	0.577085		5	0.483024	0.755543
1	0.568429	0.0412208		2	0.666693	0.355829		3	0.616643	0.181629		4	0.462544	1.37028		5	0.483131	0.555717
1	0.568766	0.00238476		2	0.667035	0.120815		3	0.616726	0.882974		4	0.462788	0.226631		5	0.483304	0.530604
1	0.568924	0.247495		2	0.667204	0.373258		3	0.617025	0.857531		4	0.463127	0.0602852		5	0.483426	0.245054
1	0.569727	0.651384		2	0.667302	0.888444		3	0.617416	0.0725278		4	0.463444	0.955547		5	0.483614	0.0303918
1	0.569745	0.394173		2	0.667595	1.12312		3	0.617636	0.753087		4	0.463922	0.00972809		5	0.483659	0.124053
1	0.569781	0.92207		2	0.667743	0.716255		3	0.617786	0.790725		4	0.463941	0.584795		5	0.483866	0.0284748
1	0.570322	0.019105		2	0.667974	0.606283		3	0.618483	0.0311919		4	0.464926	0.0461796		5	0.483936	0.0815008
1	0.571205	0.060434		2	0.668933	0.137788		3	0.618564	0.066551		4	0.46541	1.23775		5	0.484087	0.0658521
1	0.572053	0.0217553		2	0.669447	0.458725		3	0.618673	0.311296		4	0.466307	0.146053		5	0.48416	0.176472
1	0.572161	0.298257		2	0.669864	0.381285		3	0.618928	0.0237224		4	0.466591	0.590826		5	0.484173	0.533646
1	0.572328	0.314238		2	0.669884	0.137658		3	0.619239	0.349918		4	0.466785	0.421607		5	0.484276	0.667979
1	0.572586	0.239525		2	0.670062	0.0486166		3	0.619813	0.110284		4	0.4668	0.497979		5	0.484476	0.0253803
1	0.572643	0.035071		2	0.670701	0.32635		3	0.622801	0.935545		4	0.466968	0.757916		5	0.484494	0.478813
1	0.572773	0.0881018		2	0.67136	0.0199088		3	0.623227	0.721453		4	0.4671	0.4547		5	0.484535	1.63338
1	0.573738	0.26622		2	0.673089	0.509184		3	0.623379	0.5494		4	0.467333	0.576025		5	0.485303	0.0221471
1	0.574162	0.16051		2	0.673439	0.121269		3	0.624115	0.207561		4	0.467605	0.0375982		5	0.486971	0.619078
1	0.575678	0.370512		2	0.674093	0.0080702		3	0.624407	0.195502		4	0.467731	0.812059		5	0.486993	0.179625
1	0.577323	1.38523		2	0.674833	0.334782		3	0.624823	0.226416		4	0.467752	1.00345		5	0.487022	0.136296
1	0.577493	0.101778		2	0.674935	0.176746		3	0.625004	0.628789		4	0.468029	0.0672673		5	0.487269	0.235998
1	0.577897	0.195476		2	0.676088	0.0790148		3	0.625084	0.677939		4	0.468096	0.336262		5	0.487711	1.19466
1	0.578991	0.372396		2	0.676368	0.477304		3	0.625403	0.782326		4	0.468387	0.17504		5	0.487845	0.500654
1	0.579884	0.617924		2	0.676912	0.355693		3	0.625548	0.0906628		4	0.469394	0.425727		5	0.487944	0.150987
1	0.580914	0.469533		2	0.676967	0.646923		3	0.626386	0.445548		4	0.469931	0.351739		5	0.488304	0.746975
1	0.581414	0.317523		2	0.677199	0.105306		3	0.62664	0.242647		4	0.470102	1.79438		5	0.489302	0.222218
1	0.581476	0.175779		2	0.67731	0.310196		3	0.627129	0.0217022		4	0.470127	0.588025		5	0.489783	0.164635
1	0.581634	0.559524		2	0.677724	0.663825		3	0.627223	0.0672024		4	0.471561	0.0129659		5	0.490033	0.464095
1	0.581969	0.743919		2	0.677949	0.0150146		3	0.627387	0.659719		4	0.471593	0.860475		5	0.492252	0.478027
1	0.582136	0.723941		2	0.678444	0.193858		3	0.627405	0.41617		4	0.471761	0.837392		5	0.49245	1.04155
1	0.582166	0.387809		2	0.678546	0.256713		3	0.627973	0.302763		4	0.471887	0.692017		5	0.492517	0.130689
1	0.583573	0.0257183		2	0.678586	0.361884		3	0.628386	0.370688		4	0.471925	1.12179		5	0.492765	1.45664
1	0.584008	0.237694		2	0.678663	0.366058		3	0.628872	0.575074		4	0.472001	0.576294		5	0.492982	0.466539
1	0.584156	0.716733		2	0.679694	0.390204		3	0.629411	0.390993		4	0.472347	0.873846		5	0.493596	0.866124
1	0.584213	0.402616		2	0.680306	0.802418		3	0.629516	0.210728		4	0.472438	0.348678		5	0.493705	2.66509
1	0.585048	0.0551056		2	0.680456	1.31252		3	0.629653	0.170743		4	0.472652	0.440049		5	0.495375	0.0510418
1	0.585995	0.254908		2	0.682441	0.185635		3	0.629974	0.0298825		4	0.472726	0.0771033		5	0.495504	0.168674
1	0.586205	0.00499937		2	0.682528	0.297132		3	0.630182	0.44744		4	0.472808	0.408745		5	0.495773	0.833719
1	0.586899	0.737416		2	0.682839	0.0740727		3	0.63024	0.158479		4	0.473027	0.569655		5	0.495858	0.794529
1	0.586941	1.41453		2	0.684564	0.00506404		3	0.630279	0.125449		4	0.47314	0.129697		5	0.49663	2.06963
1	0.587094	0.838307		2	0.68734	0.0561546		3	0.630835	0.444434		4	0.473165	0.0619662		5	0.496826	2.27152
1	0.587232	1.30541		2	0.687448	0.0292693		3	0.631818	0.767563		4	0.473894	0.265075		5	0.497003	0.0691746
1	0.588464	0.0220495		2	0.687472	0.0970051		3	0.631914	0.0323882		4	0.474314	0.47606		5	0.497158	1.41838
1	0.589142	0.245764		2	0.68765	0.420426		3	0.631967	0.0991979		4	0.474554	0.0658156		5	0.497782	0.151763
1	0.589688	0.517537		2	0.688012	0.414825		3	0.632774	0.798099		4	0.475368	0.177383		5	0.497835	0.197514
1	0.590536	0.694277		2	0.689023	0.26211		3	0.633031	0.287316		4	0.475381	0.389022		5	0.498025	0.626549
1	0.590666	0.408398		2	0.689055	0.300472		3	0.633213	0.290435		4	0.475593	0.0305758		5	0.49816	0.0396911
1	0.590903	1.54979		2	0.68939	0.782627		3	0.633428	0.480331		4	0.475865	0.292011		5	0.498286	0.422931
1	0.591584	0.0932821		2	0.689644	0.0841416		3	0.63365	0.0969398		4	0.47667	0.0122873		5	0.498431	0.795558
1	0.592597	0.338574		2	0.69	0.0922885		3	0.633891	0.509029		4	0.478305	0.0815155		5	0.498504	0.11686
1	0.592867	0.0998077		2	0.690552	0.210948		3	0.634945	0.0139945		4	0.479017	0.265518		5	0.498667	0.0337283
1	0.592984	0.151862		2	0.691407	0.000380251		3	0.635464	0.199231		4	0.479524	0.0756107		5	0.498723	0.206357
1	0.593706	0.158175		2	0.691443	0.489942		3	0.635527	0.183414		4	0.479773	0.0375114		5	0.498856	0.646228
1	0.593807	0.0980825		2	0.691574	0.125803		3	0.636126	0.600745		4	0.480577	0.417897		5	0.498908	0.878087
1	0.593981	0.434321		2	0.691894	0.0663346		3	0.637761	0.832179		4	0.481062	0.685676		5	0.499727	0.132504
1	0.594036	0.112222		2	0.692018	0.0144456		3	0.637959	0.389638		4	0.48133	0.348294		5	0.500633	0.492022
1	0.594051	0.125327		2	0.692458	0.0125428		3	0.637981	1.68314		4	0.48141	0.343336		5	0.500981	0.0010341
1	0.594166	0.167473		2	0.692523	0.418657		3	0.638203	0.350951		4	0.48147	0.0152616		5	0.501029	0.314074
1	0.594258	0.0530975		2	0.692635	0.000793367		3	0.63849	0.727404		4	0.481891	0.310289		5	0.50195	1.55526
1	0.594446	0.18335		2	0.692943	0.971277		3	0.63861	1.46025		4	0.482152	0.375589		5	0.50318	1.16958
1	0.594718	0.12436		2	0.692974	0.0247587		3	0.638729	0.0333191		4	0.482375	0.250337		5	0.50348	0.1805
1	0.596257	0.213191		2	0.693793	0.0472066		3	0.639377	1.34417		4	0.482806	0.589887		5	0.503789	0.316213
1	0.596314	0.213906		2	0.694128	0.182194		3	0.640007	0.489099		4	0.482965	0.167348		5	0.503802	0.4615
1	0.596487	0.0110099		2	0.69417	0.0103429		3	0.64025	0.275018		4	0.483177	0.259661		5	0.504163	0.168155
1	0.597037	0.215988		2	0.694188	0.0287279		3	0.64116	0.390691		4	0.483469	0.199016		5	0.504284	0.865338
1	0.597076	0.300896		2	0.694481	0.533614		3	0.641311	0.0389235		4	0.483618	0.0605072		5	0.504298	1.03072
1	0.597319	0.174462		2	0.694658	0.0406806		3	0.641601	0.791544		4	0.483881	0.401638		5	0.504538	0.385865
1	0.597595	0.0621147		2	0.694996	0.0926838		3	0.642033	0.492424		4	0.483905	0.536446		5	0.504713	0.381138
1	0.597988	0.453119		2	0.695038	0.0185127		3	0.642336	0.133766		4	0.484029	0.300043		5	0.504803	0.316957
1	0.598774	0.293077		2	0.695408	0.0311611		3	0.642494	0.0466406		4	0.484088	0.134032		5	0.504974	0.0700746
1	0.59942	0.249387		2	0.695589	0.33664		3	0.64314	0.108554		4	0.484155	0.0513199		5	0.505118	0.200945
1	0.599461	0.11991		2	0.695605	0.0484418		3	0.643167	0.348315		4	0.484531	0.102818		5	0.505285	0.312923
1	0.59965	0.0528832		2	0.69574	0.0337697		3	0.643581	0.540394		4	0.484688	0.000178676		5	0.505414	0.0355521
1	0.59973	0.227243		2	0.695986	0.121808		3	0.643941	0.225756		4	0.485095	0.105598		5	0.50552	0.0355521
1	0.600201	0.248776		2	0.696106	0.0412955		3	0.644024	0.428004		4	0.485432	0.115683		5	0.505679	0.182801
1	0.600306	0.123835		2	0.696229	0.0198991		3	0.644312	0.717448		4	0.485454	0.160876		5	0.505783	0.300504
1	0.600902	0.058271		2	0.696445	0.0926838		3	0.644824	0.274346		4	0.485526	0.000273499		5	0.505966	0.182801
1	0.602162	0.366273		2	0.696644	0.0382852		3	0.64572	0.238377		4	0.485726	0.0341172		5	0.506149	0.434192
1	0.603851	0.0308087		2	0.696774	0.329546		3	0.646306	0.0558329		4	0.486029	0.148504		5	0.50629	0.0620223
1	0.60388	0.0620471		2	0.696835	0.0366153		3	0.646986	0.124922		4	0.486077	0.451281		5	0.506348	0.0511886
1	0.603998	0.122186		2	0.697002	0.0151496		3	0.647273	0.856483		4	0.486261	0.185887		5	0.506667	0.295471
1	0.604028	0.0520821		2	0.697048	0.418892		3	0.647377	0.311383		4	0.486296	0.241765		5	0.506801	1.14158
1	0.604589	1.23219		2	0.697269	0.239467		3	0.647528	0.845022		4	0.487054	0.354026		5	0.506908	0.299905
1	0.604664	0.171414		2	0.697287	0.0727004		3	0.647798	0.185202		4	0.487122	1.13976		5	0.507253	0.0611284
1	0.604849	0.861075		2	0.697632	0.0437443		3	0.648005	0.257194		4	0.48719	0.539933		5	0.507271	0.0192125
1	0.605032	0.992182		2	0.697734	0.672059		3	0.648658	0.216957		4	0.487855	0.150001		5	0.507295	0.0771051
1	0.605176	0.311189		2	0.697946	0.0419286		3	0.648672	0.558772		4	0.487874	0.0186777		5	0.507318	0.0192125
1	0.605713	0.818714		2	0.698303	0.686139		3	0.648939	0.106406		4	0.487992	0.177012		5	0.507724	0.122466
1	0.606019	0.371357		2	0.698384	0.675472		3	0.650213	0.204239		4	0.488007	0.223705		5	0.508063	0.0573299
1	0.606161	0.0368955		2	0.698719	0.357971		3	0.650806	0.566802		4	0.489453	0.0501845		5	0.50809	0.0720754
1	0.606267	1.00026		2	0.69899	0.115767		3	0.651406	0.311625		4	0.489556	0.357996		5	0.508388	0.13054
1	0.606437	0.394958		2	0.699588	0.0911806		3	0.652245	0.417871		4	0.4909	0.031651		5	0.509089	0.00152436
1	0.606579	0.618845		2	0.699631	0.0535161		3	0.652715	0.889401		4	0.491514	0.453403		5	0.509169	0.333866
1	0.606634	0.320562		2	0.700017	0.681148		3	0.652802	0.0343803		4	0.491644	0.324457		5	0.509342	0.243868
1	0.606705	0.0414169		2	0.700081	0.255114		3	0.653071	0.78034		4	0.493	0.122386		5	0.509491	0.985953
1	0.606764	0.138001		2	0.700291	0.297895		3	0.653141	1.0383		4	0.493164	0.0849232		5	0.509605	0.317639
1	0.607355	0.44952		2	0.701292	0.0915753		3	0.653629	0.676687		4	0.493752	0.448833		5	0.509652	0.201937
1	0.607398	0.280846		2	0.701604	0.112958		3	0.653643	1.20254		4	0.493905	0.606868		5	0.509686	0.619115
1	0.607559	0.469653		2	0.701742	0.455779		3	0.653745	0.427232		4	0.494569	0.750584		5	0.509863	0.109294
1	0.607706	0.0687421		2	0.701978	0.0971907		3	0.653938	0.055135		4	0.494599	0.749228		5	0.509956	0.00913467
1	0.607865	0.102173		2	0.702808	0.290585		3	0.653979	0.33764		4	0.494793	0.111516		5	0.510002	0.0661509
1	0.608068	0.0141719		2	0.703606	1.15396		3	0.654125	0.010349		4	0.4949	0.074804		5	0.510103	0.000709487
1	0.608512	0.189197		2	0.70362	0.742373		3	0.654952	0.138073		4	0.494929	0.68075		5	0.510379	0.0226644
1	0.608689	0.477928		2	0.703751	0.286604		3	0.655178	1.15112		4	0.495101	0.136065		5	0.510855	0.00407396
1	0.608889	0.0758101		2	0.703769	0.796783		3	0.655249	0.35845		4	0.495168	0.0865103		5	0.511064	0.343791
1	0.609094	0.16325		2	0.704907	0.014831		3	0.65542	0.174957		4	0.495336	0.338339		5	0.511108	0.186128
1	0.609311	0.10171		2	0.705248	0.377683		3	0.656586	0.159275		4	0.495467	0.00769536		5	0.512041	0.410704
1	0.609446	0.00658564		2	0.705335	1.74872		3	0.658316	0.00321416		4	0.495696	0.004909		5	0.512092	0.00852063
1	0.610223	0.667027		2	0.706071	0.473094		3	0.659135	0.123339		4	0.495738	0.00511952		5	0.513635	0.0346172
1	0.611089	0.020306		2	0.706238	1.42965		3	0.661197	0.112167		4	0.49591	0.584277		5	0.513896	0.114235
1	0.612952	0.397672		2	0.706301	0.0669046		3	0.661211	0.439619		4	0.495965	0.199186		5	0.5145	0.0620385
1	0.613195	0.147967		2	0.70637	0.317614		3	0.661243	0.257188		4	0.496021	0.231512		5	0.514642	0.240256
1	0.614273	0.363299		2	0.706599	0.225981		3	0.661329	1.03466		4	0.496245	0.183806		5	0.515435	0.735431
1	0.614977	0.323848		2	0.706784	0.307476		3	0.661416	0.253748		4	0.496301	0.328012		5	0.515729	0.272752
1	0.615209	0.0526264		2	0.70726	0.307277		3	0.662779	0.090281		4	0.497107	0.0499024		5	0.51581	0.0311444
1	0.616458	0.172904		2	0.707433	0.0248365		3	0.662934	0.713793		4	0.497146	0.0940071		5	0.517199	1.59165
1	0.616831	0.493578		2	0.710264	0.140919		3	0.665257	0.342555		4	0.499798	0.162113		5	0.517339	0.0743163
1	0.617071	1.05663		2	0.712036	0.0108333		3	0.666604	0.324304		4	0.499966	0.483485		5	0.517482	0.176184
1	0.617402	0.572998		2	0.712303	0.2044		3	0.666932	0.151404		4	0.50009	0.79027		5	0.517723	0.382743
1	0.617873	0.226942		2	0.712762	0.731261		3	0.667641	0.609525		4	0.500354	0.162413		5	0.517912	0.166723
1	0.619	0.00294384		2	0.713911	0.376193		3	0.667656	0.638417		4	0.500367	0.207927		5	0.518405	0.267029
1	0.621036	0.862525		2	0.714518	0.085254		3	0.667789	0.39486		4	0.500419	0.567125		5	0.518638	0.23818
1	0.621591	0.575572		2	0.714632	1.58048		3	0.667835	0.799818		4	0.50084	0.129822		5	0.518758	0.110607
1	0.622561	0.11039		2	0.717184	1.45264		3	0.669072	0.891405		4	0.501267	1.41954		5	0.51888	0.255739
1	0.624529	1.0753		2	0.717721	0.0286852		3	0.669265	0.0732312		4	0.501287	1.35865		5	0.51898	0.121678
1	0.624775	0.430176		2	0.717747	0.157916		3	0.670083	0.24844		4	0.501362	0.845471		5	0.519125	0.16031
1	0.625204	0.772529		2	0.717939	0.165141		3	0.670407	0.161445		4	0.503615	0.0500117		5	0.5198	0.173041
1	0.625432	0.968311		2	0.718344	0.211025		3	0.670442	0.339008		4	0.503906	0.0450237		5	0.521612	1.18841
1	0.625489	0.412212		2	0.71861	0.102431		3	0.67067	0.0329886		4	0.504461	0.012477		5	0.521719	0.0794257
1	0.626351	0.299769		2	0.718653	0.166331		3	0.670905	0.0221422		4	0.504637	0.866185		5	0.523587	0.377522
1	0.626542	0.891471		2	0.719046	0.268752		3	0.671952	0.321644		4	0.505201	0.179474		5	0.524346	0.183395
1	0.626569	0.0270401		2	0.720176	0.387993		3	0.672145	0.155122		4	0.5056	0.00884191		5	0.524997	0.0498397
1	0.627062	0.375404		2	0.721718	0.592531		3	0.673174	0.0842916		4	0.505633	0.0898696		5	0.526802	0.0362851
1	0.627925	0.444728		2	0.723495	1.03612		3	0.673338	0.0187854		4	0.506178	0.218761		5	0.527088	0.620607
1	0.62863	0.611682		2	0.72392	0.324061		3	0.67468	0.0426078		4	0.50669	0.339965		5	0.527214	0.387192
1	0.628685	0.0649489		2	0.7334	1.44549		3	0.67496	0.0538364		4	0.506904	0.156943		5	0.527729	0.376929
1	0.628866	0.143344		2	0.734176	0.470685		3	0.675584	0.598107		4	0.507338	0.00465011		5	0.527954	0.205108
1	0.628954	0.0677598		2	0.735663	0.671411		3	0.676295	0.653634		4	0.507455	0.219189		5	0.527981	0.131954
1	0.630209	0.238744		2	0.736019	0.210943		3	0.676949	0.228686		4	0.508661	0.23518		5	0.528107	0.349119
1	0.631754	0.425177		2	0.73828	0.562059		3	0.678464	0.471228		4	0.508895	0.143698		5	0.528212	0.508262
1	0.631901	0.0173319		2	0.739059	1.37398		3	0.679078	0.00398409		4	0.509198	0.23518		5	0.528676	0.345471
1	0.632372	0.11885		2	0.739345	0.0113379		3	0.679261	0.421406		4	0.510489	0.0731638		5	0.528728	0.0435715
1	0.632602	0.171412		2	0.740396	0.290337		3	0.68048	0.465653		4	0.511561	0.122209		5	0.528921	0.762981
1	0.632799	0.0584987		2	0.740611	0.28017		3	0.680891	0.457293		4	0.511752	0.409233		5	0.52936	0.376929
1	0.632964	0.0143549		2	0.740672	0.281797		3	0.681583	0.535581		4	0.511952	0.0315749		5	0.529481	0.179947
1	0.634228	0.179222		2	0.74105	0.790887		3	0.681681	0.00956108		4	0.511997	0.575374		5	0.529582	0.0901272
1	0.634963	0.0380213		2	0.741507	0.0162494		3	0.682059	0.0514177		4	0.512095	0.0225089		5	0.529615	0.0109964
1	0.63567	0.239019		2	0.742297	0.178951		3	0.682219	0.566617		4	0.512312	0.104528		5	0.530138	0.243666
1	0.635902	1.33011		2	0.742313	0.0364303		3	0.682363	0.133006		4	0.51238	0.077921		5	0.530559	0.104119
1	0.636788	0.700985		2	0.742805	0.0138683		3	0.684473	0.485143		4	0.512652	0.322231		5	0.530766	0.0820253
1	0.638653	0.144368		2	0.742931	0.399363		3	0.685197	0.599158		4	0.513156	0.187772		5	0.531201	0.101171
1	0.642762	0.374465		2	0.743472	0.293161		3	0.685515	0.307386		4	0.513361	0.190438		5	0.53149	0.0392682
1	0.643447	0.365444		2	0.743612	0.468408		3	0.687458	0.0740615		4	0.513426	0.359147		5	0.531812	0.291117
1	0.643836	0.114303		2	0.745766	0.190128		3	0.687864	0.171054		4	0.513647	0.617634		5	0.531847	0.0342996
1	0.644148	0.5771		2	0.745839	0.378604		3	0.688026	0.252169		4	0.514183	0.0739492		5	0.532088	0.633637
1	0.644814	0.222718		2	0.746198	0.621566		3	0.690184	0.223224		4	0.5145	0.597725		5	0.532299	0.800957
1	0.644974	0.116702		2	0.746704	1.47245		3	0.690661	0.127566		4	0.514629	0.675371		5	0.532368	0.022733
1	0.645661	0.060969		2	0.746921	0.212763		3	0.690916	0.237294		4	0.51513	0.211968		5	0.532453	0.286854
1	0.646492	0.0556634		2	0.746938	0.417127		3	0.691072	0.219145		4	0.515262	0.0622196		5	0.532615	0.598456
1	0.646531	0.0669926		2	0.747291	0.0656245		3	0.691466	0.219145		4	0.515322	0.19771		5	0.532732	1.5376
1	0.646558	0.180853		2	0.747647	0.197978		3	0.693163	0.539455		4	0.516301	0.956682		5	0.532936	0.379671
1	0.648156	0.318236		2	0.748186	0.320356		3	0.693211	1.28083		4	0.516419	0.392918		5	0.533173	0.0160376
1	0.648705	0.0908091		2	0.748443	0.144848		3	0.693806	0.285759		4	0.516662	0.477191		5	0.533766	0.4878
1	0.648863	0.0117938		2	0.748531	0.195981		3	0.694236	0.198989		4	0.516758	0.364756		5	0.5338	0.472665
1	0.64916	0.168366		2	0.748759	0.811638		3	0.69434	0.241184		4	0.517314	0.590324		5	0.534055	0.0273377
1	0.650324	0.859923		2	0.748819	0.219267		3	0.694515	0.29898		4	0.517376	0.62016		5	0.534195	0.287867
1	0.652281	0.159158		2	0.748894	0.155376		3	0.694622	0.207743		4	0.517605	0.729731		5	0.534529	0.109608
1	0.652305	0.144774		2	0.749042	0.309155		3	0.694913	0.253715		4	0.518797	0.161618		5	0.534654	0.538452
1	0.652684	0.506433		2	0.749069	0.398294		3	0.695191	0.330047		4	0.519513	0.0970504		5	0.534672	0.207996
1	0.654412	1.34533		2	0.749181	0.659001		3	0.695351	0.219145		4	0.519701	0.812153		5	0.534849	0.109608
1	0.654548	0.989122		2	0.749742	0.208625		3	0.695525	0.404589		4	0.519877	0.956682		5	0.53505	0.284689
1	0.65577	0.0200189		2	0.749817	0.284758		3	0.695825	0.0240389		4	0.519931	0.650675		5	0.535791	0.302502
1	0.656193	0.213081		2	0.750213	0.974258		3	0.696069	0.344597		4	0.520016	0.653938		5	0.537259	0.305218
1	0.657898	0.595917		2	0.750533	0.615568		3	0.696231	0.33445		4	0.520394	0.601509		5	0.537479	1.07547
1	0.658051	0.144212		2	0.750726	0.510485		3	0.696344	0.262504		4	0.520675	0.286852		5	0.538808	0.357007
1	0.658067	0.26056		2	0.750768	0.411112		3	0.69658	0.494523		4	0.520764	0.841493		5	0.539169	0.305218
1	0.658413	0.24256		2	0.750874	0.0276411		3	0.696693	0.101203		4	0.521895	0.485818		5	0.54153	0.65742
1	0.660534	0.179559		2	0.750957	0.348476		3	0.697194	0.239983		4	0.522448	0.462484		5	0.541754	1.43425
1	0.660755	0.0227857		2	0.751034	0.0316366		3	0.697395	0.176796		4	0.52253	1.00761		5	0.541846	0.271803
1	0.662928	0.260671		2	0.751077	0.00121755		3	0.697491	0.0755282		4	0.522847	0.73464		5	0.54293	0.289494
1	0.663182	0.0498651		2	0.751187	1.02201		3	0.69767	0.111914		4	0.522944	0.0669828		5	0.543031	0.0272564
1	0.663474	0.878823		2	0.751275	0.110332		3	0.69772	0.207814		4	0.523094	1.06749		5	0.543559	0.0948853
1	0.663522	0.401805		2	0.751431	0.232174		3	0.697768	0.49034		4	0.523142	0.574245		5	0.543595	0.070717
1	0.663822	0.0710796		2	0.751448	0.413163		3	0.698041	0.452312		4	0.523172	0.52722		5	0.545637	2.29001
1	0.663874	0.141324		2	0.751638	0.267539		3	0.698142	0.193497		4	0.523917	1.33803		5	0.545789	1.55465
1	0.664107	0.151856		2	0.751782	0.37122		3	0.698553	0.272346		4	0.524446	0.311359		5	0.546556	0.285541
1	0.665064	0.0965481		2	0.753064	0.956995		3	0.698693	0.20612		4	0.524539	0.753092		5	0.546791	0.366119
1	0.666092	0.668954		2	0.753533	0.947796		3	0.698757	0.198989		4	0.524974	0.278842		5	0.547181	0.956504
1	0.666158	0.23769		2	0.753772	0.671438		3	0.698846	0.344597		4	0.525044	0.708395		5	0.54772	0.533598
1	0.666602	0.384406		2	0.754939	0.174459		3	0.699167	0.072356		4	0.525465	0.839881		5	0.548338	0.138642
1	0.669462	0.0960243		2	0.755404	0.823699		3	0.699489	0.198989		4	0.52583	0.763336		5	0.548671	0.0451306
1	0.670382	0.211655		2	0.755663	0.0817093		3	0.699944	0.449566		4	0.526503	0.069571		5	0.549187	0.452494
1	0.670446	0.455347		2	0.75644	0.063582		3	0.701449	0.123452		4	0.527682	0.286307		5	0.549206	0.0916362
1	0.671911	0.284348		2	0.756496	0.303218		3	0.701578	0.15714		4	0.528023	1.23423		5	0.549256	0.123757
1	0.672454	0.238542		2	0.75672	0.439791		3	0.701763	0.236038		4	0.5282	0.543603		5	0.549277	0.0422164
1	0.673785	0.10631		2	0.757077	0.543531		3	0.702156	0.0748635		4	0.529188	0.481303		5	0.549556	0.248671
1	0.674586	0.074043		2	0.757282	0.0913094		3	0.702212	0.0887549		4	0.529409	0.350424		5	0.549673	0.452822
1	0.67482	0.087833		2	0.757335	0.825998		3	0.702777	0.00909933		4	0.529541	0.157237		5	0.550534	0.371851
1	0.675578	0.296457		2	0.757385	0.35486		3	0.702977	0.0748635		4	0.52961	0.645571		5	0.552269	0.107609
1	0.676195	0.521051		2	0.758252	0.357235		3	0.703015	0.0338301		4	0.53036	0.126115		5	0.552738	0.127135
1	0.677095	0.0798782		2	0.75835	0.23835		3	0.703407	0.166667		4	0.532031	0.00380313		5	0.55302	0.0628804
1	0.67797	0.123553		2	0.758678	0.624243		3	0.70355	0.176446		4	0.533471	0.363107		5	0.553239	0.491925
1	0.678264	0.17473		2	0.758808	0.0727828		3	0.703656	0.245458		4	0.533537	0.18797		5	0.553654	0.381457
1	0.678747	1.42174		2	0.758925	0.65199		3	0.7037	0.112057		4	0.534777	1.01632		5	0.553922	0.0083154
1	0.678934	0.376848		2	0.759009	0.875445		3	0.703922	0.34836		4	0.535096	0.976123		5	0.554041	0.356851
1	0.679076	0.344495		2	0.759135	1.29351		3	0.704244	0.169465		4	0.535945	0.152439		5	0.554239	0.9139
1	0.680574	0.420136		2	0.759615	0.507399		3	0.705467	0.0904639		4	0.536099	0.198387		5	0.554623	0.0520594
1	0.680825	0.247592		2	0.759761	0.120657		3	0.706567	0.245458		4	0.536352	0.381594		5	0.554827	0.0627051
1	0.681286	0.348838		2	0.759807	1.33848		3	0.706613	0.0548666		4	0.536493	0.151274		5	0.555655	0.137515
1	0.681554	0.103208		2	0.760275	0.292788		3	0.70816	0.352484		4	0.536894	0.520449		5	0.555916	0.797763
1	0.681653	0.0211297		2	0.760329	0.295304		3	0.709208	0.123222		4	0.536934	0.160457		5	0.557337	0.575773
1	0.68171	0.181369		2	0.760419	0.221184		3	0.709627	0.32072		4	0.537216	0.116047		5	0.558427	0.162709
1	0.683022	0.445518		2	0.760546	0.170666		3	0.7115	0.00503206		4	0.537684	0.462644		5	0.558846	0.280205
1	0.683186	0.0368703		2	0.760724	0.091606		3	0.711663	0.410548		4	0.537982	0.281446		5	0.559063	0.172245
1	0.68354	0.0116232		2	0.760737	0.0329385		3	0.712037	0.076814		4	0.538771	0.547335		5	0.560613	0.00690515
1	0.683922	0.425954		2	0.761157	0.107355		3	0.712089	0.263981		4	0.539007	0.547335		5	0.560771	1.07721
1	0.684357	0.187986		2	0.761251	0.0256294		3	0.713449	0.0464167		4	0.539399	0.601961		5	0.562191	0.356017
1	0.684772	0.187986		2	0.762031	0.013254		3	0.713616	0.0236242		4	0.539424	0.299007		5	0.562458	0.905505
1	0.684939	0.719294		2	0.762206	0.346983		3	0.715088	0.302319		4	0.539492	0.513933		5	0.562778	0.960117
1	0.685381	0.375939		2	0.763333	0.267504		3	0.715455	0.103808		4	0.539576	0.184666		5	0.563077	0.308227
1	0.685486	0.0933531		2	0.763539	0.405788		3	0.718048	0.0733565		4	0.540071	0.261363		5	0.564068	0.178161
1	0.685533	0.659259		2	0.763738	0.0512302		3	0.719877	0.0511291		4	0.540138	0.322405		5	0.564221	0.0328183
1	0.685874	0.393739		2	0.763861	0.18272		3	0.720299	0.0275073		4	0.540337	0.228962		5	0.565135	0.367885
1	0.687977	0.660731		2	0.764116	0.0962981		3	0.721539	0.0607517		4	0.540489	0.786941		5	0.565295	0.311819
1	0.689553	0.32733		2	0.764528	0.0885108		3	0.722634	0.282596		4	0.54058	0.829687		5	0.565461	0.0725962
1	0.690277	0.30883		2	0.764755	0.252375		3	0.722845	0.750875		4	0.540595	0.547335		5	0.56576	0.331393
1	0.690361	0.00769334		2	0.765406	0.514128		3	0.723096	0.109929		4	0.540876	0.525015		5	0.565808	0.184263
1	0.691127	0.130029		2	0.76564	0.153326		3	0.724075	0.190213		4	0.540895	0.547335		5	0.565851	0.348276
1	0.691401	0.451827		2	0.765794	0.684603		3	0.724665	0.149486		4	0.541516	0.422184		5	0.565938	0.483527
1	0.691775	0.520605		2	0.765939	0.357385		3	0.724779	0.156866		4	0.541559	0.547335		5	0.566116	0.634048
1	0.691899	0.337585		2	0.766035	0.153326		3	0.725085	0.298066		4	0.541835	0.0395884		5	0.568599	0.0642735
1	0.696278	0.118487		2	0.766214	0.0614967		3	0.725925	0.156866		4	0.54307	1.04664		5	0.568638	1.07214
1	0.696296	0.157574		2	0.766455	0.00518701		3	0.725948	0.299395		4	0.543129	0.410498		5	0.568984	0.54126
1	0.697378	0.0860603		2	0.76669	0.0488225		3	0.726015	0.314938		4	0.543516	0.359947		5	0.569758	0.449356
1	0.698953	0.238552		2	0.767258	0.186687		3	0.727513	0.0661199		4	0.54357	0.395692		5	0.570956	0.00639949
1	0.701107	0.11854		2	0.767337	0.0667705		3	0.727828	1.06678		4	0.54483	0.19574		5	0.571781	0.304761
1	0.701961	0.193256		2	0.768401	0.0104784		3	0.72816	0.318468		4	0.545539	0.106495		5	0.575269	0.532726
1	0.703755	0.677543		2	0.768534	0.335837		3	0.728501	0.0607517		4	0.545587	0.244251		5	0.575347	0.673804
1	0.704109	0.137528		2	0.768748	0.562961		3	0.729427	0.609739		4	0.545814	0.00963203		5	0.575802	0.0468495
1	0.704212	0.220438		2	0.769074	0.396365		3	0.7297	0.522471		4	0.546135	0.348956		5	0.577064	0.234814
1	0.706549	0.0514683		2	0.770121	0.625765		3	0.730797	0.580116		4	0.547371	0.183639		5	0.577712	0.157025
1	0.70692	0.0784884		2	0.770302	0.307573		3	0.731645	0.387635		4	0.547532	0.0346372		5	0.578067	0.158534
1	0.707771	0.169244		2	0.770953	0.380774		3	0.73175	0.0237878		4	0.547612	0.086376		5	0.578396	0.0581474
1	0.708523	0.524408		2	0.771039	0.12625		3	0.733764	0.351537		4	0.548031	0.241655		5	0.578677	0.0491473
1	0.709358	0.0560362		2	0.771086	0.245901		3	0.733804	0.399767		4	0.548226	0.03816		5	0.578706	0.485408
1	0.709643	0.116382		2	0.771355	0.663852		3	0.734301	0.222442		4	0.548267	0.03816		5	0.578748	0.0206496
1	0.710166	0.126228		2	0.771368	0.326125		3	0.734955	0.0149427		4	0.548338	0.0283404		5	0.578958	0.318932
1	0.710467	1.45936		2	0.771564	0.297636		3	0.734999	0.165069		4	0.548708	0.173091		5	0.579322	0.508044
1	0.710497	0.114944		2	0.771751	0.117905		3	0.735306	0.248712		4	0.549021	0.0783427		5	0.579373	0.100395
1	0.711699	0.149738		2	0.771907	0.0644658		3	0.735514	0.121686		4	0.549178	0.209781		5	0.579853	0.269243
1	0.711812	0.0226909		2	0.772044	1.19087		3	0.736259	0.346874		4	0.549347	0.207989		5	0.579878	0.204081
1	0.712096	0.447293		2	0.772254	0.0605057		3	0.736949	0.415808		4	0.5496	0.0471675		5	0.580313	0.633861
1	0.712618	0.435762		2	0.772314	0.0644658		3	0.737683	0.756622		4	0.549685	0.6688		5	0.580604	0.188244
1	0.713682	0.672811		2	0.772515	0.21293		3	0.737907	0.416145		4	0.549721	0.701633		5	0.581672	0.172616
1	0.714063	0.130848		2	0.772622	0.124533		3	0.737925	1.33242		4	0.550033	1.41102		5	0.581963	0.300146
1	0.716805	0.027255		2	0.772831	0.288142		3	0.738357	0.125387		4	0.550219	0.1412		5	0.582369	0.178992
1	0.719774	0.0891025		2	0.772894	0.0654466		3	0.740183	0.147444		4	0.550288	0.192262		5	0.584263	0.407476
1	0.723966	0.413095		2	0.773221	0.0568932		3	0.740319	0.138888		4	0.550326	0.333336		5	0.584318	0.854939
1	0.724674	0.521549		2	0.773314	1.01205		3	0.741935	0.503185		4	0.550988	0.376499		5	0.584808	1.43278
1	0.724844	0.0910128		2	0.773398	0.514419		3	0.742052	0.0916119		4	0.55168	0.122294		5	0.585477	1.32168
1	0.725962	0.30682		2	0.774383	1.01085		3	0.742219	0.0649506		4	0.551762	0.889125		5	0.585612	1.19215
1	0.7268	0.0760296		2	0.7744	0.254283		3	0.74237	0.754607		4	0.551904	0.116512		5	0.585656	1.1517
1	0.727782	0.185924		2	0.774616	0.0955165		3	0.742716	0.0548718		4	0.552827	0.356295		5	0.585859	1.43278
1	0.728191	0.0592092		2	0.775574	0.0764177		3	0.743578	0.319137		4	0.552999	1.08844		5	0.586012	0.834366
1	0.728544	0.193958		2	0.775632	0.115413		3	0.745123	0.00193809		4	0.553313	0.592124		5	0.586127	0.380255
1	0.728748	0.00214905		2	0.776191	0.128077		3	0.745212	0.168158		4	0.553808	0.165937		5	0.586891	0.159782
1	0.728973	0.0706035		2	0.77634	1.0765		3	0.746036	0.862921		4	0.553865	0.0793873		5	0.587504	1.89738
1	0.72954	0.0896581		2	0.77639	0.0900636		3	0.74652	0.295254		4	0.553888	0.980863		5	0.587572	0.750961
1	0.730306	0.183916		2	0.776407	0.376708		3	0.747086	0.30097		4	0.5548	0.13206		5	0.588079	0.90965
1	0.730485	0.235577		2	0.776647	0.517085		3	0.747413	0.170388		4	0.555176	0.427223		5	0.588269	0.591441
1	0.730948	0.24885		2	0.776695	0.167227		3	0.748182	0.230678		4	0.555518	0.123422		5	0.588619	0.454011
1	0.731044	0.0896581		2	0.77674	0.146511		3	0.748285	0.102439		4	0.555605	0.410175		5	0.588764	0.297836
1	0.731608	0.135652		2	0.776882	0.219399		3	0.748327	0.119385		4	0.556381	0.393695		5	0.589108	0.476518
1	0.731917	0.248389		2	0.777098	0.0906152		3	0.748374	0.119385		4	0.557398	0.143959		5	0.589865	0.39967
1	0.732819	0.100146		2	0.77728	0.935116		3	0.748483	0.0706334		4	0.557558	0.0157146		5	0.590224	0.404181
1	0.732956	0.748106		2	0.777841	0.0380987		3	0.749306	0.29834		4	0.557651	0.279088		5	0.5904	0.176728
1	0.733046	0.0354868		2	0.777923	0.205789		3	0.749697	0.262125		4	0.557709	0.0832849		5	0.59106	0.481112
1	0.733728	0.0418801		2	0.777989	0.828208		3	0.749959	0.0108645		4	0.557854	0.0908716		5	0.591204	0.523867
1	0.734158	0.370262		2	0.778085	0.385135		3	0.751375	0.198548		4	0.558109	0.0019079		5	0.591453	0.573725
1	0.736996	0.00364794		2	0.778593	0.732436		3	0.752315	0.383347		4	0.558192	0.190863		5	0.591736	0.546616
1	0.737717	0.50831		2	0.778616	0.504996		3	0.752444	0.29733		4	0.560336	0.519436		5	0.592755	0.162107
1	0.738108	0.37654		2	0.779431	0.0275369		3	0.752804	0.440544		4	0.560492	0.353527		5	0.592896	0.0380214
1	0.738557	0.0391415		2	0.779736	0.0111665		3	0.752888	0.968804		4	0.560621	0.282134		5	0.592943	0.177333
1	0.740949	0.234029		2	0.779781	0.274		3	0.753147	0.250399		4	0.560893	0.281731		5	0.593036	0.150013
1	0.7418	0.15486		2	0.780064	0.0186615		3	0.753573	0.248933		4	0.561479	0.0297537		5	0.59337	0.113164
1	0.742852	0.248904		2	0.780571	0.154315		3	0.753767	0.204429		4	0.561537	0.279176		5	0.593413	0.0991032
1	0.743178	0.19235		2	0.781056	0.0775337		3	0.754227	0.299717		4	0.561634	0.0294969		5	0.593493	0.348364
1	0.744403	0.130072		2	0.78147	0.0780736		3	0.755285	0.353282		4	0.562727	0.464573		5	0.593594	0.293379
1	0.746377	0.284873		2	0.781952	0.00101438		3	0.755369	0.256513		4	0.564501	0.682719		5	0.595478	0.127964
1	0.748146	1.1958		2	0.782051	0.30752		3	0.755436	0.267834		4	0.564692	0.342657		5	0.59581	0.239356
1	0.748253	0.0973252		2	0.783837	0.525291		3	0.755876	0.728316		4	0.564815	0.109772		5	0.596297	0.00116018
1	0.748326	0.357005		2	0.784426	0.0623506		3	0.756391	0.0847876		4	0.564994	0.221354		5	0.596769	0.821131
1	0.748554	0.392235		2	0.784454	0.0812054		3	0.756411	0.933384		4	0.565339	0.301934		5	0.596795	0.0147485
1	0.748635	0.134115		2	0.784502	0.184255		3	0.757077	0.117399		4	0.56538	1.11487		5	0.596913	0.0629922
1	0.748721	0.0631893		2	0.784561	0.0757047		3	0.757361	0.287131		4	0.565561	1.49957		5	0.597477	0.354576
1	0.748949	0.295191		2	0.784663	0.252688		3	0.757429	0.323778		4	0.565903	0.194811		5	0.59881	0.355204
1	0.750424	0.32558		2	0.786243	0.454977		3	0.7576	0.201988		4	0.565988	0.273878		5	0.59897	1.13823
1	0.750926	0.381056		2	0.786973	0.820076		3	0.7578	0.123391		4	0.566657	0.203355		5	0.599048	0.338181
1	0.752603	0.167678		2	0.78908	0.0805585		3	0.758371	0.350787		4	0.566888	0.270262		5	0.599913	0.307773
1	0.755399	0.329683		2	0.789171	0.0264943		3	0.758656	0.00898364		4	0.567248	0.19369		5	0.600856	0.0615124
1	0.755432	0.282098		2	0.789314	0.12178		3	0.758913	0.463277		4	0.56776	0.382715		5	0.601837	0.737116
1	0.75779	0.435831		2	0.789466	0.297152		3	0.759521	0.129418		4	0.568179	0.363347		5	0.602004	0.259513
1	0.758192	0.173475		2	0.789572	0.205719		3	0.760468	0.0146722		4	0.568415	0.202799		5	0.603558	0.598707
1	0.758494	0.119102		2	0.789763	0.027365		3	0.760919	0.458938		4	0.568472	0.891442		5	0.604556	0.044327
1	0.760567	0.143133		2	0.789999	0.0678108		3	0.760971	0.705792		4	0.568625	0.134081		5	0.604751	0.473481
1	0.760741	0.437393		2	0.790413	0.366771		3	0.761049	0.494641		4	0.569175	0.909874		5	0.605531	0.689477
1	0.761394	0.0522826		2	0.790429	0.0355125		3	0.76392	0.156956		4	0.569393	0.0104506		5	0.60573	0.190859
1	0.761468	0.4307		2	0.790937	0.209288		3	0.765162	0.0934442		4	0.56943	0.27975		5	0.606517	0.0953003
1	0.762201	0.33187		2	0.790966	0.305878		3	0.765593	0.528267		4	0.569503	0.232306		5	0.607892	0.148274
1	0.76224	0.12094		2	0.791352	0.636341		3	0.765805	0.528267		4	0.570268	0.175572		5	0.608186	1.52878
1	0.762345	0.162891		2	0.792679	0.76122		3	0.765985	0.49604		4	0.571238	0.780659		5	0.608301	0.826605
1	0.762698	0.613503		2	0.79299	0.0281785		3	0.766976	0.797772		4	0.57142	0.0598482		5	0.608495	0.395381
1	0.762875	0.509171		2	0.794422	1.64933		3	0.767063	0.258395		4	0.57185	0.514765		5	0.608801	0.782693
1	0.763691	0.103959		2	0.796289	1.47789		3	0.767132	0.646844		4	0.573263	0.514765		5	0.61016	0.188253
1	0.764702	0.116071		2	0.796436	1.05231		3	0.768716	0.0138906		4	0.573458	0.621179		5	0.610935	0.212098
1	0.765075	0.00992126		2	0.796472	0.658296		3	0.768996	0.517561		4	0.57353	0.536555		5	0.612226	0.0283557
1	0.765174	0.0122658		2	0.796936	1.3799		3	0.769394	0.325391		4	0.573575	0.212367		5	0.612527	0.6534
1	0.765612	0.101706		2	0.797082	1.36115		3	0.770232	0.46023		4	0.573765	0.405288		5	0.612723	0.754144
1	0.766776	0.449719		2	0.797185	0.809386		3	0.770477	0.414773		4	0.573816	0.262566		5	0.612832	0.143294
1	0.766916	0.00107206		2	0.797239	2.25811		3	0.770813	0.167687		4	0.573867	0.843201		5	0.61302	0.650563
1	0.767816	0.247913		2	0.797638	1.29369		3	0.77197	0.0197444		4	0.574066	0.405288		5	0.613248	0.491533
1	0.767908	0.339475		2	0.797696	0.830364		3	0.772106	0.325391		4	0.575535	1.6073		5	0.614462	0.00103169
1	0.767998	0.10396		2	0.797774	1.52063		3	0.772206	0.587668		4	0.576038	0.173354		5	0.614539	0.644088
1	0.768161	0.339024		2	0.797874	0.439531		3	0.773152	0.611125		4	0.57611	0.423834		5	0.614849	0.816968
1	0.768561	0.062565		2	0.79797	0.840848		3	0.773242	0.325391		4	0.576276	0.462573		5	0.614943	0.353514
1	0.768664	0.10396		2	0.798126	0.74912		3	0.773576	0.211313		4	0.576519	0.173354		5	0.615972	0.953007
1	0.769275	0.112191		2	0.798232	1.29932		3	0.773851	0.728494		4	0.576648	0.44001		5	0.616355	0.847421
1	0.769972	0.592711		2	0.79843	1.5269		3	0.773888	0.16371		4	0.576962	0.874726		5	0.616403	0.594571
1	0.770064	0.0185169		2	0.799072	1.04088		3	0.773992	0.325391		4	0.578775	0.344095		5	0.616423	1.17842
1	0.770082	0.0668053		2	0.799264	0.380041		3	0.7744	0.729502		4	0.578922	0.410811		5	0.616449	1.30297
1	0.770282	0.284765		2	0.799762	0.0947021		3	0.775107	0.513734		4	0.579323	0.335059		5	0.616525	1.42684
1	0.770963	0.90258		2	0.80091	1.85459		3	0.775687	0.537224		4	0.579649	0.428654		5	0.616775	1.81006
1	0.771817	0.873336		2	0.80133	0.249711		3	0.775844	0.0113448		4	0.58112	0.0312456		5	0.617162	1.38521
1	0.772013	0.663633		2	0.802266	0.282459		3	0.776103	0.455811		4	0.581824	0.638551		5	0.617683	0.070477
1	0.772303	1.04647		2	0.802886	0.933593		3	0.776443	0.275383		4	0.583099	0.260342		5	0.617836	1.57065
1	0.772458	0.475697		2	0.802983	0.212084		3	0.777076	0.431759		4	0.58315	1.25372		5	0.618799	0.834298
1	0.772724	0.645386		2	0.803458	0.00162481		3	0.777327	0.271758		4	0.583357	0.930021		5	0.619487	0.014247
1	0.774097	0.215921		2	0.80471	0.486125		3	0.777492	0.504638		4	0.583986	0.7684		5	0.619841	0.0884247
1	0.77507	0.376342		2	0.805025	0.215285		3	0.777596	0.46023		4	0.58437	0.10371		5	0.619875	1.32711
1	0.775518	0.125579		2	0.805157	0.329468		3	0.777874	0.46023		4	0.585971	0.186485		5	0.620297	0.430779
1	0.775649	0.0876007		2	0.805545	0.288013		3	0.779009	1.8385		4	0.586647	1.81704		5	0.620998	2.04558
1	0.775705	0.506725		2	0.805705	0.334562		3	0.779076	1.051		4	0.587578	0.424867		5	0.621222	1.19253
1	0.776241	0.0495592		2	0.806133	0.416716		3	0.779385	0.248217		4	0.587634	1.16041		5	0.6214	1.20503
1	0.777251	0.0469242		2	0.80779	0.19906		3	0.780106	1.75894		4	0.58781	2.53388		5	0.623481	0.107212
1	0.777713	0.240593		2	0.808689	0.429915		3	0.780188	1.03037		4	0.587948	0.633696		5	0.623747	0.43798
1	0.778724	0.00378503		2	0.808719	0.830308		3	0.781491	0.493141		4	0.588202	0.481362		5	0.624878	0.181687
1	0.779047	0.74059		2	0.809824	0.824389		3	0.782969	0.155541		4	0.588763	0.046265		5	0.625679	0.0123273
1	0.779397	0.130556		2	0.809879	0.329598		3	0.783261	0.219282		4	0.588815	0.130365		5	0.625829	0.511071
1	0.779812	0.0588876		2	0.811234	0.075485		3	0.783284	0.0773929		4	0.588861	0.534552		5	0.625952	0.581236
1	0.780337	0.132804		2	0.811382	0.171861		3	0.783524	0.298299		4	0.59194	0.198571		5	0.626389	0.282117
1	0.780505	0.453385		2	0.814411	1.3223		3	0.783936	0.523209		4	0.592049	0.00974615		5	0.626423	0.550806
1	0.783499	0.984063		2	0.814475	0.0112923		3	0.785599	0.034128		4	0.593621	0.410179		5	0.626619	0.110304
1	0.784254	0.438932		2	0.81897	0.0199607		3	0.785992	0.553809		4	0.594047	0.511184		5	0.626725	0.0629945
1	0.784382	0.722343		2	0.819125	0.523047		3	0.787795	0.381109		4	0.594421	0.253896		5	0.627019	0.508097
1	0.784491	1.11258		2	0.819255	0.168463		3	0.788492	0.0538312		4	0.594783	0.137841		5	0.627477	0.598558
1	0.785691	0.0326769		2	0.820567	0.128309		3	0.78957	0.419233		4	0.596591	0.164069		5	0.627877	0.0109833
1	0.785829	0.878565		2	0.820809	0.127702		3	0.790029	0.45469		4	0.59668	0.746979		5	0.627946	0.110304
1	0.786874	0.145367		2	0.820888	0.0764378		3	0.790483	0.3181		4	0.596703	0.730026		5	0.628107	0.731098
1	0.787215	0.00379465		2	0.82162	0.771612		3	0.790863	0.435952		4	0.597178	0.755348		5	0.628305	0.728532
1	0.787587	0.0372821		2	0.822007	0.168229		3	0.790907	0.200398		4	0.598264	0.292332		5	0.6285	0.0169083
1	0.787697	0.119488		2	0.822741	0.072483		3	0.791313	0.178807		4	0.600483	0.0790962		5	0.629086	0.444502
1	0.788873	0.0853361		2	0.823984	0.11474		3	0.791771	0.762636		4	0.600622	0.0594204		5	0.629681	0.210292
1	0.788988	0.125516		2	0.824861	0.943042		3	0.792579	0.382683		4	0.600951	0.118502		5	0.629736	0.296589
1	0.789353	0.125202		2	0.825072	0.130149		3	0.792631	0.0859918		4	0.60182	0.479933		5	0.6311	0.151592
1	0.790787	0.0204607		2	0.825192	0.652542		3	0.792649	0.00450004		4	0.602053	0.359183		5	0.631887	0.0137568
1	0.79094	0.306065		2	0.827593	0.322872		3	0.793053	0.000681809		4	0.602306	0.301427		5	0.63309	0.430671
1	0.791192	0.416077		2	0.827639	0.256438		3	0.793583	0.505115		4	0.602616	0.132481		5	0.633769	0.47231
1	0.791439	0.165899		2	0.828067	0.473714		3	0.794595	0.224271		4	0.602727	0.875572		5	0.633811	0.666351
1	0.793587	0.155282		2	0.82848	0.141861		3	0.795358	0.0144443		4	0.604136	0.0965935		5	0.63404	1.20223
1	0.793805	0.013491		2	0.828581	0.010324		3	0.795745	0.319533		4	0.605948	0.507396		5	0.634363	0.381589
1	0.794699	0.320596		2	0.828751	0.0609754		3	0.795884	0.00356995		4	0.606145	0.633692		5	0.634385	0.347765
1	0.796471	0.0881966		2	0.832104	0.0437667		3	0.796304	0.264213		4	0.606447	0.103444		5	0.634419	1.15481
1	0.797197	0.0799418		2	0.832533	0.196639		3	0.797088	0.425227		4	0.606634	0.0222954		5	0.634718	0.456961
1	0.797241	0.956094		2	0.834459	1.30217		3	0.797187	0.335895		4	0.607026	0.475642		5	0.635267	0.254575
1	0.798673	0.147605		2	0.835497	0.0498641		3	0.797558	0.0237875		4	0.607307	0.329821		5	0.635768	0.546723
1	0.798823	0.0705225		2	0.839699	0.0563594		3	0.799924	0.251473		4	0.60765	2.34527		5	0.636218	0.546723
1	0.802259	0.352608		2	0.840718	0.332584		3	0.800538	0.4638		4	0.608409	0.507396		5	0.636497	1.20812
1	0.802319	0.731183		2	0.841252	0.183274		3	0.800765	0.23431		4	0.608693	0.161737		5	0.636811	0.726394
1	0.802842	0.00842564		2	0.841285	0.0887309		3	0.801263	0.706295		4	0.609392	0.952572		5	0.636957	0.360292
1	0.803631	0.452511		2	0.841322	0.116396		3	0.80147	0.441603		4	0.609826	2.33449		5	0.638297	0.139507
1	0.803836	0.161005		2	0.841409	0.240893		3	0.80159	0.309086		4	0.61008	2.19454		5	0.639231	0.244561
1	0.80412	0.163683		2	0.842948	0.0927188		3	0.801723	0.424958		4	0.610304	0.174965		5	0.639628	0.018086
1	0.804969	0.57053		2	0.843664	1.25848		3	0.801853	0.424958		4	0.610388	2.19454		5	0.639668	0.0993228
1	0.806148	0.358879		2	0.843821	0.442328		3	0.802417	0.175301		4	0.610939	1.77582		5	0.640881	0.0497795
1	0.807194	0.747902		2	0.843883	0.201798		3	0.802778	0.606053		4	0.610997	0.00615744		5	0.641273	0.324066
1	0.80778	0.56466		2	0.844399	0.499866		3	0.802969	0.424958		4	0.612619	0.105708		5	0.641807	0.0172519
1	0.808732	0.787203		2	0.84481	1.62485		3	0.803227	0.0567925		4	0.613174	0.265398		5	0.642105	0.106934
1	0.808962	0.414161		2	0.84642	0.780117		3	0.803436	0.238376		4	0.613363	0.554324		5	0.64215	0.0489725
1	0.809178	0.31745		2	0.847125	0.640089		3	0.803671	0.509257		4	0.613386	1.62632		5	0.642554	0.194575
1	0.811369	0.593683		2	0.849492	0.032248		3	0.803996	1.0588		4	0.61369	2.63248		5	0.642829	0.281275
1	0.811781	0.320289		2	0.85017	0.0261512		3	0.804065	0.238376		4	0.613735	2.63248		5	0.6435	0.194575
1	0.81212	0.319537		2	0.850898	0.944372		3	0.804718	0.424958		4	0.613825	2.31611		5	0.64395	0.236452
1	0.812218	0.759882		2	0.850959	0.253163		3	0.804981	0.305138		4	0.614221	0.279204		5	0.644448	0.332504
1	0.812466	0.427675		2	0.85281	0.264659		3	0.805528	0.0988388		4	0.614668	0.151354		5	0.644588	0.0650965
1	0.812574	0.485491		2	0.853229	1.00563		3	0.805582	0.424958		4	0.615135	2.00451		5	0.644861	0.227452
1	0.812774	0.846771		2	0.853517	0.980737		3	0.808224	0.266198		4	0.61547	0.013687		5	0.645046	0.0613829
1	0.813001	0.120367		2	0.855003	0.389709		3	0.808895	0.273803		4	0.615808	0.586078		5	0.645339	0.236452
1	0.813018	0.940006		2	0.855208	0.174001		3	0.80947	0.575169		4	0.616105	1.38397		5	0.645736	0.0952493
1	0.813208	0.875997		2	0.856084	0.123441		3	0.809746	1.05701		4	0.616903	0.0805848		5	0.646084	0.0470991
1	0.814751	0.0918311		2	0.856141	0.0151036		3	0.810423	0.106361		4	0.618842	0.0805848		5	0.646397	0.0631778
1	0.81591	0.393935		2	0.856333	1.08265		3	0.81057	0.481386		4	0.618997	1.17244		5	0.646791	0.168351
1	0.818004	0.0437807		2	0.857749	0.428982		3	0.81081	1.00349		4	0.619161	0.962857		5	0.64726	0.0232806
1	0.818082	0.697427		2	0.859082	0.0379317		3	0.811309	0.487653		4	0.619411	0.0675211		5	0.647277	0.0450444
1	0.818672	0.266899		2	0.859157	1.263		3	0.81164	0.514444		4	0.619469	0.113244		5	0.647366	0.101199
1	0.820523	0.0573582		2	0.859184	0.425994		3	0.81205	0.313884		4	0.619737	0.117488		5	0.647564	0.139935
1	0.821282	0.904218		2	0.859522	0.371524		3	0.812313	0.239848		4	0.619929	0.873746		5	0.647703	0.240979
1	0.821772	0.290906		2	0.859618	0.123954		3	0.812599	0.0365073		4	0.620506	0.00914292		5	0.647952	0.139935
1	0.822975	0.388794		2	0.859902	0.0764261		3	0.812663	0.217865		4	0.62087	0.156715		5	0.648183	0.783369
1	0.823044	0.0347917		2	0.860141	0.0376631		3	0.813153	0.582234		4	0.620889	0.463562		5	0.648917	0.327377
1	0.824906	0.0239642		2	0.860269	0.161479		3	0.813335	0.0192177		4	0.621148	0.120039		5	0.64977	0.309018
1	0.828405	0.575653		2	0.860501	0.0613436		3	0.813561	0.0434872		4	0.621392	0.137144		5	0.650404	0.182379
1	0.828756	0.356151		2	0.860544	0.0946086		3	0.813816	0.190099		4	0.621475	0.225719		5	0.65112	0.210275
1	0.830155	0.0613492		2	0.860821	0.0747107		3	0.813894	0.0316249		4	0.621869	0.0730311		5	0.651611	0.171926
1	0.831063	0.846629		2	0.8611	0.50525		3	0.815004	0.0452404		4	0.622062	1.2435		5	0.651825	0.23019
1	0.834106	0.0856163		2	0.861298	0.175212		3	0.815058	0.301735		4	0.622109	0.216484		5	0.651927	0.0506563
1	0.836373	1.00545		2	0.861451	0.0453772		3	0.816435	0.131598		4	0.622184	0.458479		5	0.652183	1.5364
1	0.840038	0.315718		2	0.861567	0.66591		3	0.816674	0.0268034		4	0.622589	0.0616417		5	0.653203	0.0450649
1	0.842557	0.337227		2	0.861606	0.0390701		3	0.816872	0.0165485		4	0.622712	0.392553		5	0.653375	0.093283
1	0.843071	0.420998		2	0.862234	0.0592178		3	0.817701	0.358484		4	0.623123	0.0573419		5	0.65439	0.0090674
1	0.843195	0.472549		2	0.86237	0.692153		3	0.8186	0.701552		4	0.623181	0.250741		5	0.657693	0.357448
1	0.844883	0.629907		2	0.862456	0.243388		3	0.818644	1.28739		4	0.623897	0.0747685		5	0.657786	0.455866
1	0.846216	0.480401		2	0.862602	0.0279473		3	0.81889	0.563142		4	0.624532	1.35926		5	0.65801	0.296854
1	0.846925	0.338453		2	0.862616	0.20292		3	0.81901	0.524083		4	0.625415	0.250741		5	0.658557	0.464964
1	0.847476	0.154643		2	0.862725	0.392576		3	0.819817	1.17087		4	0.625569	0.680748		5	0.658775	0.778267
1	0.848012	0.193255		2	0.862863	0.547167		3	0.820012	0.252776		4	0.626988	0.467655		5	0.658926	0.723348
1	0.848166	0.648819		2	0.863086	0.02163		3	0.820141	1.28914		4	0.627016	0.20227		5	0.659693	0.0562876
1	0.84822	0.445974		2	0.863311	0.102878		3	0.820306	0.0853709		4	0.627889	0.151569		5	0.660387	0.00723168
1	0.849253	0.748779		2	0.864135	0.148358		3	0.822582	1.00508		4	0.627989	0.219959		5	0.660718	2.75622
1	0.849815	0.922676		2	0.864168	0.2738		3	0.823005	1.01085		4	0.630748	0.11974		5	0.661297	2.43606
1	0.850385	0.77707		2	0.864545	0.57908		3	0.823536	0.673432		4	0.630821	0.266438		5	0.662279	0.0831084
1	0.850504	0.30335		2	0.865819	0.647703		3	0.823792	0.453988		4	0.63099	0.104248		5	0.663028	0.665376
1	0.850724	0.0442226		2	0.866029	0.55703		3	0.823915	0.297887		4	0.631062	0.105087		5	0.666446	0.56626
1	0.850784	0.240395		2	0.866824	1.06131		3	0.824091	1.13464		4	0.631263	1.05534		5	0.667062	0.12115
1	0.851287	0.216383		2	0.86901	0.120789		3	0.824838	0.37253		4	0.631652	0.0614403		5	0.668714	0.949585
1	0.851389	0.141326		2	0.869792	0.201537		3	0.825056	0.396645		4	0.631775	0.0743603		5	0.66973	0.410705
1	0.851926	1.42981		2	0.871052	0.853244		3	0.825177	0.179946		4	0.632044	0.67113		5	0.669787	0.535246
1	0.85348	0.431683		2	0.874316	0.793441		3	0.82534	0.329531		4	0.632168	0.643776		5	0.673652	0.370121
1	0.854789	1.39178		2	0.874346	0.639757		3	0.825723	0.201547		4	0.632204	0.694938		5	0.673687	0.472537
1	0.856281	0.559514		2	0.875237	0.472169		3	0.82614	0.0818989		4	0.632396	0.456752		5	0.674212	0.398424
1	0.856737	0.222934		2	0.875971	0.501497		3	0.826363	0.143125		4	0.63262	0.237976		5	0.675932	1.0981
1	0.857784	0.292236		2	0.876112	0.85023		3	0.827838	0.0993385		4	0.632812	0.0887545		5	0.678728	0.0310106
1	0.857833	0.454874		2	0.876235	0.527198		3	0.828658	0.0911859		4	0.633109	0.673135		5	0.678901	0.882803
1	0.858591	0.367814		2	0.876627	0.995871		3	0.828725	0.203893		4	0.633453	0.0059887		5	0.679097	0.660021
1	0.860971	0.219046		2	0.877311	0.0239818		3	0.828806	0.92916		4	0.633609	0.902821		5	0.679127	0.129114
1	0.861283	0.265939		2	0.877559	0.235321		3	0.828987	0.294487		4	0.633627	0.150695		5	0.679747	0.0583822
1	0.861474	0.100375		2	0.877641	0.641462		3	0.829406	0.234841		4	0.633692	0.429999		5	0.679918	0.0491472
1	0.861547	0.166831		2	0.877712	0.52495		3	0.8298	0.860356		4	0.63379	0.195515		5	0.680099	0.00170675
1	0.861643	0.375194		2	0.878165	0.600945		3	0.829826	0.632494		4	0.633876	0.0867614		5	0.680562	0.095726
1	0.86198	0.0394973		2	0.878193	0.140058		3	0.830017	0.400349		4	0.633942	0.492679		5	0.680596	0.899469
1	0.862189	0.111412		2	0.878332	0.89498		3	0.830065	0.400349		4	0.634091	0.761605		5	0.680774	0.234969
1	0.862296	0.245625		2	0.879112	0.334322		3	0.831504	0.0612643		4	0.634324	0.00872946		5	0.680945	0.290454
1	0.862404	0.248284		2	0.879317	0.485874		3	0.832424	0.992781		4	0.634527	0.449257		5	0.681139	0.185494
1	0.862569	0.238894		2	0.880606	0.0569236		3	0.834046	1.11945		4	0.635072	1.30135		5	0.681458	0.0434178
1	0.86314	0.198439		2	0.881004	1.18163		3	0.835181	0.870367		4	0.635258	0.0372934		5	0.681752	0.0678965
1	0.863251	0.215946		2	0.881971	1.14542		3	0.837249	0.218296		4	0.635382	0.0360155		5	0.682892	0.358628
1	0.863498	0.189906		2	0.882256	0.695694		3	0.837369	0.496475		4	0.635535	0.48382		5	0.683922	0.0197864
1	0.863771	0.400895		2	0.882324	0.505774		3	0.837442	0.0527511		4	0.635792	1.26474		5	0.684276	0.0322774
1	0.863823	0.527938		2	0.882696	0.75632		3	0.838035	0.232904		4	0.635929	0.619864		5	0.684452	0.0493758
1	0.864335	0.459697		2	0.883192	0.679922		3	0.838066	0.514807		4	0.636687	1.60874		5	0.684636	0.0285671
1	0.864827	0.599303		2	0.88403	1.00288		3	0.840045	0.114067		4	0.637062	0.310867		5	0.685115	0.127249
1	0.864933	0.264101		2	0.884273	1.81892		3	0.840136	0.357646		4	0.639226	0.346361		5	0.685706	0.095257
1	0.866197	0.489243		2	0.889642	0.357081		3	0.840546	0.182366		4	0.639621	0.123929		5	0.686181	0.0962019
1	0.866355	0.00641692		2	0.892692	0.577132		3	0.84121	0.428368		4	0.639845	0.916014		5	0.686351	0.124312
1	0.867494	1.01305		2	0.898692	0.587081		3	0.842121	0.219174		4	0.639922	0.615918		5	0.686511	0.27841
1	0.868888	0.118844		2	0.898966	0.049315		3	0.843338	0.0638914		4	0.639943	0.736802		5	0.686974	0.0280716
1	0.870101	0.382563		2	0.899406	0.423559		3	0.843694	1.06599		4	0.640339	0.158029		5	0.687888	0.0197844
1	0.870311	0.772436		2	0.899637	1.19876		3	0.844493	0.119151		4	0.640366	0.200354		5	0.687958	0.111091
1	0.871787	0.900179		2	0.900038	1.4382		3	0.844774	0.104965		4	0.640873	1.44948		5	0.688854	0.0884849
1	0.872732	0.298502		2	0.900846	0.159053		3	0.845112	0.0494864		4	0.641244	0.097414		5	0.689098	0.0305212
1	0.873448	0.489909		2	0.90087	0.089883		3	0.845959	0.0226017		4	0.641324	0.144548		5	0.68929	0.891257
1	0.873732	0.0348779		2	0.901021	0.0603143		3	0.846108	0.018914		4	0.641578	0.235742		5	0.690688	0.0478739
1	0.874492	1.02611		2	0.901464	0.158042		3	0.846926	0.55858		4	0.642221	0.139802		5	0.690836	0.396457
1	0.874798	1.19185		2	0.902422	0.133118		3	0.847962	0.15037		4	0.642653	0.183914		5	0.691037	0.219787
1	0.874913	1.0246		2	0.902995	0.0118448		3	0.848767	0.105805		4	0.64317	0.705866		5	0.691177	0.0405574
1	0.875908	0.310629		2	0.903175	0.38446		3	0.848895	0.207124		4	0.643417	0.0286439		5	0.691263	0.00067985
1	0.876499	0.363259		2	0.903491	0.204333		3	0.848965	1.13214		4	0.643593	0.597651		5	0.691599	0.0162721
1	0.876718	0.0313597		2	0.903941	1.04711		3	0.849187	2.28418		4	0.643641	0.096528		5	0.691805	0.0366391
1	0.876817	0.236275		2	0.904181	0.0926981		3	0.849253	0.109463		4	0.643656	0.00451772		5	0.691822	0.346393
1	0.877193	1.06494		2	0.90425	0.0304103		3	0.849686	0.148504		4	0.643744	0.490921		5	0.692035	0.00864618
1	0.87745	0.148485		2	0.904347	0.549997		3	0.85001	0.202303		4	0.643773	0.12591		5	0.692124	0.0549339
1	0.877563	0.430926		2	0.904756	0.546687		3	0.850143	0.0328962		4	0.643923	0.0642642		5	0.692449	0.0297944
1	0.877841	0.543462		2	0.904817	0.0649688		3	0.850572	0.345214		4	0.643962	0.296002		5	0.692551	0.0445638
1	0.878757	0.112067		2	0.905972	0.539009		3	0.850611	0.00879122		4	0.644179	0.121445		5	0.692591	0.00864618
1	0.879097	0.379745		2	0.906033	0.471211		3	0.851154	0.0564098		4	0.644758	0.337826		5	0.692799	0.0844288
1	0.87943	1.44674		2	0.906651	0.0497824		3	0.851337	0.318239		4	0.645729	0.650557		5	0.692881	0.098902
1	0.879837	1.20423		2	0.907402	1.50712		3	0.851888	0.146978		4	0.645743	0.128093		5	0.69327	0.00620929
1	0.880588	0.648491		2	0.907417	0.0463518		3	0.852006	0.0289717		4	0.646688	0.585976		5	0.693484	0.256718
1	0.880612	1.35138		2	0.907824	0.0110066		3	0.852024	0.0131346		4	0.646762	1.22825		5	0.693504	0.325775
1	0.88174	0.419154		2	0.90825	0.0166904		3	0.852659	0.419862		4	0.646968	0.532144		5	0.693676	0.353031
1	0.882125	0.97885		2	0.908463	0.133118		3	0.853525	0.0182224		4	0.648082	0.395018		5	0.694307	0.273548
1	0.882154	0.14863		2	0.9091	0.0418644		3	0.853814	0.0655056		4	0.649334	0.448376		5	0.694535	0.137263
1	0.882633	0.650674		2	0.909281	0.979231		3	0.85398	0.0121382		4	0.650828	0.522738		5	0.6947	0.105197
1	0.882791	0.975563		2	0.915671	0.301247		3	0.855336	1.22352		4	0.651849	0.171973		5	0.694888	0.217654
1	0.882892	1.18313		2	0.915722	0.262732		3	0.855848	0.297569		4	0.652909	0.393991		5	0.695137	0.217719
1	0.884146	0.546165		2	0.916553	0.133763		3	0.856497	0.133621		4	0.652962	0.00690104		5	0.695445	0.998354
1	0.885184	0.890035		2	0.917217	0.0988723		3	0.859298	1.22352		4	0.653219	0.301627		5	0.69561	0.25011
1	0.885985	0.533591		2	0.917435	0.668561		3	0.860029	0.0786431		4	0.653829	0.477786		5	0.696012	0.879324
1	0.887158	0.411207		2	0.917594	0.594548		3	0.860338	0.345921		4	0.653888	0.558956		5	0.696192	1.1628
1	0.890883	0.509466		2	0.917657	0.719182		3	0.860613	0.339224		4	0.655269	0.408954		5	0.696373	0.262903
1	0.89146	0.384798		2	0.91803	0.531558		3	0.861091	0.187881		4	0.655289	1.7692		5	0.696991	0.12336
1	0.893077	0.26331		2	0.918371	0.11535		3	0.861878	0.21384		4	0.655534	0.528823		5	0.697259	0.299152
1	0.893461	0.897921		2	0.919123	0.0386893		3	0.862064	1.18817		4	0.655654	0.812958		5	0.697272	0.362941
1	0.893516	0.197767		2	0.919801	0.224422		3	0.862919	0.135171		4	0.655832	0.785692		5	0.697877	0.0753972
1	0.893865	0.563465		2	0.920993	0.000593978		3	0.863336	0.345921		4	0.657038	0.99147		5	0.698178	1.24892
1	0.894182	0.362497		2	0.921337	1.74317		3	0.864034	0.0212807		4	0.657521	0.272104		5	0.698328	0.561904
1	0.895405	0.428326		2	0.921582	0.216911		3	0.865232	0.504671		4	0.657655	0.157958		5	0.698552	0.428471
1	0.89547	0.418032		2	0.921668	0.0381079		3	0.865481	0.172616		4	0.658173	1.41241		5	0.698612	0.541197
1	0.896324	1.09053		2	0.92249	0.0407278		3	0.865566	0.736648		4	0.658358	0.0206912		5	0.700014	1.5316
1	0.896448	0.613082		2	0.92294	0.00419506		3	0.865782	0.386138		4	0.6586	0.0205871		5	0.700041	0.286482
1	0.896669	0.478778		2	0.923696	0.0175417		3	0.865994	0.578338		4	0.659088	0.625904		5	0.700239	0.626805
1	0.896852	0.327306		2	0.924679	0.703566		3	0.867228	0.599675		4	0.659169	0.041627		5	0.701204	0.380222
1	0.897316	0.320685		2	0.925191	0.479918		3	0.869304	1.3585		4	0.661559	0.165986		5	0.701461	0.0975381
1	0.897913	0.563323		2	0.925407	0.185966		3	0.870368	1.34542		4	0.664399	0.294903		5	0.702121	0.601453
1	0.898396	0.365785		2	0.925443	0.272293		3	0.871961	0.0126151		4	0.66442	0.0708046		5	0.702758	0.0114511
1	0.898665	0.0311258		2	0.925506	0.00260007		3	0.872992	0.194984		4	0.664453	0.122077		5	0.703556	0.365288
1	0.899667	0.364482		2	0.93075	0.0156519		3	0.873144	0.306779		4	0.664689	0.182871		5	0.703742	0.981924
1	0.899751	0.30612		2	0.931378	0.0994727		3	0.873439	0.334024		4	0.664869	0.152944		5	0.7042	0.50369
1	0.899804	0.150686		2	0.932057	0.0123561		3	0.873557	0.358881		4	0.665165	0.410467		5	0.705182	0.0422099
1	0.90037	0.845203		2	0.934249	0.140009		3	0.874994	2.50293		4	0.665544	0.729088		5	0.7052	0.215114
1	0.900444	0.139212		2	0.934899	0.0946247		3	0.875413	0.988291		4	0.666316	0.734477		5	0.705324	0.0175016
1	0.900522	0.719949		2	0.935356	0.0441183		3	0.875999	0.572805		4	0.666724	0.278586		5	0.705772	0.414187
1	0.900957	0.481029		2	0.935535	0.0441183		3	0.876695	1.8289		4	0.668484	0.391418		5	0.705788	0.0237015
1	0.901327	1.08263		2	0.935673	0.0441183		3	0.87744	0.251442		4	0.66865	0.418435		5	0.706103	0.811057
1	0.902497	0.00929158		2	0.93582	0.109408		3	0.877472	1.54769		4	0.668836	0.859447		5	0.707346	0.248838
1	0.903231	0.813296		2	0.935921	0.0943684		3	0.87825	0.0271854		4	0.669029	0.481129		5	0.707446	0.186975
1	0.905359	0.145302		2	0.935933	0.0441183		3	0.878387	0.161414		4	0.670047	0.131597		5	0.707516	0.85545
1	0.906223	0.0715629		2	0.935972	0.0441183		3	0.878467	0.00177108		4	0.670497	0.287161		5	0.707803	0.0852492
1	0.907682	0.753022		2	0.936071	0.175659		3	0.878904	1.91068		4	0.670662	0.59314		5	0.707823	0.140471
1	0.909235	0.184345		2	0.936375	0.0768454		3	0.87928	1.22352		4	0.670809	0.709508		5	0.707936	0.0111499
1	0.909636	0.235496		2	0.936668	0.0151688		3	0.88034	1.61996		4	0.670849	0.667969		5	0.709891	0.199287
1	0.911034	0.0299035		2	0.936683	0.0579755		3	0.880369	0.652663		4	0.671042	0.0951146		5	0.710492	0.140448
1	0.911586	0.404669		2	0.937319	0.0441183		3	0.883557	0.0978986		4	0.671145	0.0255853		5	0.710507	0.286991
1	0.911633	0.280831		2	0.937368	0.0441183		3	0.884368	2.35014		4	0.671174	0.231494		5	0.711038	0.848354
1	0.913933	0.485235		2	0.937907	0.247146		3	0.884623	1.33251		4	0.671224	0.899323		5	0.711298	0.142262
1	0.914087	0.167436		2	0.938168	0.0344122		3	0.884847	0.980443		4	0.671406	0.442742		5	0.711415	0.142262
1	0.914305	0.360215		2	0.938564	0.00575962		3	0.884996	1.07007		4	0.671896	0.191389		5	0.712019	0.056089
1	0.914461	0.399144		2	0.940706	0.288863		3	0.88512	0.583674		4	0.672086	0.123106		5	0.712677	0.438662
1	0.91455	0.0336578		2	0.941005	0.127331		3	0.885171	1.05635		4	0.672434	0.0562317		5	0.713918	0.532434
1	0.914689	0.0336578		2	0.941269	0.791698		3	0.885556	1.05881		4	0.673102	0.134954		5	0.714563	0.00364011
1	0.914799	0.101476		2	0.941574	0.180951		3	0.885721	1.24047		4	0.674151	0.406684		5	0.714584	0.233846
1	0.915514	0.424193		2	0.942052	0.398563		3	0.886035	0.562811		4	0.674182	0.239228		5	0.715579	0.0509874
1	0.915643	0.104251		2	0.942196	0.169714		3	0.886804	0.472536		4	0.674226	0.0144819		5	0.715889	0.00471711
1	0.915831	0.050704		2	0.94256	0.563701		3	0.88691	0.3194		4	0.674585	0.228209		5	0.71663	0.384416
1	0.915869	0.322208		2	0.942928	0.145597		3	0.887025	1.18066		4	0.674836	0.740817		5	0.716658	0.654435
1	0.915919	0.0512768		2	0.943617	0.809895		3	0.887169	2.15489		4	0.674981	0.133479		5	0.716824	0.150494
1	0.915981	0.0526285		2	0.943919	0.266859		3	0.887397	0.183256		4	0.675416	0.0287714		5	0.716883	0.706755
1	0.916431	0.111604		2	0.944313	0.0408968		3	0.887618	0.0783363		4	0.675801	0.47199		5	0.718393	0.542824
1	0.916616	0.0130599		2	0.944917	0.770885		3	0.888007	0.529126		4	0.675837	0.322704		5	0.723721	0.534987
1	0.916832	0.0329667		2	0.946793	0.450482		3	0.888049	0.0833741		4	0.67606	0.0326979		5	0.723737	0.053739
1	0.917604	0.122803		2	0.948609	0.145597		3	0.888157	0.404296		4	0.676085	0.644472		5	0.724536	1.16891
1	0.918131	0.163372		2	0.949405	1.00985		3	0.88863	0.936561		4	0.676616	0.542153		5	0.725086	0.732371
1	0.918319	0.28118		2	0.949623	0.289008		3	0.89148	0.58732		4	0.67678	0.171079		5	0.725297	0.110341
1	0.918862	0.514578		2	0.95146	0.48161		3	0.891564	0.244451		4	0.679491	0.333379		5	0.725882	0.90994
1	0.919213	0.848785		2	0.951475	0.48161		3	0.892502	0.2558		4	0.679555	0.265237		5	0.726537	1.59028
1	0.919273	0.4713		2	0.952351	0.209234		3	0.892663	0.218775		4	0.680779	0.142676		5	0.727092	0.613648
1	0.919309	0.163372		2	0.952474	1.08582		3	0.893899	0.371826		4	0.680793	0.113292		5	0.72805	0.674028
1	0.919572	0.34475		2	0.952897	0.0346276		3	0.89514	0.13386		4	0.681107	0.650729		5	0.728433	0.0273623
1	0.919781	0.00185653		2	0.95386	0.689911		3	0.895523	0.301847		4	0.681659	0.728831		5	0.729698	0.049859
1	0.920099	0.0079596		2	0.954391	0.201795		3	0.895578	0.081445		4	0.681832	0.175548		5	0.730999	0.110107
1	0.920243	0.0123629		2	0.954499	0.402063		3	0.89614	0.421992		4	0.681871	0.188173		5	0.731882	0.0469731
1	0.92133	0.348247		2	0.955739	0.374354		3	0.897021	0.301847		4	0.682033	0.272323		5	0.732573	0.449853
1	0.921399	0.112345		2	0.956449	0.390983		3	0.897576	0.301847		4	0.682218	0.523515		5	0.733599	1.21778
1	0.921888	0.0102821		2	0.956888	0.219107		3	0.898676	0.712711		4	0.682439	0.513803		5	0.734071	0.329175
1	0.922276	0.230393		2	0.957005	0.326535		3	0.899533	0.301847		4	0.682473	0.0522683		5	0.734335	0.110302
1	0.923111	0.74384		2	0.95806	0.0363596		3	0.899682	0.301847		4	0.685633	0.0658704		5	0.734395	0.820388
1	0.924182	0.477462		2	0.958394	0.00104194		3	0.900326	0.36663		4	0.685688	0.0874274		5	0.735301	0.190513
1	0.924511	0.0130916		2	0.95867	0.150885		3	0.900356	0.414242		4	0.685798	0.204704		5	0.735977	0.0809138
1	0.927438	0.301708		2	0.959568	0.365077		3	0.90077	0.43961		4	0.685822	0.0342758		5	0.736021	0.431561
1	0.928624	0.211637		2	0.959737	0.889144		3	0.901045	0.358653		4	0.686251	1.28689		5	0.736171	0.289786
1	0.930167	0.135199		2	0.959869	0.243523		3	0.904058	0.020339		4	0.686599	0.611735		5	0.736663	0.406741
1	0.930371	0.0428156		2	0.960191	0.216046		3	0.904428	2.12842		4	0.686936	0.653052		5	0.737141	0.0121067
1	0.930705	0.90752		2	0.960463	0.204018		3	0.904806	1.51115		4	0.687481	0.39702		5	0.737383	0.205354
1	0.930778	0.342111		2	0.961731	0.0253365		3	0.905	0.465709		4	0.687919	0.169546		5	0.737826	0.0301303
1	0.931534	0.179866		2	0.962549	0.0833857		3	0.905746	1.13156		4	0.687995	0.43622		5	0.738688	0.0286843
1	0.931578	0.108494		2	0.96282	0.0850811		3	0.90601	0.163056		4	0.688385	0.746422		5	0.738892	0.480681
1	0.932489	0.0307043		2	0.962884	0.421617		3	0.908011	0.0216089		4	0.688515	0.417157		5	0.740165	0.141292
1	0.932541	0.108583		2	0.963191	0.383499		3	0.909397	0.168024		4	0.688591	0.144848		5	0.740242	0.456227
1	0.932619	0.683124		2	0.963385	0.295437		3	0.909589	0.685073		4	0.688801	0.331303		5	0.740959	0.604593
1	0.932929	0.154013		2	0.963586	0.719211		3	0.910015	0.198048		4	0.688875	0.440832		5	0.741165	0.00520109
1	0.933606	0.731163		2	0.964273	0.217663		3	0.910253	0.0683905		4	0.68895	0.873394		5	0.74225	0.345722
1	0.934326	0.156298		2	0.964808	0.284615		3	0.910579	0.254628		4	0.689337	1.26935		5	0.743817	0.0597689
1	0.934952	0.273005		2	0.964992	0.0699144		3	0.911316	0.171996		4	0.68972	0.37198		5	0.743941	0.0335369
1	0.935256	0.191947		2	0.965082	0.0938319		3	0.9115	0.824611		4	0.689872	0.037906		5	0.745943	0.316355
1	0.935836	0.156298		2	0.966254	0.510191		3	0.912624	0.363433		4	0.6904	0.391376		5	0.747109	0.126211
1	0.938567	2.03533		2	0.966712	0.24031		3	0.912731	0.54914		4	0.692879	0.000997503		5	0.747747	0.234855
1	0.939975	0.00405565		2	0.96675	0.0912175		3	0.9128	0.204581		4	0.693291	0.400668		5	0.74875	0.291771
1	0.940911	0.590206		2	0.96677	0.178096		3	0.912861	0.294785		4	0.693448	0.207167		5	0.749961	0.0608871
1	0.940983	0.584859		2	0.96683	0.24489		3	0.913008	0.462528		4	0.694248	0.585219		5	0.750699	0.155693
1	0.941351	1.96129		2	0.967038	0.0489306		3	0.913252	1.26066		4	0.694305	0.713829		5	0.751148	0.155693
1	0.942263	1.96129		2	0.967637	0.0887253		3	0.913288	0.311573		4	0.694547	0.348224		5	0.753925	0.486678
1	0.942633	0.468481		2	0.967727	0.0275352		3	0.913305	0.39361		4	0.694916	1.24152		5	0.754099	0.20843
1	0.943185	0.123764		2	0.968399	0.011026		3	0.913729	0.453521		4	0.695542	0.907434		5	0.755389	0.00535335
1	0.944213	1.05924		2	0.968482	0.048661		3	0.915942	0.365862		4	0.695984	0.32433		5	0.758042	0.527022
1	0.945239	0.256013		2	0.968599	0.2226		3	0.919934	0.168408		4	0.696284	0.340731		5	0.759069	0.722089
1	0.945663	0.245816		2	0.968755	0.337439		3	0.921194	0.026419		4	0.696315	0.15258		5	0.759219	0.660872
1	0.945832	0.561839		2	0.96877	0.268197		3	0.921808	0.0238567		4	0.696559	0.19014		5	0.759354	0.712972
1	0.946286	0.0317042		2	0.968905	0.102397		3	0.923324	0.0094552		4	0.696883	0.300797		5	0.759511	0.807
1	0.946334	0.0916181		2	0.969295	0.219675		3	0.923572	0.308754		4	0.697452	0.401697		5	0.760171	0.75819
1	0.947228	0.00405565		2	0.969898	0.281661		3	0.923931	0.132333		4	0.697474	0.603336		5	0.760914	0.415447
1	0.948069	0.182401		2	0.970034	0.0154687		3	0.924101	0.142402		4	0.697528	1.58601		5	0.761503	0.290654
1	0.949022	0.178257		2	0.970479	0.256942		3	0.924199	0.00714358		4	0.697546	0.0371957		5	0.76172	1.01427
1	0.949793	0.097381		2	0.970566	0.205276		3	0.924688	0.151955		4	0.699064	0.266545		5	0.762297	0.151497
1	0.950255	0.267667		2	0.972067	0.332941		3	0.925507	0.0779277		4	0.6992	0.191394		5	0.762755	0.474223
1	0.950789	0.289007		2	0.972219	0.30132		3	0.926485	0.0613117		4	0.699292	0.423757		5	0.762819	0.0259471
1	0.95303	0.0951883		2	0.972986	0.30942		3	0.927633	0.0136633		4	0.699512	0.598971		5	0.763051	0.753692
1	0.954065	0.656889		2	0.973063	0.128813		3	0.927961	0.394571		4	0.700037	0.980697		5	0.763701	0.0731895
1	0.954851	0.197216		2	0.973112	0.0163734		3	0.928194	0.131295		4	0.700403	0.00662934		5	0.765264	0.0392561
1	0.954958	0.529693		2	0.973844	0.102053		3	0.928232	0.278455		4	0.700433	0.117508		5	0.765471	0.278202
1	0.955223	0.121672		2	0.974016	0.143867		3	0.929238	0.0951583		4	0.700492	0.0302277		5	0.765617	0.221171
1	0.955303	1.41849		2	0.974196	0.0942799		3	0.929837	0.362377		4	0.700775	0.698788		5	0.766625	0.764287
1	0.95538	0.403611		2	0.974295	0.151248		3	0.929911	0.146414		4	0.700978	0.317206		5	0.766726	0.155617
1	0.955556	0.109706		2	0.974691	0.158181		3	0.930416	0.13094		4	0.701017	0.317206		5	0.767065	0.225634
1	0.955834	0.197216		2	0.974769	0.182645		3	0.931437	0.551951		4	0.70144	0.395176		5	0.767312	0.116221
1	0.956146	0.102373		2	0.974937	0.0787384		3	0.931507	0.430886		4	0.701516	0.0385089		5	0.767403	0.00699116
1	0.956686	0.0199859		2	0.975135	0.0617249		3	0.933402	0.0755011		4	0.701659	0.235831		5	0.767636	0.14555
1	0.9576	0.0360616		2	0.975183	0.182387		3	0.934039	1.41975		4	0.702353	0.491126		5	0.768852	0.137334
1	0.960345	0.176052		2	0.975258	0.210215		3	0.935188	0.0491526		4	0.704273	0.428853		5	0.768899	0.0416382
1	0.960927	0.0993385		2	0.975408	0.158181		3	0.936092	0.453105		4	0.704389	0.507723		5	0.77139	0.550314
1	0.961984	0.319805		2	0.975918	0.290373		3	0.936274	0.161116		4	0.704632	0.237688		5	0.771723	1.08743
1	0.96236	0.42047		2	0.976153	0.261422		3	0.937647	0.513848		4	0.704671	0.237688		5	0.771884	1.88011
1	0.963469	0.42047		2	0.976276	0.105195		3	0.93811	0.33737		4	0.704839	0.29405		5	0.771967	1.03597
1	0.963947	0.00457676		2	0.976777	0.0492225		3	0.938463	0.695815		4	0.704899	0.242464		5	0.772515	0.304203
1	0.964189	0.110265		2	0.97787	0.152134		3	0.93861	0.14969		4	0.705089	0.261111		5	0.772596	0.0679554
1	0.965019	0.42047		2	0.978465	0.69015		3	0.939959	1.08046		4	0.705351	0.608925		5	0.77286	0.675779
1	0.966113	0.227992		2	0.978754	0.390173		3	0.940328	0.172658		4	0.705576	0.561647		5	0.773111	0.0438093
1	0.966685	0.42047		2	0.978817	0.448255		3	0.940944	0.0346566		4	0.706513	0.787916		5	0.77353	0.0453572
1	0.966876	0.674103		2	0.97908	0.0621652		3	0.941544	0.504093		4	0.707557	0.339692		5	0.774452	0.314793
1	0.967883	0.177972		2	0.979338	0.142507		3	0.941897	0.0657065		4	0.707576	0.875616		5	0.774496	1.57877
1	0.968751	0.629747		2	0.97956	0.609175		3	0.941981	0.113867		4	0.708115	0.0225724		5	0.774565	1.3787
1	0.970895	0.0158541		2	0.979621	0.151906		3	0.94345	0.427319		4	0.708305	0.0642205		5	0.77489	2.00318
1	0.974971	0.500711		2	0.979793	0.560081		3	0.943944	0.086008		4	0.708467	0.468124		5	0.775163	0.339822
1	0.976432	0.415286		2	0.980645	0.191273		3	0.944275	0.649216		4	0.708666	1.33362		5	0.775349	0.697183
1	0.977557	0.501749		2	0.980704	0.639618		3	0.944311	0.0113993		4	0.70873	0.662587		5	0.775517	0.943846
1	0.978362	0.993066		2	0.981445	0.190465		3	0.94457	0.242701		4	0.708867	0.17888		5	0.775607	1.14863
1	0.978777	0.919452		2	0.982453	0.808602		3	0.94843	0.168061		4	0.709097	0.929082		5	0.775785	0.393732
1	0.979044	1.13111		2	0.983429	0.238581		3	0.948615	0.234611		4	0.709289	0.0409915		5	0.77588	0.372871
1	0.980477	0.61081		2	0.984022	0.418754		3	0.950683	0.0945034		4	0.710256	0.689876		5	0.776081	1.16699
1	0.981898	0.656273		2	0.985137	0.328978		3	0.951638	0.105684		4	0.710316	0.201246		5	0.776114	0.212553
1	0.982303	0.109979		2	0.985183	0.0166474		3	0.952434	0.207259		4	0.710837	0.172557		5	0.776231	1.45761
1	0.982534	0.15626		2	0.985249	0.327624		3	0.952644	0.364462		4	0.71229	0.0284226		5	0.776349	1.44331
1	0.984478	0.0192742		2	0.985372	0.183815		3	0.953381	0.00907158		4	0.713314	0.41172		5	0.776377	1.35569
1	0.991977	0.194653		2	0.985453	0.240191		3	0.953551	0.248843		4	0.713957	0.260849		5	0.776512	0.0563355
1	0.992262	0.193182		2	0.985618	0.0943134		3	0.954737	0.946969		4	0.714215	0.966886		5	0.776901	1.64058
1	0.99233	0.264816		2	0.986515	0.761426		3	0.955081	0.768681		4	0.715502	0.00511538		5	0.776939	0.729159
1	0.993354	0.487002		2	0.986795	0.76458		3	0.955686	0.011994		4	0.716012	0.0723824		5	0.777203	1.05499
1	0.993374	1.21641		2	0.987849	0.10263		3	0.955825	0.0961397		4	0.716066	0.210811		5	0.777564	0.0966723
1	0.994289	0.12004		2	0.98792	0.400932		3	0.956287	0.302929		4	0.716528	0.428565		5	0.778154	0.421251
1	0.994305	0.68936		2	0.988154	0.122612		3	0.956409	0.16946		4	0.716594	1.04862		5	0.778317	0.552083
1	1.0027	0.0450787		2	0.988556	0.220383		3	0.956665	0.30176		4	0.716607	0.725133		5	0.778381	0.321383
1	1.00333	0.72269		2	0.989168	0.0682811		3	0.956837	0.109218		4	0.71732	0.0304185		5	0.778405	1.57825
1	1.00392	0.0704016		2	0.989933	0.181508		3	0.957018	0.0364397		4	0.717707	0.4294		5	0.77869	1.24024
1	1.00557	0.0646514		2	0.99005	0.0890204		3	0.957212	0.0130647		4	0.71964	0.0580406		5	0.778798	0.391326
1	1.00587	0.018838		2	0.990449	0.366467		3	0.957277	0.2468		4	0.720003	0.0889203		5	0.779144	0.643701
1	1.00723	0.0709206		2	0.990629	1.12593		3	0.957328	0.250466		4	0.720108	1.19966		5	0.779229	1.94251
1	1.00756	0.0945868		2	0.991053	0.713945		3	0.957701	0.0384609		4	0.720307	0.642628		5	0.780559	0.292062
1	1.00782	0.118739		2	0.991614	0.461427		3	0.957875	0.0384609		4	0.720778	0.962986		5	0.780824	0.133353
1	1.00795	0.0575806		2	0.991711	0.23567		3	0.959233	0.00295392		4	0.720995	0.100007		5	0.780951	0.0795299
1	1.00828	0.0270449		2	0.992463	0.0509298		3	0.961186	0.0409784		4	0.721178	0.0844564		5	0.780988	0.713866
1	1.01016	0.143482		2	0.992792	0.0662197		3	0.961845	0.0386726		4	0.721592	0.0902807		5	0.781544	0.0429211
1	1.01035	0.246275		2	0.993358	0.164274		3	0.962427	0.057609		4	0.721726	0.332972		5	0.782088	0.00552412
1	1.01172	0.0255291		2	0.993738	0.0423989		3	0.963035	0.304274		4	0.7231	0.107283		5	0.783566	0.0486494
1	1.01186	0.107752		2	0.99542	0.254711		3	0.96339	0.165594		4	0.723145	0.206695		5	0.783695	0.580642
1	1.01271	0.0193016		2	0.995615	0.177549		3	0.963752	0.0698591		4	0.723354	0.147881		5	0.783888	0.204897
1	1.01317	0.127634		2	0.996301	0.212563		3	0.963904	0.102698		4	0.723974	0.392544		5	0.784293	0.102863
1	1.01374	0.645624		2	0.996718	0.121505		3	0.964091	0.381009		4	0.724139	0.136391		5	0.784549	0.0704709
1	1.01385	0.156496		2	0.99674	0.0827784		3	0.964106	0.165594		4	0.725452	0.815074		5	0.784572	0.26139
1	1.01921	0.721149		2	0.997076	0.0705946		3	0.964322	0.0698591		4	0.726005	0.405991		5	0.785849	0.473922
1	1.02029	0.0545227		2	0.997389	0.0890871		3	0.96452	0.226197		4	0.726816	0.51669		5	0.785977	0.476668
1	1.02129	0.136985		2	0.997443	0.0179937		3	0.964586	0.0575811		4	0.727321	0.680358		5	0.786173	0.841717
1	1.02179	0.102962		2	0.997689	0.114776		3	0.964784	0.300123		4	0.727364	1.05546		5	0.786323	0.130149
1	1.02208	0.0409226		2	0.998162	0.0154289		3	0.965407	0.130778		4	0.727589	0.0984152		5	0.786824	0.24697
1	1.02271	0.13194		2	0.99818	0.168895		3	0.965812	0.0614314		4	0.728111	0.565635		5	0.787109	0.0723988
1	1.02669	0.466177		2	0.999354	0.370957		3	0.965921	0.0830531		4	0.728523	0.372474		5	0.7875	0.0959468
1	1.02705	0.460119		2	0.999496	0.0603728		3	0.965976	0.136418		4	0.729214	1.33676		5	0.787572	0.102869
1	1.02791	0.205782		2	0.999526	0.470598		3	0.966023	0.084351		4	0.731447	0.44187		5	0.787593	0.00590103
1	1.02863	0.0984605		2	1.00031	0.19642		3	0.966436	0.335007		4	0.731635	0.567817		5	0.787817	1.06022
1	1.02916	0.355801		2	1.00034	0.573198		3	0.966475	0.356776		4	0.73218	0.00759288		5	0.788141	0.639968
1	1.02921	0.215717		2	1.00058	1.27827		3	0.966794	0.255306		4	0.73222	0.642628		5	0.788155	1.11333
1	1.02953	0.00391478		2	1.00115	0.491571		3	0.966942	0.206438		4	0.73314	0.30089		5	0.788311	0.192424
1	1.03096	0.368766		2	1.00216	0.593781		3	0.96717	0.0270872		4	0.734332	0.120225		5	0.788365	0.320219
1	1.03126	0.108295		2	1.00224	0.188384		3	0.967321	0.107318		4	0.734884	0.150723		5	0.788801	0.188983
1	1.03174	0.466177		2	1.00308	0.136197		3	0.967703	0.200554		4	0.735001	0.0904788		5	0.788929	0.0381589
1	1.03188	0.176386		2	1.00312	0.0160047		3	0.967936	0.158412		4	0.73537	0.0979529		5	0.78935	0.380863
1	1.03219	0.376978		2	1.00433	0.0913076		3	0.968225	0.537829		4	0.735453	0.511877		5	0.789422	0.103033
1	1.03251	0.146154		2	1.00779	0.125786		3	0.968414	0.0469748		4	0.735642	0.506965		5	0.790099	0.0887722
1	1.03488	0.0890409		2	1.00828	0.833497		3	0.96859	0.0140803		4	0.735796	0.34818		5	0.790506	0.4372
1	1.03545	0.148234		2	1.00829	0.405972		3	0.969067	0.139954		4	0.736303	0.235929		5	0.790612	0.148051
1	1.03565	0.201084		2	1.00857	0.0529682		3	0.969519	0.635135		4	0.736489	0.0580702		5	0.790824	1.26493
1	1.03568	0.222821		2	1.00862	0.0613936		3	0.969922	0.112303		4	0.736577	0.183491		5	0.790919	0.474229
1	1.03576	0.0720833		2	1.00888	0.171285		3	0.970165	0.0663771		4	0.736841	0.0561897		5	0.791232	0.332554
1	1.03648	0.0101545		2	1.00899	0.858467		3	0.970664	0.0703884		4	0.737253	0.00252603		5	0.791854	0.130429
1	1.03705	0.220379		2	1.01346	0.313643		3	0.970948	0.512547		4	0.73733	0.593822		5	0.791944	0.174859
1	1.03721	0.466177		2	1.01367	0.340288		3	0.971106	0.0770028		4	0.737856	0.265083		5	0.792447	0.281172
1	1.03742	0.262547		2	1.01426	0.163788		3	0.971368	0.0609856		4	0.73791	0.914401		5	0.792678	0.0434766
1	1.03926	0.480817		2	1.0145	0.28883		3	0.971654	0.0849081		4	0.738217	0.128754		5	0.792726	0.0156574
1	1.03928	0.466177		2	1.01484	0.079201		3	0.971974	0.0528161		4	0.738592	0.366965		5	0.793042	0.339756
1	1.04181	0.223535		2	1.01493	0.282643		3	0.972299	0.093624		4	0.740385	0.330369		5	0.793317	0.141377
1	1.0419	0.144442		2	1.0154	0.0240754		3	0.972758	0.276319		4	0.740734	0.6035		5	0.793424	0.868402
1	1.04193	0.225033		2	1.01554	0.0693156		3	0.972969	0.105074		4	0.740892	0.495123		5	0.793618	0.277852
1	1.04199	0.184216		2	1.01574	0.546674		3	0.973287	0.924114		4	0.740962	0.172847		5	0.793689	0.0211995
1	1.04219	0.100041		2	1.01657	0.449938		3	0.973482	0.204905		4	0.744038	0.298555		5	0.793885	0.30711
1	1.04232	0.198264		2	1.0168	0.474056		3	0.973697	0.0654802		4	0.7441	0.0073507		5	0.793919	0.318761
1	1.04236	0.0846972		2	1.01688	0.384625		3	0.97387	0.137057		4	0.744219	0.968954		5	0.794951	0.546791
1	1.04289	0.107787		2	1.01764	0.274269		3	0.97406	1.17802		4	0.746534	0.229849		5	0.794964	1.21874
1	1.04435	0.163377		2	1.01818	2.3501		3	0.974331	0.093624		4	0.748867	0.926057		5	0.795139	0.707028
1	1.0448	0.251674		2	1.01823	0.793432		3	0.974532	0.0728437		4	0.749279	0.207814		5	0.795328	0.167399
1	1.04555	0.0527934		2	1.01939	1.27366		3	0.974557	0.112303		4	0.750292	1.27009		5	0.795416	0.466551
1	1.04598	0.275225		2	1.01982	0.538922		3	0.975009	0.259344		4	0.75039	1.45428		5	0.795807	0.936423
1	1.04604	0.245199		2	1.01984	0.13468		3	0.975327	0.00961481		4	0.750444	0.972365		5	0.79652	3.24082
1	1.04674	0.3249		2	1.01991	0.0193326		3	0.975525	0.135476		4	0.750562	0.924399		5	0.796602	0.341598
1	1.04715	0.122848		2	1.02023	0.268929		3	0.975705	0.18997		4	0.750917	0.603796		5	0.796734	1.20528
1	1.0473	0.199067		2	1.02028	0.41244		3	0.97581	0.139954		4	0.75094	0.162532		5	0.796958	0.644851
1	1.04761	0.00672859		2	1.02048	0.024099		3	0.976605	0.040918		4	0.75105	0.998053		5	0.797221	0.664756
1	1.04773	0.692662		2	1.02081	0.6328		3	0.976674	0.35322		4	0.751223	0.374113		5	0.797514	0.334098
1	1.04838	0.0684996		2	1.02091	0.658582		3	0.978452	0.0551888		4	0.751434	0.789403		5	0.797843	0.243287
1	1.05202	0.0816697		2	1.02097	0.180185		3	0.978513	0.0138565		4	0.751568	0.140795		5	0.798241	3.3655
1	1.05235	0.073633		2	1.02116	0.128841		3	0.979153	0.407549		4	0.751662	1.22645		5	0.798257	0.0794164
1	1.05297	0.521637		2	1.02153	0.278377		3	0.980147	0.346764		4	0.752857	0.0739216		5	0.798465	0.706932
1	1.05472	0.171028		2	1.02231	0.0368399		3	0.980419	0.241753		4	0.752912	0.0810138		5	0.798576	0.0842971
1	1.05562	0.0301086		2	1.02256	0.146366		3	0.980437	0.576088		4	0.753661	0.339821		5	0.798675	0.0375542
1	1.05566	0.194755		2	1.02266	0.448286		3	0.98057	1.00743		4	0.753722	0.540044		5	0.798775	0.173997
1	1.05623	0.0942113		2	1.02307	0.352772		3	0.98067	0.0200959		4	0.753823	0.292176		5	0.798936	0.147194
1	1.05809	0.0301086		2	1.02346	0.54271		3	0.980799	0.040504		4	0.754125	0.0559848		5	0.799161	0.11756
1	1.05811	0.0800741		2	1.02396	0.419825		3	0.982243	0.313813		4	0.754316	0.284583		5	0.799226	0.0467522
1	1.05869	0.194755		2	1.02484	0.78358		3	0.982395	0.326674		4	0.75464	0.283379		5	0.799388	0.63797
1	1.06009	0.073633		2	1.02502	0.0152261		3	0.982572	0.108703		4	0.755415	0.241312		5	0.799456	0.059152
1	1.06058	0.290434		2	1.02519	0.118864		3	0.98267	0.477888		4	0.75564	0.121917		5	0.800478	0.0521662
1	1.06078	0.842758		2	1.02553	0.875771		3	0.982945	0.592365		4	0.755676	0.977838		5	0.800616	0.0425125
1	1.0633	0.0687702		2	1.0257	0.398419		3	0.983113	0.222736		4	0.75583	0.379356		5	0.80116	0.0936171
1	1.06446	0.230694		2	1.02587	0.19061		3	0.98345	0.790702		4	0.756753	0.522267		5	0.801376	0.540343
1	1.06684	0.00336702		2	1.02762	0.00304597		3	0.983628	0.345183		4	0.756806	0.0273246		5	0.801546	0.131353
1	1.06788	0.197729		2	1.02835	0.200394		3	0.983687	0.334747		4	0.758365	0.240718		5	0.801599	0.822675
1	1.06804	0.00718282		2	1.02852	0.101208		3	0.986536	0.263481		4	0.758439	0.200656		5	0.801638	0.717382
1	1.07046	0.23749		2	1.02858	0.248004		3	0.986614	0.197909		4	0.758794	0.0706604		5	0.802226	0.205893
1	1.07281	0.701599		2	1.02885	0.185314		3	0.987159	0.266917		4	0.75971	0.674936		5	0.802507	0.210612
1	1.07309	0.0331119		2	1.02894	0.514888		3	0.987351	0.166549		4	0.760107	0.243405		5	0.802666	0.170065
1	1.07316	0.145181		2	1.02899	0.909346		3	0.987531	0.406967		4	0.760214	0.280054		5	0.802734	0.0977578
1	1.07366	0.21578		2	1.02925	0.496205		3	0.987565	0.617939		4	0.761119	1.23575		5	0.802883	0.115219
1	1.07378	0.465573		2	1.02936	0.181622		3	0.987691	0.106455		4	0.761378	0.963949		5	0.802901	0.144864
1	1.07413	0.32389		2	1.02969	0.530063		3	0.988098	0.00651157		4	0.762587	0.503697		5	0.803188	0.143183
1	1.07438	0.353106		2	1.02984	0.375283		3	0.988214	0.25459		4	0.762873	0.542976		5	0.803205	0.116425
1	1.07484	0.384666		2	1.03002	0.186685		3	0.989598	0.126283		4	0.763043	0.291331		5	0.803266	0.436157
1	1.07631	0.580552		2	1.03006	0.0114098		3	0.990303	0.0434389		4	0.76325	0.126033		5	0.803493	0.12397
1	1.0765	0.323266		2	1.03054	0.0188022		3	0.990416	1.1589		4	0.764698	0.262932		5	0.803632	0.239044
1	1.07692	0.233971		2	1.03073	0.904082		3	0.990474	0.583975		4	0.764752	0.835644		5	0.803848	0.586722
1	1.07751	0.692564		2	1.03078	0.348047		3	0.990664	0.738962		4	0.766605	0.0394922		5	0.804208	0.116425
1	1.07773	0.332208		2	1.03079	0.557119		3	0.991186	1.39847		4	0.766706	0.802396		5	0.804249	0.042199
1	1.07916	0.392241		2	1.03094	0.630729		3	0.991733	0.0139874		4	0.767765	1.34324		5	0.804959	0.653441
1	1.07964	0.0884165		2	1.03122	0.70796		3	0.992383	0.280222		4	0.767827	0.734943		5	0.805026	0.00969997
1	1.08248	0.343345		2	1.03149	0.796715		3	0.993127	0.428872		4	0.7685	0.00199011		5	0.805114	0.122169
1	1.08351	0.0711048		2	1.03172	0.0308098		3	0.993184	0.244048		4	0.768749	0.191274		5	0.805181	0.0889564
1	1.08613	0.26949		2	1.03193	0.148721		3	0.993303	0.409025		4	0.769876	0.267198		5	0.805423	0.145408
1	1.08639	0.268898		2	1.03241	0.457157		3	0.993886	0.298656		4	0.770095	0.823018		5	0.80553	0.189396
1	1.08673	0.447903		2	1.03257	0.119452		3	0.993936	0.352295		4	0.770229	0.96362		5	0.805783	0.559557
1	1.08687	0.132214		2	1.03389	0.861921		3	0.994091	0.204499		4	0.770436	0.0376701		5	0.806858	0.149644
1	1.08699	0.00251067		2	1.03415	0.177046		3	0.994474	0.180191		4	0.770513	0.18898		5	0.806882	0.261039
1	1.08711	0.428488		2	1.03439	0.198258		3	0.994568	0.0173213		4	0.770702	0.736313		5	0.807229	0.281399
1	1.08736	0.00888416		2	1.03447	0.0730899		3	0.994821	0.191034		4	0.770921	1.58544		5	0.807318	0.515413
1	1.0878	0.052959		2	1.03453	0.0543158		3	0.995029	0.0184465		4	0.77104	0.541085		5	0.807571	0.150362
1	1.08803	0.403309		2	1.03477	0.0961615		3	0.999454	0.114626		4	0.771509	0.324982		5	0.807754	0.562983
1	1.08818	0.823997		2	1.03485	0.0965871		3	1.00049	0.124274		4	0.77163	1.4173		5	0.8078	0.71924
1	1.08844	0.590685		2	1.03589	0.26334		3	1.00091	0.233874		4	0.772109	0.860947		5	0.808132	0.135293
1	1.08912	0.0932546		2	1.03665	0.360903		3	1.00095	0.11157		4	0.772594	0.50503		5	0.808283	0.011914
1	1.08921	0.0109434		2	1.03682	0.249391		3	1.00104	0.128241		4	0.772714	1.60482		5	0.808365	0.318131
1	1.08954	0.590685		2	1.03699	0.82117		3	1.00117	0.0768873		4	0.773675	1.52754		5	0.808607	0.0652549
1	1.0897	0.408378		2	1.03709	0.00919701		3	1.0015	0.0878342		4	0.773974	0.839403		5	0.808826	0.0648528
1	1.08973	0.415395		2	1.03768	0.410252		3	1.00152	0.266444		4	0.774462	0.531854		5	0.808865	0.0141369
1	1.09205	0.345558		2	1.03784	0.404037		3	1.00158	0.180854		4	0.775205	0.64561		5	0.809032	0.0288732
1	1.0922	0.590685		2	1.03966	0.182053		3	1.00232	0.391733		4	0.775349	0.754127		5	0.809201	0.220881
1	1.09233	0.462265		2	1.03981	0.276463		3	1.00241	0.180854		4	0.775557	0.384704		5	0.809385	0.170274
1	1.09276	0.773274		2	1.0399	0.302758		3	1.00256	0.104728		4	0.775576	0.663011		5	0.809934	0.0383581
1	1.09289	0.150483		2	1.04051	0.276955		3	1.00314	0.449037		4	0.775982	1.22262		5	0.810273	0.117195
1	1.09336	0.114987		2	1.0407	0.202037		3	1.00344	0.174531		4	0.776125	0.543392		5	0.810431	0.47573
1	1.09339	0.415395		2	1.04167	0.0903282		3	1.00351	0.459776		4	0.776326	0.168204		5	0.810625	0.554753
1	1.09357	0.590685		2	1.04172	0.035758		3	1.00354	0.0468483		4	0.776436	0.818752		5	0.810769	0.431731
1	1.09395	0.590685		2	1.042	0.26654		3	1.00361	0.252147		4	0.776513	0.463496		5	0.810955	0.261802
1	1.09407	0.801938		2	1.04209	0.903313		3	1.00387	0.000543953		4	0.776598	0.265293		5	0.811174	0.270661
1	1.09476	0.415395		2	1.04302	1.25744		3	1.00391	0.409624		4	0.776882	0.608005		5	0.81148	0.613668
1	1.09487	0.590685		2	1.04378	0.613737		3	1.00471	0.729665		4	0.778509	1.1144		5	0.811786	0.205184
1	1.095	0.387459		2	1.04396	0.355058		3	1.00483	0.0357599		4	0.778748	0.360741		5	0.812017	0.493862
1	1.09533	0.101589		2	1.04402	0.320432		3	1.00594	0.0925934		4	0.779389	0.140714		5	0.812121	0.0888224
1	1.09549	0.0850458		2	1.04407	0.123531		3	1.00601	0.00524502		4	0.779608	0.753735		5	0.812335	0.0194027
1	1.09613	0.321096		2	1.04425	0.609692		3	1.00607	0.410793		4	0.779788	0.294643		5	0.812383	0.261508
1	1.09665	0.089911		2	1.04447	0.320432		3	1.00731	0.0400791		4	0.78033	0.858026		5	0.8125	0.4446
1	1.0972	0.293361		2	1.04477	0.0617102		3	1.0076	0.491766		4	0.780842	1.10642		5	0.812733	0.193611
1	1.09738	0.533653		2	1.04487	0.6875		3	1.00769	0.0262832		4	0.781252	0.24269		5	0.812801	0.307652
1	1.09776	0.612551		2	1.04524	0.152963		3	1.00789	0.456146		4	0.781277	0.317483		5	0.812845	0.149821
1	1.09792	0.329001		2	1.0463	1.01136		3	1.00803	0.269446		4	0.781723	0.0209315		5	0.812897	0.206545
1	1.09805	0.431882		2	1.04657	0.479433		3	1.00831	0.601212		4	0.781797	0.126576		5	0.813123	0.257661
1	1.09858	0.552137		2	1.04681	0.478358		3	1.00865	0.0996578		4	0.782119	0.307293		5	0.813262	0.152045
1	1.09865	0.588905		2	1.04687	0.00989945		3	1.00979	0.0503048		4	0.782203	0.00913513		5	0.81438	0.42016
1	1.09882	0.392748		2	1.04829	0.120638		3	1.0099	0.118227		4	0.782337	1.05416		5	0.814585	0.429264
1	1.09889	1.19333		2	1.04947	0.339298		3	1.0101	0.0605459		4	0.782592	0.246832		5	0.814644	0.34092
1	1.09906	0.431882		2	1.05141	0.603198		3	1.01072	0.448001		4	0.782763	0.29627		5	0.814778	0.0659236
1	1.09922	0.268602		2	1.05233	0.909211		3	1.01089	0.0967235		4	0.782829	1.03618		5	0.81484	0.39727
1	1.0995	0.755423		2	1.05293	0.217363		3	1.011	0.132277		4	0.782877	0.265742		5	0.815104	0.629347
1	1.1003	0.431882		2	1.05329	0.186054		3	1.01119	0.396733		4	0.782911	0.65111		5	0.815183	0.868299
1	1.10041	0.340904		2	1.05594	2.10372		3	1.01134	0.0499287		4	0.783135	0.242049		5	0.815196	0.784393
1	1.10179	0.557858		2	1.0561	0.320351		3	1.01144	0.078768		4	0.783256	0.0996313		5	0.815246	0.249522
1	1.10231	0.331362		2	1.05614	0.0495565		3	1.01183	0.30026		4	0.783577	0.454052		5	0.815347	0.465031
1	1.10233	0.822663		2	1.05657	0.0462057		3	1.01219	0.126464		4	0.783727	0.677869		5	0.815457	0.955245
1	1.10493	0.061354		2	1.05713	0.695399		3	1.01242	0.0162301		4	0.783853	0.0110074		5	0.815512	0.0109574
1	1.1051	0.295477		2	1.05738	0.203233		3	1.01256	0.0354831		4	0.783958	0.0207642		5	0.815609	0.139016
1	1.10567	0.567907		2	1.05772	0.674592		3	1.0134	0.219614		4	0.784397	0.0562237		5	0.815836	1.01357
1	1.10701	0.0249011		2	1.05855	0.40667		3	1.01388	0.518153		4	0.784554	0.402992		5	0.815854	0.819703
1	1.10846	0.639426		2	1.06104	0.690138		3	1.01509	0.251399		4	0.78512	0.0631266		5	0.816045	0.866238
1	1.11201	0.134328		2	1.06291	0.111074		3	1.01526	0.182527		4	0.785293	0.370885		5	0.816628	0.587051
1	1.11252	0.134328		2	1.06445	0.0472116		3	1.01622	0.0671075		4	0.786597	0.120795		5	0.816889	0.200824
1	1.11275	0.0525665		2	1.06456	0.171626		3	1.01747	0.26881		4	0.787126	1.18121		5	0.817171	0.27816
1	1.11295	0.230275		2	1.06488	0.384143		3	1.01791	0.356065		4	0.787781	0.125357		5	0.817566	0.0237966
1	1.11306	0.250034		2	1.06508	0.323652		3	1.01857	0.853997		4	0.788046	0.547233		5	0.817788	0.0652128
1	1.11335	0.295399		2	1.06655	1.7209		3	1.02013	0.206169		4	0.788348	0.414038		5	0.81795	0.00772671
1	1.11368	0.233288		2	1.07194	0.270001		3	1.02027	0.0436247		4	0.788629	0.235084		5	0.818235	0.0630131
1	1.11413	0.304208		2	1.072	0.289432		3	1.02108	0.696473		4	0.78962	0.0504041		5	0.818485	0.110333
1	1.1148	0.640534		2	1.07207	0.268218		3	1.02144	0.163638		4	0.79024	0.199551		5	0.818583	0.283246
1	1.11552	0.359641		2	1.07273	1.05851		3	1.02167	0.915812		4	0.791569	0.0643606		5	0.818705	0.0742779
1	1.1156	0.606456		2	1.07276	1.15975		3	1.02191	1.06882		4	0.793627	0.380999		5	0.818989	0.0146623
1	1.11681	0.834704		2	1.07311	0.0477661		3	1.02207	0.0619984		4	0.794287	1.16547		5	0.819161	0.193973
1	1.1173	0.456554		2	1.07312	0.679589		3	1.02229	0.774848		4	0.794553	1.9712		5	0.819512	0.123559
1	1.11776	0.671268		2	1.07394	0.10167		3	1.02252	0.363392		4	0.794923	0.518796		5	0.819899	0.19874
1	1.119	0.761655		2	1.07418	0.238378		3	1.02265	1.1991		4	0.795261	0.221992		5	0.820397	0.215194
1	1.11964	0.0273456		2	1.07448	0.249079		3	1.02364	0.506141		4	0.79537	0.159727		5	0.820549	0.0167262
1	1.11989	0.684878		2	1.07531	0.0291889		3	1.02386	0.229585		4	0.795665	0.173714		5	0.820792	0.462114
1	1.12067	0.269378		2	1.07552	0.572861		3	1.02413	0.704827		4	0.795866	0.231043		5	0.820897	0.225864
1	1.12136	0.16792		2	1.07554	0.0419658		3	1.02434	0.407023		4	0.795917	0.112382		5	0.821167	0.0223576
1	1.12209	1.32302		2	1.07683	0.217907		3	1.02447	0.411206		4	0.796457	0.125467		5	0.821362	0.290959
1	1.12238	0.938093		2	1.07709	0.0599479		3	1.02539	0.639161		4	0.797258	0.206861		5	0.821665	0.114127
1	1.12248	0.655264		2	1.07719	0.627495		3	1.02557	0.506141		4	0.79771	0.875174		5	0.821922	0.0756145
1	1.12273	0.119421		2	1.07727	0.0955842		3	1.02579	0.685887		4	0.797876	0.27692		5	0.822052	0.094796
1	1.1232	1.87391		2	1.07742	0.119164		3	1.02703	0.132152		4	0.797941	0.663161		5	0.822228	0.213445
1	1.12373	0.636059		2	1.07779	0.0672759		3	1.0272	0.459936		4	0.798162	0.176632		5	0.822243	0.0965256
1	1.12711	1.24656		2	1.07964	0.589236		3	1.02741	0.915946		4	0.798294	0.212903		5	0.822432	1.60284
1	1.1272	0.540495		2	1.07966	0.392636		3	1.02767	0.176958		4	0.798322	0.106422		5	0.822538	0.0887884
1	1.12732	0.333074		2	1.08075	0.0810896		3	1.02796	0.479131		4	0.799264	0.111369		5	0.822555	0.611472
1	1.12744	0.0213552		2	1.08144	0.0303412		3	1.0282	0.639161		4	0.79946	0.237047		5	0.822635	0.0336086
1	1.12782	0.428178		2	1.08165	0.438939		3	1.02845	0.112379		4	0.799485	0.0443879		5	0.822836	0.298835
1	1.12882	0.0809367		2	1.08231	0.278135		3	1.0286	0.540016		4	0.800456	0.0366273		5	0.823248	0.134316
1	1.12911	0.037351		2	1.0827	0.0108207		3	1.02877	0.578473		4	0.801245	0.497567		5	0.823407	0.191406
1	1.12978	0.223539		2	1.08293	0.0757369		3	1.0289	0.102163		4	0.801477	0.0759982		5	0.823636	0.278761
1	1.12998	0.300725		2	1.08309	0.0821134		3	1.029	1.37237		4	0.801794	0.898842		5	0.823749	0.235079
1	1.1302	0.450828		2	1.08326	0.955251		3	1.02971	0.258067		4	0.801844	0.0697089		5	0.823971	0.185445
1	1.13035	0.183122		2	1.08529	0.0889441		3	1.02995	0.0332343		4	0.802185	0.100775		5	0.824265	0.561649
1	1.13045	0.826851		2	1.09368	0.306567		3	1.03026	0.518155		4	0.802374	0.698786		5	0.824358	0.0676478
1	1.13127	0.270636		2	1.09381	0.047537		3	1.03032	1.00957		4	0.802387	0.242948		5	0.824592	0.178096
1	1.13146	1.03249		2	1.0942	0.18249		3	1.0305	0.775845		4	0.803416	0.220408		5	0.824963	0.207488
1	1.13188	0.160259		2	1.09446	0.52533		3	1.03111	0.220725		4	0.803483	0.0401		5	0.825193	1.00227
1	1.13221	1.32412		2	1.09452	0.369677		3	1.03177	0.0856599		4	0.80363	0.0610006		5	0.825208	0.0870829
1	1.13374	0.0872382		2	1.09474	0.252239		3	1.032	0.254158		4	0.803769	0.172453		5	0.825728	0.491465
1	1.13423	0.0358329		2	1.09532	0.410973		3	1.03221	0.781295		4	0.803961	0.208911		5	0.825932	0.772426
1	1.13488	0.0986573		2	1.09677	0.0469111		3	1.03254	0.0823062		4	0.804396	0.0422209		5	0.826109	0.811163
1	1.13495	0.340149		2	1.09721	0.542504		3	1.03256	0.128123		4	0.804596	0.72143		5	0.826359	0.221187
1	1.13698	1.15492		2	1.09732	0.0397418		3	1.03301	0.0185468		4	0.804844	0.0808978		5	0.826753	0.350781
1	1.13834	0.0389039		2	1.09743	0.238181		3	1.03352	0.540098		4	0.805029	0.172453		5	0.82679	0.100126
1	1.14045	0.617847		2	1.0976	0.209448		3	1.03387	0.140412		4	0.805134	0.172453		5	0.826825	0.003492
1	1.14062	0.851956		2	1.09824	0.0812202		3	1.03406	0.920998		4	0.805405	0.103425		5	0.827041	0.653594
1	1.14068	0.0120271		2	1.09828	0.199232		3	1.03416	0.642104		4	0.805952	0.160923		5	0.827087	0.351663
1	1.1408	0.396758		2	1.09839	0.105811		3	1.03439	0.840828		4	0.806102	0.577076		5	0.82729	0.101879
1	1.14093	0.517484		2	1.09904	0.125835		3	1.03454	0.117809		4	0.806277	1.46924		5	0.827531	1.28217
1	1.14399	0.368168		2	1.0992	0.573074		3	1.03597	0.742877		4	0.80816	0.483408		5	0.828106	0.700307
1	1.14429	0.657909		2	1.09931	0.447373		3	1.03684	1.01684		4	0.808516	0.245505		5	0.828174	1.14824
1	1.14439	0.564322		2	1.10006	0.194161		3	1.03702	0.387397		4	0.80918	0.323274		5	0.828737	0.700255
1	1.14443	1.1219		2	1.10021	0.200244		3	1.03714	0.726781		4	0.809596	0.0536159		5	0.828921	1.03146
1	1.14462	1.16634		2	1.10042	0.245338		3	1.03721	0.830826		4	0.809839	1.12572		5	0.828983	0.104311
1	1.14474	0.504448		2	1.10065	0.388002		3	1.03755	1.01873		4	0.810351	0.294094		5	0.829081	0.854824
1	1.14501	0.20301		2	1.10143	0.0832573		3	1.03816	1.36404		4	0.810732	0.8297		5	0.829112	0.0535242
1	1.14561	0.573451		2	1.10221	0.822553		3	1.03832	0.314269		4	0.810755	0.156806		5	0.82918	1.33829
1	1.14571	0.530941		2	1.10257	0.468809		3	1.03863	0.395949		4	0.811387	0.911658		5	0.82976	2.12675
1	1.14653	0.565248		2	1.10348	0.305893		3	1.03922	0.980599		4	0.811469	0.906991		5	0.83062	0.109612
1	1.14771	0.493842		2	1.10357	0.614654		3	1.03989	0.860381		4	0.811597	0.906991		5	0.830862	0.308446
1	1.14796	0.425516		2	1.10442	0.714824		3	1.04097	0.191225		4	0.811663	0.906991		5	0.831226	1.54315
1	1.14808	0.23532		2	1.10454	0.655516		3	1.04155	0.095903		4	0.811759	0.906991		5	0.831396	1.88934
1	1.1481	0.50655		2	1.10482	0.200244		3	1.04161	0.310519		4	0.811952	0.906991		5	0.831545	0.476928
1	1.14897	0.351309		2	1.10572	0.519015		3	1.04199	0.00680196		4	0.812498	1.06229		5	0.831833	0.676653
1	1.14932	0.357018		2	1.10817	0.139352		3	1.04217	0.209788		4	0.813089	0.379178		5	0.831879	0.404978
1	1.14938	0.766049		2	1.1083	0.0344719		3	1.04261	0.439226		4	0.813584	0.107561		5	0.832558	0.00885342
1	1.14975	0.235179		2	1.10915	0.398231		3	1.04309	0.119983		4	0.814588	1.0113		5	0.832597	1.49088
1	1.15101	0.538742		2	1.10964	0.0682888		3	1.04344	0.0231932		4	0.814712	1.00627		5	0.832627	0.00885342
1	1.15196	0.467109		2	1.11288	0.488485		3	1.04384	0.41925		4	0.814856	0.0430051		5	0.832915	0.229018
1	1.15229	0.54715		2	1.1156	0.398316		3	1.04509	0.228356		4	0.815108	0.0430051		5	0.834235	0.622078
1	1.15258	0.456934		2	1.11637	0.246356		3	1.04519	1.01938		4	0.815187	0.627895		5	0.834414	0.693605
1	1.15318	0.000624327		2	1.11777	1.24948		3	1.04526	0.874613		4	0.815777	0.00196166		5	0.834963	0.155953
1	1.1541	0.273726		2	1.12081	0.193284		3	1.04566	0.403122		4	0.81581	0.018783		5	0.835122	0.389563
1	1.1543	0.00619788		2	1.12094	0.69546		3	1.04606	0.57967		4	0.81604	0.0808309		5	0.835194	0.154074
1	1.15432	0.285883		2	1.12104	0.397053		3	1.04653	1.05163		4	0.816289	1.1203		5	0.835244	0.33944
1	1.15449	0.594779		2	1.1214	0.646116		3	1.04755	0.269597		4	0.81652	0.0250582		5	0.835453	0.0488843
1	1.15454	0.404941		2	1.12157	0.1763		3	1.04821	0.743495		4	0.816826	0.0240273		5	0.835572	0.105267
1	1.15481	0.37335		2	1.12164	0.748379		3	1.04869	0.312929		4	0.816865	0.344292		5	0.836571	0.316764
1	1.155	0.652647		2	1.12249	0.563277		3	1.04879	0.291251		4	0.817059	0.0893314		5	0.836884	0.355692
1	1.15502	0.142877		2	1.123	0.414415		3	1.04896	0.143927		4	0.817172	0.107202		5	0.836983	0.243796
1	1.15525	0.784509		2	1.12383	0.0936489		3	1.04904	0.539068		4	0.81719	0.32654		5	0.83715	1.06151
1	1.15574	0.233973		2	1.12764	0.154598		3	1.04926	0.060859		4	0.817363	0.0404307		5	0.837228	0.877747
1	1.15577	0.331234		2	1.13127	0.357458		3	1.04984	0.136292		4	0.817566	0.131801		5	0.837409	0.502888
1	1.15594	0.436356		2	1.13195	0.676886		3	1.05024	0.354923		4	0.817767	0.297129		5	0.837792	0.964664
1	1.15718	1.03465		2	1.13418	0.0713493		3	1.05089	0.326528		4	0.8179	0.101696		5	0.8379	0.36204
1	1.15857	0.20159		2	1.13543	0.212852		3	1.05125	0.0535701		4	0.818154	0.172369		5	0.838159	0.536675
1	1.15897	0.0134268		2	1.1362	0.222496		3	1.05329	0.328878		4	0.81826	0.261858		5	0.838286	0.179787
1	1.15936	0.345376		2	1.13631	1.01872		3	1.05409	0.0207593		4	0.818412	0.190086		5	0.838755	0.316935
1	1.15961	0.82007		2	1.13637	1.66455		3	1.05578	0.125505		4	0.818736	0.053421		5	0.83889	0.0902625
1	1.15981	0.556314		2	1.13649	1.10381		3	1.05604	0.0544343		4	0.818905	0.702696		5	0.838985	0.276766
1	1.16222	0.0847314		2	1.1368	0.35875		3	1.05608	0.61041		4	0.819313	0.552647		5	0.839149	0.426148
1	1.16245	0.0199649		2	1.13682	0.450014		3	1.057	0.307055		4	0.819396	0.273694		5	0.839289	0.480577
1	1.16384	0.396288		2	1.13693	0.0981322		3	1.05707	0.382869		4	0.820141	0.378475		5	0.840882	0.00125183
1	1.16433	1.23486		2	1.13725	0.0382641		3	1.0575	0.0265542		4	0.820193	0.623664		5	0.841405	1.09148
1	1.16447	0.819635		2	1.13785	0.306498		3	1.05812	0.328372		4	0.820514	0.283972		5	0.841559	1.0694
1	1.16678	0.424476		2	1.13819	0.0490863		3	1.05977	0.184981		4	0.820634	0.193052		5	0.841669	0.393628
1	1.16733	0.254319		2	1.13831	0.0127703		3	1.0611	0.372598		4	0.821095	0.375475		5	0.842012	0.0423186
1	1.1676	0.954479		2	1.13854	0.178466		3	1.06114	0.92545		4	0.821127	0.118216		5	0.842167	1.35523
1	1.16784	1.04181		2	1.13864	0.915985		3	1.0613	1.38815		4	0.821341	0.606886		5	0.842625	0.170506
1	1.16805	1.76343		2	1.13885	0.309091		3	1.06164	0.222372		4	0.821775	0.0012341		5	0.842689	0.0440861
1	1.17076	0.329457		2	1.13898	0.25715		3	1.06175	0.13922		4	0.822232	0.107484		5	0.842794	0.356803
1	1.17599	0.778221		2	1.13901	0.181317		3	1.06183	0.112132		4	0.822271	0.0403362		5	0.843015	0.301006
1	1.17679	0.0987754		2	1.13907	0.235857		3	1.06194	0.0946955		4	0.822291	0.0534812		5	0.843224	0.231535
1	1.17705	0.0987754		2	1.13969	0.769147		3	1.06225	1.89435		4	0.822503	0.417063		5	0.84339	1.14568
1	1.17731	0.0987754		2	1.1402	0.105541		3	1.06258	0.55104		4	0.822871	0.356615		5	0.844059	0.181211
1	1.17735	1.0958		2	1.14171	0.270085		3	1.06429	0.322329		4	0.824894	0.259063		5	0.844278	0.328477
1	1.17736	0.0987754		2	1.14374	0.999225		3	1.06547	0.237618		4	0.825462	0.303669		5	0.844949	0.389137
1	1.17768	0.0546151		2	1.14436	0.295995		3	1.06567	0.141439		4	0.825521	0.224852		5	0.845286	0.176693
1	1.17775	0.0866949		2	1.14474	0.295997		3	1.0678	0.438589		4	0.828547	0.314101		5	0.845486	0.316432
1	1.17835	0.106374		2	1.1453	0.899694		3	1.0681	0.0948886		4	0.82864	0.09058		5	0.845581	0.954228
1	1.17861	0.260761		2	1.14535	1.12119		3	1.06838	0.186224		4	0.830193	0.175452		5	0.845704	0.207904
1	1.17898	0.191531		2	1.14537	0.158385		3	1.06851	0.318553		4	0.830685	1.1701		5	0.8462	0.461126
1	1.17939	0.856417		2	1.14567	0.919632		3	1.0691	0.172259		4	0.830813	0.115165		5	0.846282	1.04363
1	1.17944	0.829521		2	1.14606	0.115688		3	1.06943	0.50551		4	0.832943	0.0447442		5	0.846343	0.460155
1	1.17996	0.176367		2	1.14623	0.275874		3	1.06971	0.820372		4	0.833229	0.139069		5	0.846526	0.299698
1	1.18003	0.800161		2	1.14634	0.0254151		3	1.07118	0.474581		4	0.833532	0.334245		5	0.846641	0.75599
1	1.18029	0.4834		2	1.1466	0.466243		3	1.07212	0.835178		4	0.833823	0.0322167		5	0.846913	0.494067
1	1.18035	0.925601		2	1.14682	0.30178		3	1.07232	0.144564		4	0.834133	0.0370404		5	0.847002	1.34885
1	1.18194	0.194141		2	1.14701	0.541607		3	1.07461	0.790196		4	0.83419	0.681235		5	0.847214	0.466049
1	1.1821	1.30018		2	1.14737	0.368904		3	1.07558	0.38001		4	0.834415	0.00384389		5	0.847266	0.494067
1	1.18237	0.573451		2	1.14809	0.488557		3	1.0761	1.2341		4	0.834495	0.479417		5	0.847325	0.418297
1	1.18257	0.879595		2	1.1483	0.756548		3	1.07653	0.07622		4	0.835345	0.2241		5	0.847543	0.326841
1	1.18262	0.562162		2	1.14834	0.533192		3	1.07668	0.133979		4	0.835971	0.143744		5	0.847763	0.490416
1	1.18285	0.798879		2	1.14841	1.06387		3	1.07731	0.491039		4	0.837879	0.809532		5	0.847934	0.668196
1	1.18304	1.27491		2	1.14883	1.08477		3	1.07739	1.32126		4	0.838092	0.388747		5	0.848148	0.433546
1	1.18338	0.714929		2	1.1489	0.539592		3	1.07791	0.557678		4	0.838956	0.375151		5	0.848266	0.196302
1	1.18414	0.932059		2	1.14924	0.691789		3	1.07797	0.477515		4	0.839011	0.117601		5	0.848433	0.486665
1	1.18425	0.606778		2	1.1503	0.36635		3	1.0783	0.573345		4	0.839032	0.343508		5	0.848453	0.0676295
1	1.18473	0.2942		2	1.15056	0.0460467		3	1.0792	0.489074		4	0.839268	0.064291		5	0.848477	0.255203
1	1.18483	1.20515		2	1.15099	0.0728162		3	1.07928	0.469184		4	0.839543	0.037715		5	0.848766	0.433546
1	1.18494	0.644326		2	1.15125	0.557233		3	1.07974	0.310933		4	0.839578	0.0875599		5	0.849266	0.25795
1	1.18559	0.798879		2	1.15295	0.534987		3	1.08003	0.649825		4	0.840466	0.426015		5	0.849299	0.538136
1	1.18661	0.957099		2	1.15301	0.656113		3	1.08026	0.0629444		4	0.840717	0.505461		5	0.850078	0.882977
1	1.1875	1.21828		2	1.15304	0.72072		3	1.08071	0.103588		4	0.841306	1.08665		5	0.850195	0.395443
1	1.18849	0.23584		2	1.15324	0.42638		3	1.08254	0.0772637		4	0.841536	0.735387		5	0.851111	0.466696
1	1.18937	0.496961		2	1.15375	0.320114		3	1.08281	0.266779		4	0.842735	0.148787		5	0.851135	0.538136
1	1.18942	0.09791		2	1.15483	0.388831		3	1.08318	0.0664969		4	0.842906	0.407594		5	0.851546	0.538136
1	1.18962	0.212232		2	1.15517	0.0764549		3	1.08515	0.599771		4	0.84356	0.233908		5	0.851564	0.900708
1	1.18992	1.05223		2	1.15594	0.0808525		3	1.08544	0.752042		4	0.843713	0.162984		5	0.851786	0.0911137
1	1.18999	0.0446146		2	1.15675	0.113257		3	1.08577	0.00699702		4	0.844708	0.333581		5	0.852924	0.233182
1	1.19016	0.09791		2	1.15772	0.543544		3	1.08772	0.437277		4	0.847871	0.312179		5	0.853326	0.303657
1	1.1907	0.171901		2	1.15847	0.136573		3	1.08794	0.489469		4	0.84809	0.061647		5	0.853411	0.0735328
1	1.19112	1.82653		2	1.16001	0.00598022		3	1.0882	0.14026		4	0.850385	0.277751		5	0.853523	1.23553
1	1.19165	0.09791		2	1.16298	0.0826912		3	1.08837	0.828818		4	0.851262	0.880962		5	0.853646	0.76664
1	1.19248	0.220732		2	1.16379	0.053506		3	1.08898	0.0339111		4	0.851474	0.180068		5	0.85378	0.1091
1	1.19308	0.00272158		2	1.16476	0.0957268		3	1.08929	1.5717		4	0.851731	0.418764		5	0.855077	1.14568
1	1.19342	0.169043		2	1.16522	0.518393		3	1.08958	1.24879		4	0.854376	0.122126		5	0.855186	0.0347147
1	1.19367	0.246268		2	1.16599	0.091682		3	1.08973	0.335095		4	0.854769	0.776374		5	0.85529	0.203122
1	1.19405	0.220732		2	1.16622	0.127721		3	1.08986	0.39373		4	0.855577	0.0142424		5	0.855354	0.848186
1	1.19524	1.17527		2	1.16625	1.0791		3	1.09031	1.96143		4	0.855958	0.888192		5	0.855455	0.646981
1	1.19535	0.0893255		2	1.16679	1.13907		3	1.09098	2.03269		4	0.858098	0.699282		5	0.855558	0.819119
1	1.19554	0.0307146		2	1.16684	0.133447		3	1.09147	0.29422		4	0.858191	0.387847		5	0.855775	0.094556
1	1.19629	0.0122611		2	1.16727	0.491559		3	1.09155	0.521425		4	0.858298	0.355801		5	0.856576	0.705331
1	1.19648	0.231635		2	1.16746	0.0880597		3	1.0923	0.145204		4	0.858477	0.726068		5	0.857053	1.45767
1	1.1967	0.468259		2	1.16755	0.629481		3	1.09321	0.341718		4	0.858655	0.21473		5	0.857372	0.0848268
1	1.19694	0.509248		2	1.1677	0.305867		3	1.09339	0.719915		4	0.858734	0.117975		5	0.857398	0.705009
1	1.19698	0.61887		2	1.1679	0.771694		3	1.09359	0.294479		4	0.858764	0.293602		5	0.857425	0.0492122
1	1.20029	1.57963		2	1.16815	0.518456		3	1.09514	0.196717		4	0.858831	0.0501266		5	0.857521	0.586477
1	1.20105	0.300558		2	1.16847	0.0724252		3	1.09522	3.71828		4	0.858912	0.0018502		5	0.857919	1.26365
1	1.20139	0.389821		2	1.1688	0.280652		3	1.0958	0.41243		4	0.859073	0.00941822		5	0.858925	0.0497168
1	1.20237	0.363839		2	1.1694	0.563598		3	1.09645	0.687439		4	0.859201	0.417955		5	0.859427	0.228699
1	1.2025	0.442715		2	1.16965	0.612742		3	1.09694	0.221786		4	0.85928	0.360246		5	0.859709	0.0472021
1	1.20292	0.369995		2	1.16988	1.29745		3	1.09714	0.428423		4	0.85971	0.182079		5	0.85978	0.0447777
1	1.20303	0.0210606		2	1.1701	0.190611		3	1.09719	1.02729		4	0.859922	0.450076		5	0.860219	0.185054
1	1.20342	0.101719		2	1.17039	1.48679		3	1.09779	0.923163		4	0.860431	1.26648		5	0.860572	0.319585
1	1.20363	0.175844		2	1.17126	0.00813798		3	1.09802	0.231964		4	0.861265	2.0674		5	0.860702	0.168271
1	1.20455	0.238748		2	1.17248	0.949197		3	1.09889	0.35552		4	0.864099	0.339324		5	0.860836	0.185054
1	1.20497	1.58864		2	1.17383	0.951402		3	1.09988	0.311964		4	0.865789	0.686773		5	0.861377	0.196418
1	1.2056	0.0331103		2	1.17679	0.391067		3	1.10012	0.56277		4	0.866029	0.0121704		5	0.861429	0.196418
1	1.20618	0.358246		2	1.17706	0.109139		3	1.10038	0.0747577		4	0.866091	0.217091		5	0.862094	0.314102
1	1.20663	0.24532		2	1.17715	0.0950134		3	1.1005	0.279208		4	0.866396	2.267		5	0.862292	1.10641
1	1.20664	0.479004		2	1.17719	0.0234996		3	1.10073	0.0917238		4	0.86805	0.134544		5	0.862543	0.138875
1	1.20883	0.2927		2	1.17722	0.193311		3	1.10286	0.0874973		4	0.868244	0.134544		5	0.863361	0.756591
1	1.20894	0.418695		2	1.17748	0.0914065		3	1.10377	1.15768		4	0.868299	0.781156		5	0.86351	0.503025
1	1.20966	0.0333039		2	1.17757	0.304099		3	1.10472	0.310616		4	0.870511	0.00196937		5	0.863683	0.250378
1	1.21063	0.206551		2	1.17902	0.0695806		3	1.10552	0.309139		4	0.870608	0.290452		5	0.86387	0.627315
1	1.21128	0.648383		2	1.17933	0.258368		3	1.10556	0.170334		4	0.870696	0.289428		5	0.865477	0.584728
1	1.21225	0.000995409		2	1.1799	0.0078008		3	1.10594	0.0868413		4	0.870922	0.234823		5	0.865725	0.00119673
1	1.2136	0.0215931		2	1.18004	0.256957		3	1.10601	0.309176		4	0.871466	0.523501		5	0.865945	0.37191
1	1.21422	0.607461		2	1.18006	0.0162405		3	1.10635	0.0674974		4	0.871868	0.0153153		5	0.868094	0.86098
1	1.21442	0.172573		2	1.18009	0.00410612		3	1.10643	0.194835		4	0.872036	0.175592		5	0.868227	0.0557488
1	1.21584	0.065853		2	1.1803	0.255722		3	1.10664	0.398435		4	0.872914	0.158279		5	0.868358	0.216358
1	1.21592	0.22676		2	1.18064	0.283781		3	1.10685	0.12757		4	0.87305	0.607537		5	0.868512	0.198726
1	1.21679	0.0544951		2	1.18076	0.0339155		3	1.10833	0.303326		4	0.873302	0.215604		5	0.869183	0.234945
1	1.21682	0.122328		2	1.18077	0.27357		3	1.10847	0.342901		4	0.873322	0.272615		5	0.869343	0.586307
[truncated: 51,341 more rows]

## Sheet: Figure 2G
Raw data for Figure 2G
Tray	Tube	Line	Tissue	As75
2140	19	Kr-0	Leaves	12.9231
2140	91	Kr-0	Leaves	11.9085
2140	73	Kr-0	Leaves	14.3294
2140	1	Kr-0	Leaves	19.6269
2140	37	Kr-0	Leaves	10.7659
2140	55	Kr-0	Leaves	12.4514
2140	46	Kr-0	Leaves	13.2593
2140	10	Kr-0	Leaves	19.6747
2140	82	Kr-0	Leaves	9.6471
2140	28	Kr-0	Leaves	11.7052
2140	64	Kr-0	Leaves	16.2299
2140	100	Kr-0	Leaves	10.3781
2140	20	Col-0	Leaves	1.67101
2140	2	Col-0	Leaves	1.79296
2140	56	Col-0	Leaves	1.87309
2140	38	Col-0	Leaves	2.21915
2140	92	Col-0	Leaves	2.15195
2140	74	Col-0	Leaves	2.17268
2140	11	Col-0	Leaves	2.11093
2140	29	Col-0	Leaves	2.36223
2140	83	Col-0	Leaves	2.46884
2140	47	Col-0	Leaves	1.96301
2140	101	Col-0	Leaves	3.36401
2140	65	Col-0	Leaves	1.72562
2140	57	hac1-2	Leaves	14.9634
2140	39	hac1-2	Leaves	14.7356
2140	93	hac1-2	Leaves	14.4438
2140	3	hac1-2	Leaves	11.0453
2140	75	hac1-2	Leaves	17.0309
2140	21	hac1-2	Leaves	7.56682
2140	84	hac1-2	Leaves	14.5303
2140	102	hac1-2	Leaves	10.3999
2140	12	hac1-2	Leaves	9.14287
2140	30	hac1-2	Leaves	8.64822
2140	66	hac1-2	Leaves	14.068
2140	48	hac1-2	Leaves	16.1435
2140	22	hac1-1	Leaves	8.32069
2140	58	hac1-1	Leaves	18.3657
2140	4	hac1-1	Leaves	11.8591
2140	76	hac1-1	Leaves	16.0387
2140	40	hac1-1	Leaves	16.5052
2140	94	hac1-1	Leaves	16.3828
2140	85	hac1-1	Leaves	11.2037
2140	49	hac1-1	Leaves	14.3699
2140	31	hac1-1	Leaves	11.8797
2140	103	hac1-1	Leaves	12.7226
2140	67	hac1-1	Leaves	12.1391
2140	13	hac1-1	Leaves	10.7346
2140	59	Kr-0 x hac1-1 F1	Leaves	15.5791
2140	23	Kr-0 x hac1-1 F1	Leaves	19.5488
2140	77	Kr-0 x hac1-1 F1	Leaves	20.3783
2140	95	Kr-0 x hac1-1 F1	Leaves	17.8175
2140	5	Kr-0 x hac1-1 F1	Leaves	17.0179
2140	41	Kr-0 x hac1-1 F1	Leaves	19.8431
2140	50	Kr-0 x hac1-1 F1	Leaves	14.3876
2140	68	Kr-0 x hac1-1 F1	Leaves	9.12286
2140	32	Kr-0 x hac1-1 F1	Leaves	10.9706
2140	104	Kr-0 x hac1-1 F1	Leaves	14.7902
2140	14	Kr-0 x hac1-1 F1	Leaves	10.4972
2140	86	Kr-0 x hac1-1 F1	Leaves	16.2893
2140	42	Kr-0 x hac1-2 F1	Leaves	13.6792
2140	96	Kr-0 x hac1-2 F1	Leaves	14.0975
2140	78	Kr-0 x hac1-2 F1	Leaves	14.1801
2140	60	Kr-0 x hac1-2 F1	Leaves	13.693
2140	24	Kr-0 x hac1-2 F1	Leaves	14.1007
2140	6	Kr-0 x hac1-2 F1	Leaves	17.5026
2140	33	Kr-0 x hac1-2 F1	Leaves	12.1694
2140	105	Kr-0 x hac1-2 F1	Leaves	18.421
2140	15	Kr-0 x hac1-2 F1	Leaves	13.3628
2140	87	Kr-0 x hac1-2 F1	Leaves	19.1618
2140	69	Kr-0 x hac1-2 F1	Leaves	17.0701
2140	51	Kr-0 x hac1-2 F1	Leaves	11.1048

## Sheet: Figure 2H
Raw data for Figure 2H
Tray	Tube	Line	Tissue	As75
2142	37	Kr-0	Leaves	7.62681
2142	55	Kr-0	Leaves	6.75068
2142	73	Kr-0	Leaves	5.71487
2142	19	Kr-0	Leaves	5.80865
2142	91	Kr-0	Leaves	5.96962
2142	1	Kr-0	Leaves	7.6616
2142	28	Kr-0	Leaves	5.81836
2142	10	Kr-0	Leaves	5.56787
2142	82	Kr-0	Leaves	7.59374
2142	64	Kr-0	Leaves	8.58756
2142	46	Kr-0	Leaves	7.16739
2142	100	Kr-0	Leaves	7.31853
2142	20	Col-0	Leaves	0.829072
2142	92	Col-0	Leaves	1.05343
2142	2	Col-0	Leaves	0.946387
2142	56	Col-0	Leaves	0.666459
2142	74	Col-0	Leaves	0.82663
2142	38	Col-0	Leaves	1.0128
2142	11	Col-0	Leaves	0.801676
2142	101	Col-0	Leaves	1.76357
2142	29	Col-0	Leaves	2.49377
2142	83	Col-0	Leaves	1.78957
2142	47	Col-0	Leaves	0.623601
2142	65	Col-0	Leaves	1.90212
2142	5	Kr-0 / HAC1-C1	Leaves	1.69412
2142	6	Kr-0 / HAC1-C2	Leaves	1.56052
2142	7	Kr-0 / HAC1-C3	Leaves	1.81299
2142	14	Kr-0 / HAC1-C4	Leaves	0.86355
2142	15	Kr-0 / HAC1-C5	Leaves	0.977137
2142	23	Kr-0 / HAC1-C1	Leaves	0.851273
2142	24	Kr-0 / HAC1-C2	Leaves	0.872
2142	25	Kr-0 / HAC1-C3	Leaves	1.86336
2142	32	Kr-0 / HAC1-C4	Leaves	1.89351
2142	33	Kr-0 / HAC1-C5	Leaves	1.07372
2142	41	Kr-0 / HAC1-C1	Leaves	0.911489
2142	42	Kr-0 / HAC1-C2	Leaves	1.33227
2142	43	Kr-0 / HAC1-C3	Leaves	2.7412
2142	50	Kr-0 / HAC1-C4	Leaves	2.08027
2142	51	Kr-0 / HAC1-C5	Leaves	1.8874
2142	60	Kr-0 / HAC1-C1	Leaves	2.52927
2142	61	Kr-0 / HAC1-C2	Leaves	1.7574
2142	68	Kr-0 / HAC1-C3	Leaves	1.71733
2142	69	Kr-0 / HAC1-C4	Leaves	2.12021
2142	70	Kr-0 / HAC1-C5	Leaves	2.32786
