# Supplementary material for: Genome-wide Association Mapping Identifies a New Arsenate Reductase Enzyme Critical for Limiting Arsenic Accumulation in Plants
Source: PLoS Biol. 2014 Dec 2;12(12):e1002009. doi: 10.1371/journal.pbio.1002009 (PMC4251824; doi:10.1371/journal.pbio.1002009)
Supplement: Data S4 — Raw data used to prepare Figure 4 . (XLSX) [file pbio.1002009.s014.xlsx]

## Sheet: Figure 4A
Raw data for Figure 4A
Strain	As (V) concentration
	0	0.25	0.5	1	2
WT-Vector	1.412	1.182	0.912	0.437	0.196
	1.473	1.175	0.883	0.462	0.187
	1.427	1.169	0.875	0.451	0.175
WT-HAC1	1.415	1.321	1.256	1.013	0.625
	1.408	1.303	1.268	1.014	0.633
	1.443	1.298	1.299	1.112	0.61
arsC-Vector	1.405	0.872	0.452	0.035	0.011
	1.458	0.893	0.443	0.026	0.012
	1.411	0.86	0.475	0.043	0.01
arsC-HAC1	1.4	1.307	1.203	0.996	0.503
	1.502	1.288	1.205	1.023	0.513
	1.463	1.332	1.211	1.002	0.516

## Sheet: Figure 4B
E. coli WC3110 transformed with empty vector or HAC1
10 µM As(V), treatment for 72 h, As speciation analysis by ICP-MS
	As(III) production in the medium (mM)
Replicate	EV	HAC1
Rep 1	0	1.03373
Rep 2	0	0.969867
Rep 3	0	0.9924
Mean	0	0.998667
SE	0	0.0187011

## Sheet: Figure 4C
Raw data for Figure 4C
Time (Seconds)	Absorption at 340 nm
	hac1)	hac1	hac1	EM	EM	EM
0	1.235	1.213	1.217	1.208	1.221	1.234
10	1.202	1.18	1.185	1.208	1.223	1.234
20	1.173	1.151	1.16	1.206	1.22	1.234
30	1.145	1.119	1.129	1.203	1.219	1.235
40	1.116	1.09	1.1	1.204	1.218	1.234
50	1.082	1.062	1.068	1.202	1.219	1.233
60	1.05	1.031	1.039	1.201	1.218	1.234
70	1.022	1.01	1.01	1.203	1.219	1.233
80	1	0.972	0.98	1.2	1.216	1.232
90	0.967	0.941	0.951	1.203	1.217	1.231
100	0.935	0.914	0.918	1.204	1.218	1.232
110	0.904	0.887	0.889	1.203	1.218	1.231
120	0.873	0.851	0.875	1.204	1.216	1.23
130	0.846	0.827	0.826	1.202	1.217	1.232
140	0.815	0.793	0.798	1.202	1.215	1.23
150	0.786	0.76	0.769	1.201	1.216	1.229
160	0.752	0.733	0.741	1.202	1.216	1.228
170	0.72	0.708	0.705	1.201	1.215	1.229
180	0.691	0.68	0.671	1.2	1.213	1.228
190	0.664	0.641	0.643	1.199	1.214	1.227
200	0.637	0.61	0.616	1.201	1.215	1.226
210	0.602	0.589	0.582	1.2	1.216	1.225
220	0.572	0.556	0.553	1.198	1.214	1.226
230	0.543	0.529	0.526	1.197	1.213	1.227
240	0.518	0.496	0.495	1.196	1.213	1.226
250	0.48	0.467	0.467	1.196	1.212	1.225
260	0.451	0.438	0.438	1.195	1.213	1.223
270	0.391	0.401	0.409	1.196	1.214	1.224
280	0.362	0.376	0.378	1.195	1.213	1.223
290	0.329	0.348	0.347	1.194	1.212	1.224
300	0.298	0.312	0.318	1.195	1.211	1.222
