# Supplementary material for: Genome-wide Association Mapping Identifies a New Arsenate Reductase Enzyme Critical for Limiting Arsenic Accumulation in Plants
Source: PLOS journal article supplement (doi:10.1371/journal.pbio.1002009), 2014-12-02
Supplement: S3 (10.1371/journal.pbio.1002009.s003) [file journal.pbio.1002009.s003]

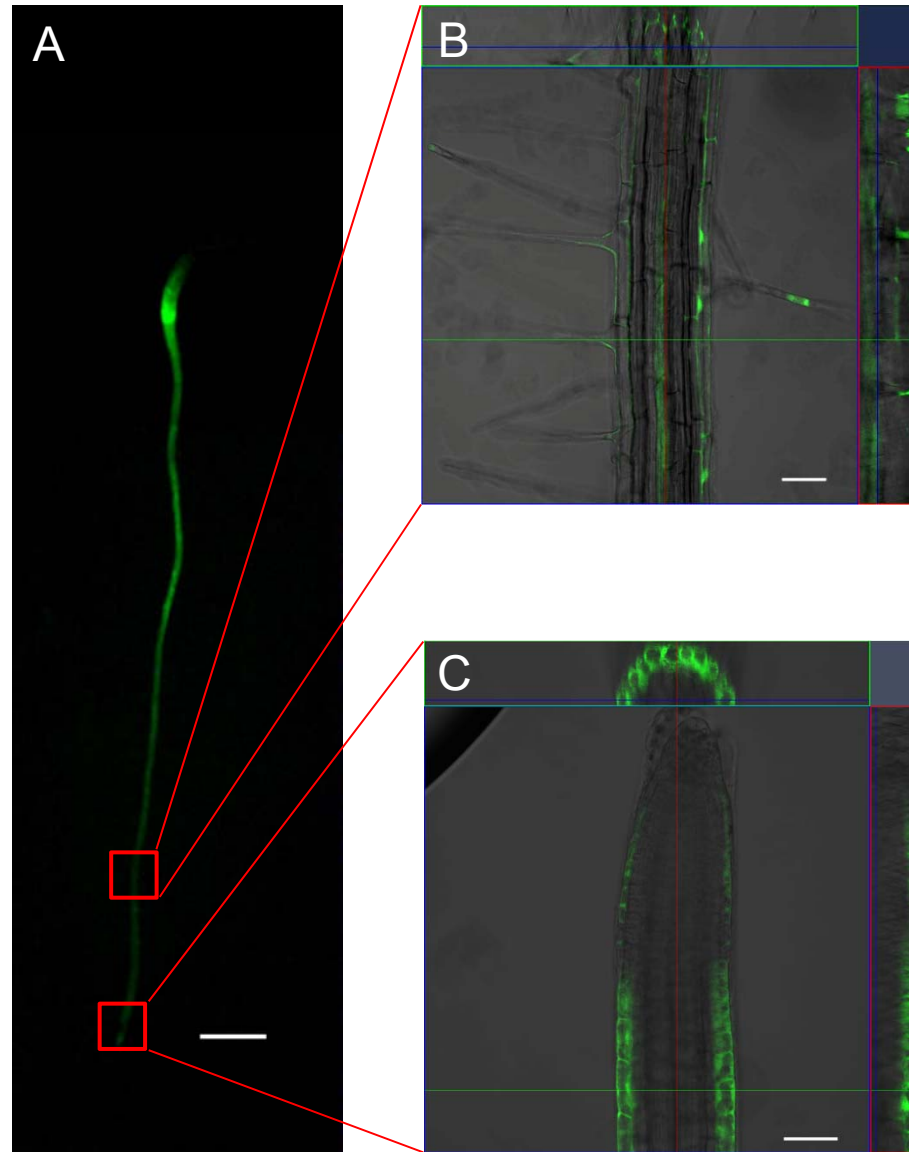

**Figure S3. Fluorescence images of *HAC1* promoter driven *HAC1*-GFP fusion protein.** (A) Fluorescence image of whole transgenic seedling obtained with a stereo fluorescence microscope. (B-C) Fluorescence images of the root hair region (B) and root tip region (C) obtained with a confocal microscope. The upper panels in (B-C) show optical section at the position indicated with a green horizontal line, and the right panels in (B-C) show optical sections at the position indicated with a red vertical line. Blue lines in top and right panels represent the z-axis. Scale bar = 1 mm in (A) and 50  $\mu$ m in (B and C).
