# Supplementary material for: Genome-wide Association Mapping Identifies a New Arsenate Reductase Enzyme Critical for Limiting Arsenic Accumulation in Plants
Source: PLOS journal article supplement (doi:10.1371/journal.pbio.1002009), 2014-12-02
Supplement: S4 (10.1371/journal.pbio.1002009.s004) [file journal.pbio.1002009.s004]

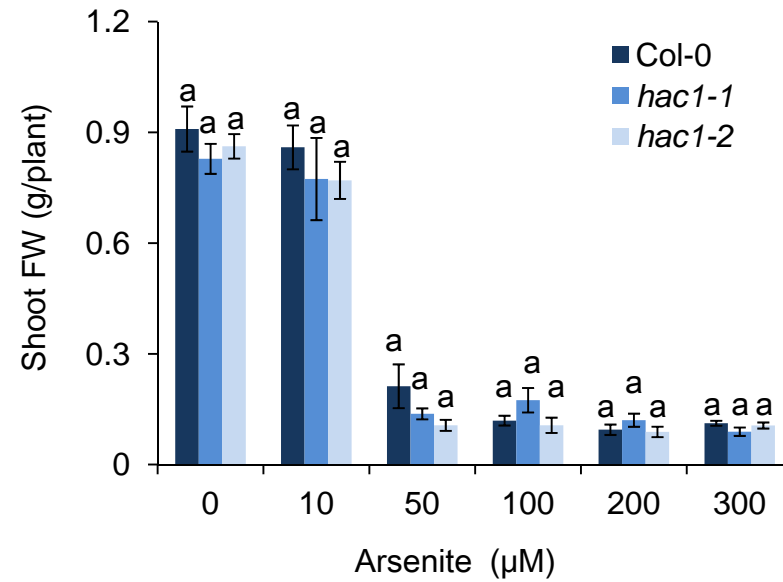

**Figure S4. *HAC1* plays no role in arsenite resistance.** Both Col-0 wild-type and the two *hac1* null alleles show no difference in shoot fresh weight (FW) after growth for 7 days in hydroponic Hoagland's solution containing various concentrations of arsenite. No significant differences between genotypes were observed using a one way ANOVA followed by least significant difference (LSD) test at the probability of  $p < 0.05$ . Data represent means  $\pm$  S.E. ( $n = 6$ ). Raw data available in Data S12.
